# Supplementary material for: Investigating the cardioprotective effects of Fuzheng Yangxin recipe based on network pharmacology and experimental evaluation
Source: Front Pharmacol. 2022 Sep 26;13:1004929. doi: 10.3389/fphar.2022.1004929 (PMC9549113; doi:10.3389/fphar.2022.1004929)
Supplement: Supplementary file 1 [file Table2.XLSX]

## Sheet: Sheet1
Drug	PubChem CID	Name	Gene
Panax notoginseng (Burkill) F. H. Chen	15560276	alpha-Gurjunene	PPARA
Panax notoginseng (Burkill) F. H. Chen	15560276	alpha-Gurjunene	CNR2
Panax notoginseng (Burkill) F. H. Chen	15560276	alpha-Gurjunene	NR1I3
Panax notoginseng (Burkill) F. H. Chen	15560276	alpha-Gurjunene	FAAH
Panax notoginseng (Burkill) F. H. Chen	15560276	alpha-Gurjunene	TRPV1
Panax notoginseng (Burkill) F. H. Chen	6432312	gamma-Elemene	PPARA
Panax notoginseng (Burkill) F. H. Chen	6432312	gamma-Elemene	CNR2
Panax notoginseng (Burkill) F. H. Chen	6432312	gamma-Elemene	NR1H3
Panax notoginseng (Burkill) F. H. Chen	6432312	gamma-Elemene	CXCR3
Panax notoginseng (Burkill) F. H. Chen	5280343	Quercetin	NOX4
Panax notoginseng (Burkill) F. H. Chen	5280343	Quercetin	AVPR2
Panax notoginseng (Burkill) F. H. Chen	5280343	Quercetin	AKR1B1
Panax notoginseng (Burkill) F. H. Chen	5280343	Quercetin	XDH
Panax notoginseng (Burkill) F. H. Chen	5280343	Quercetin	MAOA
Panax notoginseng (Burkill) F. H. Chen	5280343	Quercetin	IGF1R
Panax notoginseng (Burkill) F. H. Chen	5280343	Quercetin	FLT3
Panax notoginseng (Burkill) F. H. Chen	5280343	Quercetin	CYP19A1
Panax notoginseng (Burkill) F. H. Chen	5280343	Quercetin	EGFR
Panax notoginseng (Burkill) F. H. Chen	5280343	Quercetin	F2
Panax notoginseng (Burkill) F. H. Chen	5280343	Quercetin	CA2
Panax notoginseng (Burkill) F. H. Chen	5280343	Quercetin	PIM1
Panax notoginseng (Burkill) F. H. Chen	5280343	Quercetin	ALOX5
Panax notoginseng (Burkill) F. H. Chen	5280343	Quercetin	AURKB
Panax notoginseng (Burkill) F. H. Chen	5280343	Quercetin	DRD4
Panax notoginseng (Burkill) F. H. Chen	5280343	Quercetin	ADORA1
Panax notoginseng (Burkill) F. H. Chen	5280343	Quercetin	CA7
Panax notoginseng (Burkill) F. H. Chen	5280343	Quercetin	GLO1
Panax notoginseng (Burkill) F. H. Chen	5280343	Quercetin	MPO
Panax notoginseng (Burkill) F. H. Chen	5280343	Quercetin	PIK3R1
Panax notoginseng (Burkill) F. H. Chen	5280343	Quercetin	ADORA2A
Panax notoginseng (Burkill) F. H. Chen	5280343	Quercetin	DAPK1
Panax notoginseng (Burkill) F. H. Chen	5280343	Quercetin	PYGL
Panax notoginseng (Burkill) F. H. Chen	5280343	Quercetin	CA1
Panax notoginseng (Burkill) F. H. Chen	5280343	Quercetin	GSK3B
Panax notoginseng (Burkill) F. H. Chen	5280343	Quercetin	SRC
Panax notoginseng (Burkill) F. H. Chen	5280343	Quercetin	PTK2
Panax notoginseng (Burkill) F. H. Chen	5280343	Quercetin	HSD17B2
Panax notoginseng (Burkill) F. H. Chen	5280343	Quercetin	KDR
Panax notoginseng (Burkill) F. H. Chen	5280343	Quercetin	MMP13
Panax notoginseng (Burkill) F. H. Chen	5280343	Quercetin	MMP3
Panax notoginseng (Burkill) F. H. Chen	5280343	Quercetin	CA3
Panax notoginseng (Burkill) F. H. Chen	5280343	Quercetin	ALOX15
Panax notoginseng (Burkill) F. H. Chen	5280343	Quercetin	ABCC1
Panax notoginseng (Burkill) F. H. Chen	5280343	Quercetin	PLK1
Panax notoginseng (Burkill) F. H. Chen	5280343	Quercetin	CA6
Panax notoginseng (Burkill) F. H. Chen	5280343	Quercetin	CDK1
Panax notoginseng (Burkill) F. H. Chen	5280343	Quercetin	MMP9
Panax notoginseng (Burkill) F. H. Chen	5280343	Quercetin	CA12
Panax notoginseng (Burkill) F. H. Chen	5280343	Quercetin	MMP2
Panax notoginseng (Burkill) F. H. Chen	5280343	Quercetin	PKN1
Panax notoginseng (Burkill) F. H. Chen	5280343	Quercetin	CA14
Panax notoginseng (Burkill) F. H. Chen	5280343	Quercetin	CA9
Panax notoginseng (Burkill) F. H. Chen	5280343	Quercetin	CSNK2A1
Panax notoginseng (Burkill) F. H. Chen	5280343	Quercetin	ALOX12
Panax notoginseng (Burkill) F. H. Chen	5280343	Quercetin	MET
Panax notoginseng (Burkill) F. H. Chen	5280343	Quercetin	CA4
Panax notoginseng (Burkill) F. H. Chen	5280343	Quercetin	NEK2
Panax notoginseng (Burkill) F. H. Chen	5280343	Quercetin	CXCR1
Panax notoginseng (Burkill) F. H. Chen	5280343	Quercetin	CAMK2B
Panax notoginseng (Burkill) F. H. Chen	5280343	Quercetin	ALK
Panax notoginseng (Burkill) F. H. Chen	5280343	Quercetin	AKT1
Panax notoginseng (Burkill) F. H. Chen	5280343	Quercetin	ABCB1
Panax notoginseng (Burkill) F. H. Chen	5280343	Quercetin	NEK6
Panax notoginseng (Burkill) F. H. Chen	5280343	Quercetin	PLA2G1B
Panax notoginseng (Burkill) F. H. Chen	5280343	Quercetin	CA5A
Panax notoginseng (Burkill) F. H. Chen	5280343	Quercetin	BACE1
Panax notoginseng (Burkill) F. H. Chen	5280343	Quercetin	CYP1B1
Panax notoginseng (Burkill) F. H. Chen	5280343	Quercetin	AXL
Panax notoginseng (Burkill) F. H. Chen	5280343	Quercetin	ABCG2
Panax notoginseng (Burkill) F. H. Chen	5280343	Quercetin	NUAK1
Panax notoginseng (Burkill) F. H. Chen	5280343	Quercetin	AKR1C2
Panax notoginseng (Burkill) F. H. Chen	5280343	Quercetin	AKR1C1
Panax notoginseng (Burkill) F. H. Chen	5280343	Quercetin	AKR1C3
Panax notoginseng (Burkill) F. H. Chen	5280343	Quercetin	AKR1C4
Panax notoginseng (Burkill) F. H. Chen	5280343	Quercetin	CA13
Panax notoginseng (Burkill) F. H. Chen	5280343	Quercetin	AKR1A1
Panax notoginseng (Burkill) F. H. Chen	5280343	Quercetin	GPR35
Panax notoginseng (Burkill) F. H. Chen	5280343	Quercetin	MAPT
Panax notoginseng (Burkill) F. H. Chen	5280343	Quercetin	KDM4E
Panax notoginseng (Burkill) F. H. Chen	5280343	Quercetin	TOP2A
Panax notoginseng (Burkill) F. H. Chen	5280343	Quercetin	INSR
Panax notoginseng (Burkill) F. H. Chen	5280343	Quercetin	ACHE
Panax notoginseng (Burkill) F. H. Chen	5280343	Quercetin	MYLK
Panax notoginseng (Burkill) F. H. Chen	5280343	Quercetin	SYK
Panax notoginseng (Burkill) F. H. Chen	5280343	Quercetin	PIK3CG
Panax notoginseng (Burkill) F. H. Chen	5280343	Quercetin	APEX1
Panax notoginseng (Burkill) F. H. Chen	5280343	Quercetin	PTPRS
Panax notoginseng (Burkill) F. H. Chen	5280343	Quercetin	ESR2
Panax notoginseng (Burkill) F. H. Chen	5280343	Quercetin	MPG
Panax notoginseng (Burkill) F. H. Chen	5280343	Quercetin	SLC22A12
Panax notoginseng (Burkill) F. H. Chen	5280343	Quercetin	CDK5R1
Panax notoginseng (Burkill) F. H. Chen	5280343	Quercetin	CCNB3
Panax notoginseng (Burkill) F. H. Chen	5280343	Quercetin	CDK5
Panax notoginseng (Burkill) F. H. Chen	5280343	Quercetin	CCNB1
Panax notoginseng (Burkill) F. H. Chen	5280343	Quercetin	CCNB2
Panax notoginseng (Burkill) F. H. Chen	5280343	Quercetin	ARG1
Panax notoginseng (Burkill) F. H. Chen	5280343	Quercetin	CDK6
Panax notoginseng (Burkill) F. H. Chen	5280343	Quercetin	CDK2
Panax notoginseng (Burkill) F. H. Chen	5280343	Quercetin	TYR
Panax notoginseng (Burkill) F. H. Chen	5280343	Quercetin	HSD17B1
Panax notoginseng (Burkill) F. H. Chen	5280343	Quercetin	AHR
Panax notoginseng (Burkill) F. H. Chen	5280343	Quercetin	ESRRA
Panax notoginseng (Burkill) F. H. Chen	5280343	Quercetin	APP
Panax notoginseng (Burkill) F. H. Chen	5280343	Quercetin	PARP1
Panax notoginseng (Burkill) F. H. Chen	5280343	Quercetin	TTR
Panax notoginseng (Burkill) F. H. Chen	5280343	Quercetin	MMP12
Panax notoginseng (Burkill) F. H. Chen	5280343	Quercetin	CD38
Panax notoginseng (Burkill) F. H. Chen	5280343	Quercetin	AKR1B10
Panax notoginseng (Burkill) F. H. Chen	5280343	Quercetin	TNKS2
Panax notoginseng (Burkill) F. H. Chen	5280343	Quercetin	TNKS
Panax notoginseng (Burkill) F. H. Chen	5280343	Quercetin	TOP1
Panax notoginseng (Burkill) F. H. Chen	5280343	Quercetin	TERT
Panax notoginseng (Burkill) F. H. Chen	5281515	beta-Caryophyllene	PPARA
Panax notoginseng (Burkill) F. H. Chen	5281515	beta-Caryophyllene	CNR2
Panax notoginseng (Burkill) F. H. Chen	5281515	beta-Caryophyllene	FAAH
Panax notoginseng (Burkill) F. H. Chen	5281515	beta-Caryophyllene	TRPV1
Panax notoginseng (Burkill) F. H. Chen	5317844	alpha-Guaiene	PPARA
Panax notoginseng (Burkill) F. H. Chen	5317844	alpha-Guaiene	CNR2
Panax notoginseng (Burkill) F. H. Chen	5317844	alpha-Guaiene	CXCR3
Panax notoginseng (Burkill) F. H. Chen	5317844	alpha-Guaiene	NR1I3
Panax notoginseng (Burkill) F. H. Chen	107152	Azulene, 1,2,3,4,5,6,7,8-octahydro-1,4-dimethyl-7-(1-methylethenyl)-, (1S,4S,7R)-	PPARA
Panax notoginseng (Burkill) F. H. Chen	107152	Azulene, 1,2,3,4,5,6,7,8-octahydro-1,4-dimethyl-7-(1-methylethenyl)-, (1S,4S,7R)-	CNR2
Panax notoginseng (Burkill) F. H. Chen	107152	Azulene, 1,2,3,4,5,6,7,8-octahydro-1,4-dimethyl-7-(1-methylethenyl)-, (1S,4S,7R)-	CXCR3
Panax notoginseng (Burkill) F. H. Chen	107152	Azulene, 1,2,3,4,5,6,7,8-octahydro-1,4-dimethyl-7-(1-methylethenyl)-, (1S,4S,7R)-	MAOB
Panax notoginseng (Burkill) F. H. Chen	107152	Azulene, 1,2,3,4,5,6,7,8-octahydro-1,4-dimethyl-7-(1-methylethenyl)-, (1S,4S,7R)-	NR1I3
Panax notoginseng (Burkill) F. H. Chen	8094	Heptanoic acid	FABP2
Panax notoginseng (Burkill) F. H. Chen	8094	Heptanoic acid	FABP5
Panax notoginseng (Burkill) F. H. Chen	8094	Heptanoic acid	FFAR1
Panax notoginseng (Burkill) F. H. Chen	8094	Heptanoic acid	PPARD
Panax notoginseng (Burkill) F. H. Chen	8094	Heptanoic acid	NR1H4
Panax notoginseng (Burkill) F. H. Chen	8094	Heptanoic acid	CDC25A
Panax notoginseng (Burkill) F. H. Chen	8094	Heptanoic acid	GPBAR1
Panax notoginseng (Burkill) F. H. Chen	8094	Heptanoic acid	VDR
Panax notoginseng (Burkill) F. H. Chen	8094	Heptanoic acid	AR
Panax notoginseng (Burkill) F. H. Chen	8094	Heptanoic acid	POLB
Panax notoginseng (Burkill) F. H. Chen	8094	Heptanoic acid	PPARA
Panax notoginseng (Burkill) F. H. Chen	8094	Heptanoic acid	HSD11B1
Panax notoginseng (Burkill) F. H. Chen	8094	Heptanoic acid	PHF8
Panax notoginseng (Burkill) F. H. Chen	8094	Heptanoic acid	KDM5C
Panax notoginseng (Burkill) F. H. Chen	8094	Heptanoic acid	GABBR1
Panax notoginseng (Burkill) F. H. Chen	8094	Heptanoic acid	HSD17B3
Panax notoginseng (Burkill) F. H. Chen	8094	Heptanoic acid	UGT2B7
Panax notoginseng (Burkill) F. H. Chen	8094	Heptanoic acid	CYP19A1
Panax notoginseng (Burkill) F. H. Chen	8094	Heptanoic acid	SHBG
Panax notoginseng (Burkill) F. H. Chen	8094	Heptanoic acid	SERPINA6
Panax notoginseng (Burkill) F. H. Chen	8094	Heptanoic acid	G6PD
Panax notoginseng (Burkill) F. H. Chen	8094	Heptanoic acid	PTGFR
Panax notoginseng (Burkill) F. H. Chen	8094	Heptanoic acid	GABRA2
Panax notoginseng (Burkill) F. H. Chen	8094	Heptanoic acid	GABRB2
Panax notoginseng (Burkill) F. H. Chen	8094	Heptanoic acid	GABRG2
Panax notoginseng (Burkill) F. H. Chen	8094	Heptanoic acid	NPC1L1
Panax notoginseng (Burkill) F. H. Chen	8094	Heptanoic acid	FNTA
Panax notoginseng (Burkill) F. H. Chen	8094	Heptanoic acid	FNTB
Panax notoginseng (Burkill) F. H. Chen	8094	Heptanoic acid	KDM2A
Panax notoginseng (Burkill) F. H. Chen	8094	Heptanoic acid	FABP4
Panax notoginseng (Burkill) F. H. Chen	8094	Heptanoic acid	FABP3
Panax notoginseng (Burkill) F. H. Chen	8094	Heptanoic acid	AKR1B10
Panax notoginseng (Burkill) F. H. Chen	8094	Heptanoic acid	SLC22A6
Panax notoginseng (Burkill) F. H. Chen	8094	Heptanoic acid	HAO1
Panax notoginseng (Burkill) F. H. Chen	8094	Heptanoic acid	HSD11B2
Panax notoginseng (Burkill) F. H. Chen	8094	Heptanoic acid	PLG
Panax notoginseng (Burkill) F. H. Chen	8094	Heptanoic acid	GSTK1
Panax notoginseng (Burkill) F. H. Chen	8094	Heptanoic acid	PTPN1
Panax notoginseng (Burkill) F. H. Chen	8094	Heptanoic acid	SAE1
Panax notoginseng (Burkill) F. H. Chen	8094	Heptanoic acid	UBA2
Panax notoginseng (Burkill) F. H. Chen	8094	Heptanoic acid	CA2
Panax notoginseng (Burkill) F. H. Chen	8094	Heptanoic acid	CA1
Panax notoginseng (Burkill) F. H. Chen	8094	Heptanoic acid	CDC45
Panax notoginseng (Burkill) F. H. Chen	8094	Heptanoic acid	PTPRC
Panax notoginseng (Burkill) F. H. Chen	8094	Heptanoic acid	PTGER2
Panax notoginseng (Burkill) F. H. Chen	8094	Heptanoic acid	FDFT1
Panax notoginseng (Burkill) F. H. Chen	8094	Heptanoic acid	CACNA2D1
Panax notoginseng (Burkill) F. H. Chen	8094	Heptanoic acid	GRM5
Panax notoginseng (Burkill) F. H. Chen	8094	Heptanoic acid	PTGES
Panax notoginseng (Burkill) F. H. Chen	8158	Nonanoic acid	FABP4
Panax notoginseng (Burkill) F. H. Chen	8158	Nonanoic acid	FABP3
Panax notoginseng (Burkill) F. H. Chen	8158	Nonanoic acid	SLC22A6
Panax notoginseng (Burkill) F. H. Chen	8158	Nonanoic acid	FABP5
Panax notoginseng (Burkill) F. H. Chen	8158	Nonanoic acid	FABP2
Panax notoginseng (Burkill) F. H. Chen	8158	Nonanoic acid	PPARA
Panax notoginseng (Burkill) F. H. Chen	8158	Nonanoic acid	FFAR1
Panax notoginseng (Burkill) F. H. Chen	8158	Nonanoic acid	VDR
Panax notoginseng (Burkill) F. H. Chen	8158	Nonanoic acid	NR1H4
Panax notoginseng (Burkill) F. H. Chen	8158	Nonanoic acid	POLB
Panax notoginseng (Burkill) F. H. Chen	8158	Nonanoic acid	GPBAR1
Panax notoginseng (Burkill) F. H. Chen	8158	Nonanoic acid	HSD11B1
Panax notoginseng (Burkill) F. H. Chen	8158	Nonanoic acid	PHF8
Panax notoginseng (Burkill) F. H. Chen	8158	Nonanoic acid	SERPINA6
Panax notoginseng (Burkill) F. H. Chen	8158	Nonanoic acid	SHBG
Panax notoginseng (Burkill) F. H. Chen	8158	Nonanoic acid	HSD17B3
Panax notoginseng (Burkill) F. H. Chen	8158	Nonanoic acid	G6PD
Panax notoginseng (Burkill) F. H. Chen	8158	Nonanoic acid	GABBR1
Panax notoginseng (Burkill) F. H. Chen	8158	Nonanoic acid	AKR1B10
Panax notoginseng (Burkill) F. H. Chen	8158	Nonanoic acid	PPARD
Panax notoginseng (Burkill) F. H. Chen	8158	Nonanoic acid	PTGER2
Panax notoginseng (Burkill) F. H. Chen	8158	Nonanoic acid	AR
Panax notoginseng (Burkill) F. H. Chen	8158	Nonanoic acid	PTGFR
Panax notoginseng (Burkill) F. H. Chen	8158	Nonanoic acid	FNTA
Panax notoginseng (Burkill) F. H. Chen	8158	Nonanoic acid	FNTB
Panax notoginseng (Burkill) F. H. Chen	8158	Nonanoic acid	NPC1L1
Panax notoginseng (Burkill) F. H. Chen	8158	Nonanoic acid	HSD11B2
Panax notoginseng (Burkill) F. H. Chen	8158	Nonanoic acid	KDM2A
Panax notoginseng (Burkill) F. H. Chen	8158	Nonanoic acid	CDC25A
Panax notoginseng (Burkill) F. H. Chen	8158	Nonanoic acid	PLG
Panax notoginseng (Burkill) F. H. Chen	8158	Nonanoic acid	GSTK1
Panax notoginseng (Burkill) F. H. Chen	8158	Nonanoic acid	LTA4H
Panax notoginseng (Burkill) F. H. Chen	8158	Nonanoic acid	SAE1
Panax notoginseng (Burkill) F. H. Chen	8158	Nonanoic acid	UBA2
Panax notoginseng (Burkill) F. H. Chen	8158	Nonanoic acid	CXCL8
Panax notoginseng (Burkill) F. H. Chen	8158	Nonanoic acid	KDM5C
Panax notoginseng (Burkill) F. H. Chen	8158	Nonanoic acid	UGT2B7
Panax notoginseng (Burkill) F. H. Chen	8158	Nonanoic acid	CYP19A1
Panax notoginseng (Burkill) F. H. Chen	8158	Nonanoic acid	CDC45
Panax notoginseng (Burkill) F. H. Chen	8158	Nonanoic acid	PTPRC
Panax notoginseng (Burkill) F. H. Chen	8158	Nonanoic acid	HAO1
Panax notoginseng (Burkill) F. H. Chen	8158	Nonanoic acid	AKR1B1
Panax notoginseng (Burkill) F. H. Chen	8158	Nonanoic acid	PTGS2
Panax notoginseng (Burkill) F. H. Chen	8158	Nonanoic acid	CA2
Panax notoginseng (Burkill) F. H. Chen	8158	Nonanoic acid	CA1
Panax notoginseng (Burkill) F. H. Chen	8158	Nonanoic acid	CACNA2D1
Panax notoginseng (Burkill) F. H. Chen	8158	Nonanoic acid	CHRNA7
Panax notoginseng (Burkill) F. H. Chen	8158	Nonanoic acid	SRD5A1
Panax notoginseng (Burkill) F. H. Chen	8158	Nonanoic acid	SLC22A12
Panax notoginseng (Burkill) F. H. Chen	8158	Nonanoic acid	PTGER3
Panax notoginseng (Burkill) F. H. Chen	8158	Nonanoic acid	NOTUM
Panax notoginseng (Burkill) F. H. Chen	8158	Nonanoic acid	BCAT2
Panax notoginseng (Burkill) F. H. Chen	8158	Nonanoic acid	GRM5
Panax notoginseng (Burkill) F. H. Chen	8158	Nonanoic acid	PTGES
Panax notoginseng (Burkill) F. H. Chen	8158	Nonanoic acid	FDFT1
Panax notoginseng (Burkill) F. H. Chen	8158	Nonanoic acid	DUSP3
Panax notoginseng (Burkill) F. H. Chen	8158	Nonanoic acid	PTGDR
Panax notoginseng (Burkill) F. H. Chen	8158	Nonanoic acid	PTGDR2
Panax notoginseng (Burkill) F. H. Chen	12303902	Unii-0V56hxq8N5	PPARA
Panax notoginseng (Burkill) F. H. Chen	12303902	Unii-0V56hxq8N5	CNR2
Panax notoginseng (Burkill) F. H. Chen	12303902	Unii-0V56hxq8N5	AR
Panax notoginseng (Burkill) F. H. Chen	12303902	Unii-0V56hxq8N5	CYP19A1
Panax notoginseng (Burkill) F. H. Chen	12303902	Unii-0V56hxq8N5	ESR1
Panax notoginseng (Burkill) F. H. Chen	12303902	Unii-0V56hxq8N5	CHRM2
Panax notoginseng (Burkill) F. H. Chen	12303902	Unii-0V56hxq8N5	ACHE
Panax notoginseng (Burkill) F. H. Chen	12303902	Unii-0V56hxq8N5	SLC6A2
Panax notoginseng (Burkill) F. H. Chen	12303902	Unii-0V56hxq8N5	SLC6A4
Panax notoginseng (Burkill) F. H. Chen	12303902	Unii-0V56hxq8N5	CYP2C19
Panax notoginseng (Burkill) F. H. Chen	12303902	Unii-0V56hxq8N5	BCHE
Panax notoginseng (Burkill) F. H. Chen	12303902	Unii-0V56hxq8N5	PTPN1
Panax notoginseng (Burkill) F. H. Chen	12303902	Unii-0V56hxq8N5	NR1I3
Panax notoginseng (Burkill) F. H. Chen	12303902	Unii-0V56hxq8N5	FAAH
Panax notoginseng (Burkill) F. H. Chen	12303902	Unii-0V56hxq8N5	TRPV1
Panax notoginseng (Burkill) F. H. Chen	86895	Cuparene	HTR2A
Panax notoginseng (Burkill) F. H. Chen	86895	Cuparene	CNR1
Panax notoginseng (Burkill) F. H. Chen	86895	Cuparene	CNR2
Panax notoginseng (Burkill) F. H. Chen	86895	Cuparene	SHH
Panax notoginseng (Burkill) F. H. Chen	86895	Cuparene	SLC6A3
Panax notoginseng (Burkill) F. H. Chen	86895	Cuparene	ADRA2A
Panax notoginseng (Burkill) F. H. Chen	86895	Cuparene	ADRA2C
Panax notoginseng (Burkill) F. H. Chen	86895	Cuparene	ADRA2B
Panax notoginseng (Burkill) F. H. Chen	86895	Cuparene	ESR1
Panax notoginseng (Burkill) F. H. Chen	86895	Cuparene	CHRM2
Panax notoginseng (Burkill) F. H. Chen	86895	Cuparene	CHRM1
Panax notoginseng (Burkill) F. H. Chen	86895	Cuparene	SLC6A2
Panax notoginseng (Burkill) F. H. Chen	86895	Cuparene	HTR2C
Panax notoginseng (Burkill) F. H. Chen	86895	Cuparene	SLC6A4
Panax notoginseng (Burkill) F. H. Chen	86895	Cuparene	PTGS2
Panax notoginseng (Burkill) F. H. Chen	86895	Cuparene	TACR2
Panax notoginseng (Burkill) F. H. Chen	86895	Cuparene	CHRM3
Panax notoginseng (Burkill) F. H. Chen	86895	Cuparene	ADRB3
Panax notoginseng (Burkill) F. H. Chen	86895	Cuparene	ADORA3
Panax notoginseng (Burkill) F. H. Chen	86895	Cuparene	SHBG
Panax notoginseng (Burkill) F. H. Chen	86895	Cuparene	UGT2B7
Panax notoginseng (Burkill) F. H. Chen	86895	Cuparene	ACHE
Panax notoginseng (Burkill) F. H. Chen	86895	Cuparene	MAOA
Panax notoginseng (Burkill) F. H. Chen	86895	Cuparene	KDM1A
Panax notoginseng (Burkill) F. H. Chen	86895	Cuparene	S1PR5
Panax notoginseng (Burkill) F. H. Chen	86895	Cuparene	SPHK2
Panax notoginseng (Burkill) F. H. Chen	86895	Cuparene	S1PR4
Panax notoginseng (Burkill) F. H. Chen	86895	Cuparene	S1PR3
Panax notoginseng (Burkill) F. H. Chen	86895	Cuparene	S1PR1
Panax notoginseng (Burkill) F. H. Chen	86895	Cuparene	THRB
Panax notoginseng (Burkill) F. H. Chen	86895	Cuparene	AR
Panax notoginseng (Burkill) F. H. Chen	86895	Cuparene	IGF1R
Panax notoginseng (Burkill) F. H. Chen	5325711	(3S,8AR)-3-methylhexahydropyrrolo[1,2-a]pyrazine-1,4-dione	XIAP
Panax notoginseng (Burkill) F. H. Chen	5325711	(3S,8AR)-3-methylhexahydropyrrolo[1,2-a]pyrazine-1,4-dione	BIRC3
Panax notoginseng (Burkill) F. H. Chen	5325711	(3S,8AR)-3-methylhexahydropyrrolo[1,2-a]pyrazine-1,4-dione	BIRC2
Panax notoginseng (Burkill) F. H. Chen	5325711	(3S,8AR)-3-methylhexahydropyrrolo[1,2-a]pyrazine-1,4-dione	CTSB
Panax notoginseng (Burkill) F. H. Chen	5325711	(3S,8AR)-3-methylhexahydropyrrolo[1,2-a]pyrazine-1,4-dione	DPP4
Panax notoginseng (Burkill) F. H. Chen	5325711	(3S,8AR)-3-methylhexahydropyrrolo[1,2-a]pyrazine-1,4-dione	KLKB1
Panax notoginseng (Burkill) F. H. Chen	5325711	(3S,8AR)-3-methylhexahydropyrrolo[1,2-a]pyrazine-1,4-dione	CAPN1
Panax notoginseng (Burkill) F. H. Chen	5325711	(3S,8AR)-3-methylhexahydropyrrolo[1,2-a]pyrazine-1,4-dione	CAPNS1
Panax notoginseng (Burkill) F. H. Chen	5325711	(3S,8AR)-3-methylhexahydropyrrolo[1,2-a]pyrazine-1,4-dione	CELA1
Panax notoginseng (Burkill) F. H. Chen	5325711	(3S,8AR)-3-methylhexahydropyrrolo[1,2-a]pyrazine-1,4-dione	TRHR
Panax notoginseng (Burkill) F. H. Chen	5325711	(3S,8AR)-3-methylhexahydropyrrolo[1,2-a]pyrazine-1,4-dione	DRD2
Panax notoginseng (Burkill) F. H. Chen	5325711	(3S,8AR)-3-methylhexahydropyrrolo[1,2-a]pyrazine-1,4-dione	F2
Panax notoginseng (Burkill) F. H. Chen	5325711	(3S,8AR)-3-methylhexahydropyrrolo[1,2-a]pyrazine-1,4-dione	PRSS1
Panax notoginseng (Burkill) F. H. Chen	5325711	(3S,8AR)-3-methylhexahydropyrrolo[1,2-a]pyrazine-1,4-dione	P2RX7
Panax notoginseng (Burkill) F. H. Chen	5325711	(3S,8AR)-3-methylhexahydropyrrolo[1,2-a]pyrazine-1,4-dione	PREP
Panax notoginseng (Burkill) F. H. Chen	5325711	(3S,8AR)-3-methylhexahydropyrrolo[1,2-a]pyrazine-1,4-dione	PARP1
Panax notoginseng (Burkill) F. H. Chen	5325711	(3S,8AR)-3-methylhexahydropyrrolo[1,2-a]pyrazine-1,4-dione	SIGMAR1
Panax notoginseng (Burkill) F. H. Chen	5325711	(3S,8AR)-3-methylhexahydropyrrolo[1,2-a]pyrazine-1,4-dione	HSD11B1
Panax notoginseng (Burkill) F. H. Chen	5325711	(3S,8AR)-3-methylhexahydropyrrolo[1,2-a]pyrazine-1,4-dione	HDAC4
Panax notoginseng (Burkill) F. H. Chen	5325711	(3S,8AR)-3-methylhexahydropyrrolo[1,2-a]pyrazine-1,4-dione	DPP7
Panax notoginseng (Burkill) F. H. Chen	5325711	(3S,8AR)-3-methylhexahydropyrrolo[1,2-a]pyrazine-1,4-dione	KISS1R
Panax notoginseng (Burkill) F. H. Chen	5325711	(3S,8AR)-3-methylhexahydropyrrolo[1,2-a]pyrazine-1,4-dione	ELANE
Panax notoginseng (Burkill) F. H. Chen	5325711	(3S,8AR)-3-methylhexahydropyrrolo[1,2-a]pyrazine-1,4-dione	CACNA1H
Panax notoginseng (Burkill) F. H. Chen	5325711	(3S,8AR)-3-methylhexahydropyrrolo[1,2-a]pyrazine-1,4-dione	F10
Panax notoginseng (Burkill) F. H. Chen	5325711	(3S,8AR)-3-methylhexahydropyrrolo[1,2-a]pyrazine-1,4-dione	DPP8
Panax notoginseng (Burkill) F. H. Chen	5325711	(3S,8AR)-3-methylhexahydropyrrolo[1,2-a]pyrazine-1,4-dione	DPP9
Panax notoginseng (Burkill) F. H. Chen	5325711	(3S,8AR)-3-methylhexahydropyrrolo[1,2-a]pyrazine-1,4-dione	WDR5
Panax notoginseng (Burkill) F. H. Chen	5325711	(3S,8AR)-3-methylhexahydropyrrolo[1,2-a]pyrazine-1,4-dione	CTSK
Panax notoginseng (Burkill) F. H. Chen	5325711	(3S,8AR)-3-methylhexahydropyrrolo[1,2-a]pyrazine-1,4-dione	GZMB
Panax notoginseng (Burkill) F. H. Chen	5325711	(3S,8AR)-3-methylhexahydropyrrolo[1,2-a]pyrazine-1,4-dione	XPNPEP1
Panax notoginseng (Burkill) F. H. Chen	5325711	(3S,8AR)-3-methylhexahydropyrrolo[1,2-a]pyrazine-1,4-dione	XPNPEP2
Panax notoginseng (Burkill) F. H. Chen	5325711	(3S,8AR)-3-methylhexahydropyrrolo[1,2-a]pyrazine-1,4-dione	CYP11B1
Panax notoginseng (Burkill) F. H. Chen	5325711	(3S,8AR)-3-methylhexahydropyrrolo[1,2-a]pyrazine-1,4-dione	CYP11B2
Panax notoginseng (Burkill) F. H. Chen	5325711	(3S,8AR)-3-methylhexahydropyrrolo[1,2-a]pyrazine-1,4-dione	MGLL
Panax notoginseng (Burkill) F. H. Chen	5325711	(3S,8AR)-3-methylhexahydropyrrolo[1,2-a]pyrazine-1,4-dione	CHRNA4
Panax notoginseng (Burkill) F. H. Chen	5325711	(3S,8AR)-3-methylhexahydropyrrolo[1,2-a]pyrazine-1,4-dione	CHRNB2
Panax notoginseng (Burkill) F. H. Chen	5325711	(3S,8AR)-3-methylhexahydropyrrolo[1,2-a]pyrazine-1,4-dione	TMPRSS6
Panax notoginseng (Burkill) F. H. Chen	5325711	(3S,8AR)-3-methylhexahydropyrrolo[1,2-a]pyrazine-1,4-dione	PLG
Panax notoginseng (Burkill) F. H. Chen	5325711	(3S,8AR)-3-methylhexahydropyrrolo[1,2-a]pyrazine-1,4-dione	HDAC2
Panax notoginseng (Burkill) F. H. Chen	5325711	(3S,8AR)-3-methylhexahydropyrrolo[1,2-a]pyrazine-1,4-dione	HPN
Panax notoginseng (Burkill) F. H. Chen	5325711	(3S,8AR)-3-methylhexahydropyrrolo[1,2-a]pyrazine-1,4-dione	NCOR2
Panax notoginseng (Burkill) F. H. Chen	5325711	(3S,8AR)-3-methylhexahydropyrrolo[1,2-a]pyrazine-1,4-dione	HDAC3
Panax notoginseng (Burkill) F. H. Chen	5325711	(3S,8AR)-3-methylhexahydropyrrolo[1,2-a]pyrazine-1,4-dione	HLA-A
Panax notoginseng (Burkill) F. H. Chen	5325711	(3S,8AR)-3-methylhexahydropyrrolo[1,2-a]pyrazine-1,4-dione	ST14
Panax notoginseng (Burkill) F. H. Chen	5325711	(3S,8AR)-3-methylhexahydropyrrolo[1,2-a]pyrazine-1,4-dione	HDAC11
Panax notoginseng (Burkill) F. H. Chen	5325711	(3S,8AR)-3-methylhexahydropyrrolo[1,2-a]pyrazine-1,4-dione	HGFAC
Panax notoginseng (Burkill) F. H. Chen	5325711	(3S,8AR)-3-methylhexahydropyrrolo[1,2-a]pyrazine-1,4-dione	HDAC10
Panax notoginseng (Burkill) F. H. Chen	5325711	(3S,8AR)-3-methylhexahydropyrrolo[1,2-a]pyrazine-1,4-dione	MCL1
Panax notoginseng (Burkill) F. H. Chen	5325711	(3S,8AR)-3-methylhexahydropyrrolo[1,2-a]pyrazine-1,4-dione	ACE
Panax notoginseng (Burkill) F. H. Chen	5325711	(3S,8AR)-3-methylhexahydropyrrolo[1,2-a]pyrazine-1,4-dione	NAAA
Panax notoginseng (Burkill) F. H. Chen	5325711	(3S,8AR)-3-methylhexahydropyrrolo[1,2-a]pyrazine-1,4-dione	HDAC6
Panax notoginseng (Burkill) F. H. Chen	5325711	(3S,8AR)-3-methylhexahydropyrrolo[1,2-a]pyrazine-1,4-dione	HDAC1
Panax notoginseng (Burkill) F. H. Chen	5325711	(3S,8AR)-3-methylhexahydropyrrolo[1,2-a]pyrazine-1,4-dione	PARP3
Panax notoginseng (Burkill) F. H. Chen	5325711	(3S,8AR)-3-methylhexahydropyrrolo[1,2-a]pyrazine-1,4-dione	FURIN
Panax notoginseng (Burkill) F. H. Chen	5325711	(3S,8AR)-3-methylhexahydropyrrolo[1,2-a]pyrazine-1,4-dione	PCSK6
Panax notoginseng (Burkill) F. H. Chen	5325711	(3S,8AR)-3-methylhexahydropyrrolo[1,2-a]pyrazine-1,4-dione	ANPEP
Panax notoginseng (Burkill) F. H. Chen	5325711	(3S,8AR)-3-methylhexahydropyrrolo[1,2-a]pyrazine-1,4-dione	TPSAB1
Panax notoginseng (Burkill) F. H. Chen	5325711	(3S,8AR)-3-methylhexahydropyrrolo[1,2-a]pyrazine-1,4-dione	PGC
Panax notoginseng (Burkill) F. H. Chen	5325711	(3S,8AR)-3-methylhexahydropyrrolo[1,2-a]pyrazine-1,4-dione	SIRT2
Panax notoginseng (Burkill) F. H. Chen	5325711	(3S,8AR)-3-methylhexahydropyrrolo[1,2-a]pyrazine-1,4-dione	MEN1
Panax notoginseng (Burkill) F. H. Chen	5325711	(3S,8AR)-3-methylhexahydropyrrolo[1,2-a]pyrazine-1,4-dione	TNFRSF10A
Panax notoginseng (Burkill) F. H. Chen	5325711	(3S,8AR)-3-methylhexahydropyrrolo[1,2-a]pyrazine-1,4-dione	LAP3
Panax notoginseng (Burkill) F. H. Chen	5325711	(3S,8AR)-3-methylhexahydropyrrolo[1,2-a]pyrazine-1,4-dione	PEPD
Panax notoginseng (Burkill) F. H. Chen	5325711	(3S,8AR)-3-methylhexahydropyrrolo[1,2-a]pyrazine-1,4-dione	HDAC8
Panax notoginseng (Burkill) F. H. Chen	5325711	(3S,8AR)-3-methylhexahydropyrrolo[1,2-a]pyrazine-1,4-dione	ALOX5
Panax notoginseng (Burkill) F. H. Chen	5325711	(3S,8AR)-3-methylhexahydropyrrolo[1,2-a]pyrazine-1,4-dione	CTSD
Panax notoginseng (Burkill) F. H. Chen	5325711	(3S,8AR)-3-methylhexahydropyrrolo[1,2-a]pyrazine-1,4-dione	SLC6A2
Panax notoginseng (Burkill) F. H. Chen	5325711	(3S,8AR)-3-methylhexahydropyrrolo[1,2-a]pyrazine-1,4-dione	SLC6A3
Panax notoginseng (Burkill) F. H. Chen	5325711	(3S,8AR)-3-methylhexahydropyrrolo[1,2-a]pyrazine-1,4-dione	CYP19A1
Panax notoginseng (Burkill) F. H. Chen	5325711	(3S,8AR)-3-methylhexahydropyrrolo[1,2-a]pyrazine-1,4-dione	SLC5A1
Panax notoginseng (Burkill) F. H. Chen	5325711	(3S,8AR)-3-methylhexahydropyrrolo[1,2-a]pyrazine-1,4-dione	ADORA3
Panax notoginseng (Burkill) F. H. Chen	5325711	(3S,8AR)-3-methylhexahydropyrrolo[1,2-a]pyrazine-1,4-dione	SYK
Panax notoginseng (Burkill) F. H. Chen	5325711	(3S,8AR)-3-methylhexahydropyrrolo[1,2-a]pyrazine-1,4-dione	NTSR1
Panax notoginseng (Burkill) F. H. Chen	5325711	(3S,8AR)-3-methylhexahydropyrrolo[1,2-a]pyrazine-1,4-dione	MMP3
Panax notoginseng (Burkill) F. H. Chen	5325711	(3S,8AR)-3-methylhexahydropyrrolo[1,2-a]pyrazine-1,4-dione	MMP7
Panax notoginseng (Burkill) F. H. Chen	5325711	(3S,8AR)-3-methylhexahydropyrrolo[1,2-a]pyrazine-1,4-dione	DNM1
Panax notoginseng (Burkill) F. H. Chen	5325711	(3S,8AR)-3-methylhexahydropyrrolo[1,2-a]pyrazine-1,4-dione	ITGA2B
Panax notoginseng (Burkill) F. H. Chen	5325711	(3S,8AR)-3-methylhexahydropyrrolo[1,2-a]pyrazine-1,4-dione	ITGB3
Panax notoginseng (Burkill) F. H. Chen	5325711	(3S,8AR)-3-methylhexahydropyrrolo[1,2-a]pyrazine-1,4-dione	HMOX1
Panax notoginseng (Burkill) F. H. Chen	5325711	(3S,8AR)-3-methylhexahydropyrrolo[1,2-a]pyrazine-1,4-dione	MAP2K1
Panax notoginseng (Burkill) F. H. Chen	5325711	(3S,8AR)-3-methylhexahydropyrrolo[1,2-a]pyrazine-1,4-dione	FKBP1A
Panax notoginseng (Burkill) F. H. Chen	5325711	(3S,8AR)-3-methylhexahydropyrrolo[1,2-a]pyrazine-1,4-dione	TLR9
Panax notoginseng (Burkill) F. H. Chen	5325711	(3S,8AR)-3-methylhexahydropyrrolo[1,2-a]pyrazine-1,4-dione	FPR2
Panax notoginseng (Burkill) F. H. Chen	5325711	(3S,8AR)-3-methylhexahydropyrrolo[1,2-a]pyrazine-1,4-dione	PDF
Panax notoginseng (Burkill) F. H. Chen	5325711	(3S,8AR)-3-methylhexahydropyrrolo[1,2-a]pyrazine-1,4-dione	ADORA2A
Panax notoginseng (Burkill) F. H. Chen	23278158	(3S,6R)-3-Methyl-6-propan-2-ylpiperazine-2,5-dione	CTSB
Panax notoginseng (Burkill) F. H. Chen	23278158	(3S,6R)-3-Methyl-6-propan-2-ylpiperazine-2,5-dione	SIGMAR1
Panax notoginseng (Burkill) F. H. Chen	23278158	(3S,6R)-3-Methyl-6-propan-2-ylpiperazine-2,5-dione	CAPN1
Panax notoginseng (Burkill) F. H. Chen	23278158	(3S,6R)-3-Methyl-6-propan-2-ylpiperazine-2,5-dione	CAPNS1
Panax notoginseng (Burkill) F. H. Chen	23278158	(3S,6R)-3-Methyl-6-propan-2-ylpiperazine-2,5-dione	NAAA
Panax notoginseng (Burkill) F. H. Chen	23278158	(3S,6R)-3-Methyl-6-propan-2-ylpiperazine-2,5-dione	XIAP
Panax notoginseng (Burkill) F. H. Chen	23278158	(3S,6R)-3-Methyl-6-propan-2-ylpiperazine-2,5-dione	BIRC3
Panax notoginseng (Burkill) F. H. Chen	23278158	(3S,6R)-3-Methyl-6-propan-2-ylpiperazine-2,5-dione	BIRC2
Panax notoginseng (Burkill) F. H. Chen	23278158	(3S,6R)-3-Methyl-6-propan-2-ylpiperazine-2,5-dione	KISS1R
Panax notoginseng (Burkill) F. H. Chen	23278158	(3S,6R)-3-Methyl-6-propan-2-ylpiperazine-2,5-dione	PARP1
Panax notoginseng (Burkill) F. H. Chen	23278158	(3S,6R)-3-Methyl-6-propan-2-ylpiperazine-2,5-dione	CHRNA4
Panax notoginseng (Burkill) F. H. Chen	23278158	(3S,6R)-3-Methyl-6-propan-2-ylpiperazine-2,5-dione	CHRNB2
Panax notoginseng (Burkill) F. H. Chen	23278158	(3S,6R)-3-Methyl-6-propan-2-ylpiperazine-2,5-dione	PARP3
Panax notoginseng (Burkill) F. H. Chen	23278158	(3S,6R)-3-Methyl-6-propan-2-ylpiperazine-2,5-dione	F2
Panax notoginseng (Burkill) F. H. Chen	23278158	(3S,6R)-3-Methyl-6-propan-2-ylpiperazine-2,5-dione	PRSS1
Panax notoginseng (Burkill) F. H. Chen	23278158	(3S,6R)-3-Methyl-6-propan-2-ylpiperazine-2,5-dione	MTNR1A
Panax notoginseng (Burkill) F. H. Chen	23278158	(3S,6R)-3-Methyl-6-propan-2-ylpiperazine-2,5-dione	MTNR1B
Panax notoginseng (Burkill) F. H. Chen	23278158	(3S,6R)-3-Methyl-6-propan-2-ylpiperazine-2,5-dione	CYP11B1
Panax notoginseng (Burkill) F. H. Chen	23278158	(3S,6R)-3-Methyl-6-propan-2-ylpiperazine-2,5-dione	SYK
Panax notoginseng (Burkill) F. H. Chen	23278158	(3S,6R)-3-Methyl-6-propan-2-ylpiperazine-2,5-dione	CYP11B2
Panax notoginseng (Burkill) F. H. Chen	23278158	(3S,6R)-3-Methyl-6-propan-2-ylpiperazine-2,5-dione	MCL1
Panax notoginseng (Burkill) F. H. Chen	23278158	(3S,6R)-3-Methyl-6-propan-2-ylpiperazine-2,5-dione	MALT1
Panax notoginseng (Burkill) F. H. Chen	23278158	(3S,6R)-3-Methyl-6-propan-2-ylpiperazine-2,5-dione	PREP
Panax notoginseng (Burkill) F. H. Chen	23278158	(3S,6R)-3-Methyl-6-propan-2-ylpiperazine-2,5-dione	MAPK8
Panax notoginseng (Burkill) F. H. Chen	23278158	(3S,6R)-3-Methyl-6-propan-2-ylpiperazine-2,5-dione	CDK2
Panax notoginseng (Burkill) F. H. Chen	23278158	(3S,6R)-3-Methyl-6-propan-2-ylpiperazine-2,5-dione	CACNA1H
Panax notoginseng (Burkill) F. H. Chen	23278158	(3S,6R)-3-Methyl-6-propan-2-ylpiperazine-2,5-dione	CYP19A1
Panax notoginseng (Burkill) F. H. Chen	23278158	(3S,6R)-3-Methyl-6-propan-2-ylpiperazine-2,5-dione	ADORA3
Panax notoginseng (Burkill) F. H. Chen	23278158	(3S,6R)-3-Methyl-6-propan-2-ylpiperazine-2,5-dione	QPCT
Panax notoginseng (Burkill) F. H. Chen	23278158	(3S,6R)-3-Methyl-6-propan-2-ylpiperazine-2,5-dione	ALOX5
Panax notoginseng (Burkill) F. H. Chen	23278158	(3S,6R)-3-Methyl-6-propan-2-ylpiperazine-2,5-dione	HTR2B
Panax notoginseng (Burkill) F. H. Chen	23278158	(3S,6R)-3-Methyl-6-propan-2-ylpiperazine-2,5-dione	KDM4C
Panax notoginseng (Burkill) F. H. Chen	23278158	(3S,6R)-3-Methyl-6-propan-2-ylpiperazine-2,5-dione	DRD2
Panax notoginseng (Burkill) F. H. Chen	23278158	(3S,6R)-3-Methyl-6-propan-2-ylpiperazine-2,5-dione	KLKB1
Panax notoginseng (Burkill) F. H. Chen	23278158	(3S,6R)-3-Methyl-6-propan-2-ylpiperazine-2,5-dione	ADORA2A
Panax notoginseng (Burkill) F. H. Chen	23278158	(3S,6R)-3-Methyl-6-propan-2-ylpiperazine-2,5-dione	HMOX1
Panax notoginseng (Burkill) F. H. Chen	23278158	(3S,6R)-3-Methyl-6-propan-2-ylpiperazine-2,5-dione	MGLL
Panax notoginseng (Burkill) F. H. Chen	23278158	(3S,6R)-3-Methyl-6-propan-2-ylpiperazine-2,5-dione	ADORA1
Panax notoginseng (Burkill) F. H. Chen	23278158	(3S,6R)-3-Methyl-6-propan-2-ylpiperazine-2,5-dione	DHODH
Panax notoginseng (Burkill) F. H. Chen	23278158	(3S,6R)-3-Methyl-6-propan-2-ylpiperazine-2,5-dione	GSK3B
Panax notoginseng (Burkill) F. H. Chen	23278158	(3S,6R)-3-Methyl-6-propan-2-ylpiperazine-2,5-dione	TGM2
Panax notoginseng (Burkill) F. H. Chen	23278158	(3S,6R)-3-Methyl-6-propan-2-ylpiperazine-2,5-dione	MAOB
Panax notoginseng (Burkill) F. H. Chen	23278158	(3S,6R)-3-Methyl-6-propan-2-ylpiperazine-2,5-dione	DPP8
Panax notoginseng (Burkill) F. H. Chen	23278158	(3S,6R)-3-Methyl-6-propan-2-ylpiperazine-2,5-dione	CELA1
Panax notoginseng (Burkill) F. H. Chen	23278158	(3S,6R)-3-Methyl-6-propan-2-ylpiperazine-2,5-dione	P2RX7
Panax notoginseng (Burkill) F. H. Chen	23278158	(3S,6R)-3-Methyl-6-propan-2-ylpiperazine-2,5-dione	CTSK
Panax notoginseng (Burkill) F. H. Chen	23278158	(3S,6R)-3-Methyl-6-propan-2-ylpiperazine-2,5-dione	PDE7A
Panax notoginseng (Burkill) F. H. Chen	23278158	(3S,6R)-3-Methyl-6-propan-2-ylpiperazine-2,5-dione	TNKS2
Panax notoginseng (Burkill) F. H. Chen	23278158	(3S,6R)-3-Methyl-6-propan-2-ylpiperazine-2,5-dione	ADORA2B
Panax notoginseng (Burkill) F. H. Chen	23278158	(3S,6R)-3-Methyl-6-propan-2-ylpiperazine-2,5-dione	TLR9
Panax notoginseng (Burkill) F. H. Chen	23278158	(3S,6R)-3-Methyl-6-propan-2-ylpiperazine-2,5-dione	TAAR1
Panax notoginseng (Burkill) F. H. Chen	23278158	(3S,6R)-3-Methyl-6-propan-2-ylpiperazine-2,5-dione	TRHR
Panax notoginseng (Burkill) F. H. Chen	23278158	(3S,6R)-3-Methyl-6-propan-2-ylpiperazine-2,5-dione	DUSP3
Panax notoginseng (Burkill) F. H. Chen	23278158	(3S,6R)-3-Methyl-6-propan-2-ylpiperazine-2,5-dione	MAPKAPK2
Panax notoginseng (Burkill) F. H. Chen	23278158	(3S,6R)-3-Methyl-6-propan-2-ylpiperazine-2,5-dione	HSD11B1
Panax notoginseng (Burkill) F. H. Chen	23278158	(3S,6R)-3-Methyl-6-propan-2-ylpiperazine-2,5-dione	ACHE
Panax notoginseng (Burkill) F. H. Chen	23278158	(3S,6R)-3-Methyl-6-propan-2-ylpiperazine-2,5-dione	PTGS2
Panax notoginseng (Burkill) F. H. Chen	23278158	(3S,6R)-3-Methyl-6-propan-2-ylpiperazine-2,5-dione	ACE
Panax notoginseng (Burkill) F. H. Chen	23278158	(3S,6R)-3-Methyl-6-propan-2-ylpiperazine-2,5-dione	GRM4
Panax notoginseng (Burkill) F. H. Chen	23278158	(3S,6R)-3-Methyl-6-propan-2-ylpiperazine-2,5-dione	TRPA1
Panax notoginseng (Burkill) F. H. Chen	23278158	(3S,6R)-3-Methyl-6-propan-2-ylpiperazine-2,5-dione	CES1
Panax notoginseng (Burkill) F. H. Chen	23278158	(3S,6R)-3-Methyl-6-propan-2-ylpiperazine-2,5-dione	CES2
Panax notoginseng (Burkill) F. H. Chen	23278158	(3S,6R)-3-Methyl-6-propan-2-ylpiperazine-2,5-dione	CCNE2
Panax notoginseng (Burkill) F. H. Chen	23278158	(3S,6R)-3-Methyl-6-propan-2-ylpiperazine-2,5-dione	CCNB3
Panax notoginseng (Burkill) F. H. Chen	23278158	(3S,6R)-3-Methyl-6-propan-2-ylpiperazine-2,5-dione	CCND3
Panax notoginseng (Burkill) F. H. Chen	23278158	(3S,6R)-3-Methyl-6-propan-2-ylpiperazine-2,5-dione	CDK1
Panax notoginseng (Burkill) F. H. Chen	23278158	(3S,6R)-3-Methyl-6-propan-2-ylpiperazine-2,5-dione	CCND1
Panax notoginseng (Burkill) F. H. Chen	23278158	(3S,6R)-3-Methyl-6-propan-2-ylpiperazine-2,5-dione	CCNE1
Panax notoginseng (Burkill) F. H. Chen	23278158	(3S,6R)-3-Methyl-6-propan-2-ylpiperazine-2,5-dione	CCNB1
Panax notoginseng (Burkill) F. H. Chen	23278158	(3S,6R)-3-Methyl-6-propan-2-ylpiperazine-2,5-dione	CDK4
Panax notoginseng (Burkill) F. H. Chen	23278158	(3S,6R)-3-Methyl-6-propan-2-ylpiperazine-2,5-dione	CCNB2
Panax notoginseng (Burkill) F. H. Chen	23278158	(3S,6R)-3-Methyl-6-propan-2-ylpiperazine-2,5-dione	CCND2
Panax notoginseng (Burkill) F. H. Chen	23278158	(3S,6R)-3-Methyl-6-propan-2-ylpiperazine-2,5-dione	AURKB
Panax notoginseng (Burkill) F. H. Chen	23278158	(3S,6R)-3-Methyl-6-propan-2-ylpiperazine-2,5-dione	CSNK1G1
Panax notoginseng (Burkill) F. H. Chen	23278158	(3S,6R)-3-Methyl-6-propan-2-ylpiperazine-2,5-dione	RPS6KA1
Panax notoginseng (Burkill) F. H. Chen	23278158	(3S,6R)-3-Methyl-6-propan-2-ylpiperazine-2,5-dione	PDE4B
Panax notoginseng (Burkill) F. H. Chen	23278158	(3S,6R)-3-Methyl-6-propan-2-ylpiperazine-2,5-dione	CSNK1A1
Panax notoginseng (Burkill) F. H. Chen	23278158	(3S,6R)-3-Methyl-6-propan-2-ylpiperazine-2,5-dione	KDR
Panax notoginseng (Burkill) F. H. Chen	23278158	(3S,6R)-3-Methyl-6-propan-2-ylpiperazine-2,5-dione	JAK1
Panax notoginseng (Burkill) F. H. Chen	23278158	(3S,6R)-3-Methyl-6-propan-2-ylpiperazine-2,5-dione	JAK2
Panax notoginseng (Burkill) F. H. Chen	23278158	(3S,6R)-3-Methyl-6-propan-2-ylpiperazine-2,5-dione	ROCK1
Panax notoginseng (Burkill) F. H. Chen	23278158	(3S,6R)-3-Methyl-6-propan-2-ylpiperazine-2,5-dione	TYK2
Panax notoginseng (Burkill) F. H. Chen	23278158	(3S,6R)-3-Methyl-6-propan-2-ylpiperazine-2,5-dione	MAPK1
Panax notoginseng (Burkill) F. H. Chen	23278158	(3S,6R)-3-Methyl-6-propan-2-ylpiperazine-2,5-dione	PARP2
Panax notoginseng (Burkill) F. H. Chen	23278158	(3S,6R)-3-Methyl-6-propan-2-ylpiperazine-2,5-dione	GRK6
Panax notoginseng (Burkill) F. H. Chen	23278158	(3S,6R)-3-Methyl-6-propan-2-ylpiperazine-2,5-dione	RGS4
Panax notoginseng (Burkill) F. H. Chen	23278158	(3S,6R)-3-Methyl-6-propan-2-ylpiperazine-2,5-dione	KCNN1
Panax notoginseng (Burkill) F. H. Chen	23278158	(3S,6R)-3-Methyl-6-propan-2-ylpiperazine-2,5-dione	KCNN3
Panax notoginseng (Burkill) F. H. Chen	23278158	(3S,6R)-3-Methyl-6-propan-2-ylpiperazine-2,5-dione	KCNN2
Panax notoginseng (Burkill) F. H. Chen	23278158	(3S,6R)-3-Methyl-6-propan-2-ylpiperazine-2,5-dione	GABRB3
Panax notoginseng (Burkill) F. H. Chen	23278158	(3S,6R)-3-Methyl-6-propan-2-ylpiperazine-2,5-dione	GABRG2
Panax notoginseng (Burkill) F. H. Chen	23278158	(3S,6R)-3-Methyl-6-propan-2-ylpiperazine-2,5-dione	GABRA5
Panax notoginseng (Burkill) F. H. Chen	23278158	(3S,6R)-3-Methyl-6-propan-2-ylpiperazine-2,5-dione	PDE5A
Panax notoginseng (Burkill) F. H. Chen	23278158	(3S,6R)-3-Methyl-6-propan-2-ylpiperazine-2,5-dione	PDE3A
Panax notoginseng (Burkill) F. H. Chen	23278158	(3S,6R)-3-Methyl-6-propan-2-ylpiperazine-2,5-dione	PDE3B
Panax notoginseng (Burkill) F. H. Chen	23278158	(3S,6R)-3-Methyl-6-propan-2-ylpiperazine-2,5-dione	KAT2B
Panax notoginseng (Burkill) F. H. Chen	23278158	(3S,6R)-3-Methyl-6-propan-2-ylpiperazine-2,5-dione	HLA-A
Panax notoginseng (Burkill) F. H. Chen	23278158	(3S,6R)-3-Methyl-6-propan-2-ylpiperazine-2,5-dione	BRD4
Panax notoginseng (Burkill) F. H. Chen	23278158	(3S,6R)-3-Methyl-6-propan-2-ylpiperazine-2,5-dione	CHRM4
Panax notoginseng (Burkill) F. H. Chen	23278158	(3S,6R)-3-Methyl-6-propan-2-ylpiperazine-2,5-dione	CHRM5
Panax notoginseng (Burkill) F. H. Chen	23278158	(3S,6R)-3-Methyl-6-propan-2-ylpiperazine-2,5-dione	TERT
Panax notoginseng (Burkill) F. H. Chen	23278158	(3S,6R)-3-Methyl-6-propan-2-ylpiperazine-2,5-dione	CA14
Panax notoginseng (Burkill) F. H. Chen	23278158	(3S,6R)-3-Methyl-6-propan-2-ylpiperazine-2,5-dione	DPP7
Panax notoginseng (Burkill) F. H. Chen	23278158	(3S,6R)-3-Methyl-6-propan-2-ylpiperazine-2,5-dione	GABRA2
Panax notoginseng (Burkill) F. H. Chen	23278158	(3S,6R)-3-Methyl-6-propan-2-ylpiperazine-2,5-dione	GABRA3
Panax notoginseng (Burkill) F. H. Chen	23278158	(3S,6R)-3-Methyl-6-propan-2-ylpiperazine-2,5-dione	GABRA1
Panax notoginseng (Burkill) F. H. Chen	23278158	(3S,6R)-3-Methyl-6-propan-2-ylpiperazine-2,5-dione	MMP2
Panax notoginseng (Burkill) F. H. Chen	23278158	(3S,6R)-3-Methyl-6-propan-2-ylpiperazine-2,5-dione	ELANE
Panax notoginseng (Burkill) F. H. Chen	23278158	(3S,6R)-3-Methyl-6-propan-2-ylpiperazine-2,5-dione	MMP1
Panax notoginseng (Burkill) F. H. Chen	23278158	(3S,6R)-3-Methyl-6-propan-2-ylpiperazine-2,5-dione	CTSS
Panax notoginseng (Burkill) F. H. Chen	441005	(+)-delta-Cadinene	PPARA
Panax notoginseng (Burkill) F. H. Chen	441005	(+)-delta-Cadinene	CNR2
Panax notoginseng (Burkill) F. H. Chen	441005	(+)-delta-Cadinene	TRPV1
Panax notoginseng (Burkill) F. H. Chen	441005	(+)-delta-Cadinene	GLI2
Panax notoginseng (Burkill) F. H. Chen	441005	(+)-delta-Cadinene	GLI1
Panax notoginseng (Burkill) F. H. Chen	31404	Butylated hydroxytoluene	CA2
Panax notoginseng (Burkill) F. H. Chen	31404	Butylated hydroxytoluene	GABRA1
Panax notoginseng (Burkill) F. H. Chen	31404	Butylated hydroxytoluene	GABRB2
Panax notoginseng (Burkill) F. H. Chen	31404	Butylated hydroxytoluene	GABRG2
Panax notoginseng (Burkill) F. H. Chen	31404	Butylated hydroxytoluene	HTR2B
Panax notoginseng (Burkill) F. H. Chen	31404	Butylated hydroxytoluene	GABRB3
Panax notoginseng (Burkill) F. H. Chen	31404	Butylated hydroxytoluene	PTGS1
Panax notoginseng (Burkill) F. H. Chen	31404	Butylated hydroxytoluene	SLC6A2
Panax notoginseng (Burkill) F. H. Chen	31404	Butylated hydroxytoluene	HTR2C
Panax notoginseng (Burkill) F. H. Chen	31404	Butylated hydroxytoluene	GABBR2
Panax notoginseng (Burkill) F. H. Chen	31404	Butylated hydroxytoluene	GABBR1
Panax notoginseng (Burkill) F. H. Chen	31404	Butylated hydroxytoluene	RORC
Panax notoginseng (Burkill) F. H. Chen	31404	Butylated hydroxytoluene	ESRRG
Panax notoginseng (Burkill) F. H. Chen	31404	Butylated hydroxytoluene	TRPA1
Panax notoginseng (Burkill) F. H. Chen	31404	Butylated hydroxytoluene	ESR2
Panax notoginseng (Burkill) F. H. Chen	31404	Butylated hydroxytoluene	ESR1
Panax notoginseng (Burkill) F. H. Chen	31404	Butylated hydroxytoluene	HTR6
Panax notoginseng (Burkill) F. H. Chen	31404	Butylated hydroxytoluene	TYR
Panax notoginseng (Burkill) F. H. Chen	31404	Butylated hydroxytoluene	NOS1
Panax notoginseng (Burkill) F. H. Chen	31404	Butylated hydroxytoluene	NOS3
Panax notoginseng (Burkill) F. H. Chen	12306049	(+)-alpha-Muurolene	PPARA
Panax notoginseng (Burkill) F. H. Chen	12306049	(+)-alpha-Muurolene	CNR2
Panax notoginseng (Burkill) F. H. Chen	12306049	(+)-alpha-Muurolene	NR1H3
Panax notoginseng (Burkill) F. H. Chen	12306049	(+)-alpha-Muurolene	CYP19A1
Panax notoginseng (Burkill) F. H. Chen	7410	Acetophenone	GSK3B
Panax notoginseng (Burkill) F. H. Chen	7410	Acetophenone	METAP1
Panax notoginseng (Burkill) F. H. Chen	7410	Acetophenone	CHRM4
Panax notoginseng (Burkill) F. H. Chen	7410	Acetophenone	CHRNA4
Panax notoginseng (Burkill) F. H. Chen	7410	Acetophenone	CHRNB2
Panax notoginseng (Burkill) F. H. Chen	7410	Acetophenone	CHRM5
Panax notoginseng (Burkill) F. H. Chen	7410	Acetophenone	CHRM2
Panax notoginseng (Burkill) F. H. Chen	7410	Acetophenone	CHRM1
Panax notoginseng (Burkill) F. H. Chen	7410	Acetophenone	CHRM3
Panax notoginseng (Burkill) F. H. Chen	7410	Acetophenone	CHRNA7
Panax notoginseng (Burkill) F. H. Chen	7410	Acetophenone	ACHE
Panax notoginseng (Burkill) F. H. Chen	13246	Cyclododecanone	CA2
Panax notoginseng (Burkill) F. H. Chen	13246	Cyclododecanone	CA1
Panax notoginseng (Burkill) F. H. Chen	13246	Cyclododecanone	CES1
Panax notoginseng (Burkill) F. H. Chen	13246	Cyclododecanone	CES2
Panax notoginseng (Burkill) F. H. Chen	13246	Cyclododecanone	CYP19A1
Panax notoginseng (Burkill) F. H. Chen	13246	Cyclododecanone	CA4
Panax notoginseng (Burkill) F. H. Chen	13246	Cyclododecanone	NR1I3
Panax notoginseng (Burkill) F. H. Chen	13246	Cyclododecanone	AR
Panax notoginseng (Burkill) F. H. Chen	13246	Cyclododecanone	ADH1A
Panax notoginseng (Burkill) F. H. Chen	13246	Cyclododecanone	PARP1
Panax notoginseng (Burkill) F. H. Chen	13246	Cyclododecanone	MTNR1A
Panax notoginseng (Burkill) F. H. Chen	13246	Cyclododecanone	MTNR1B
Panax notoginseng (Burkill) F. H. Chen	13246	Cyclododecanone	TYMS
Panax notoginseng (Burkill) F. H. Chen	13246	Cyclododecanone	SRD5A1
Panax notoginseng (Burkill) F. H. Chen	13246	Cyclododecanone	ADH1C
Panax notoginseng (Burkill) F. H. Chen	13246	Cyclododecanone	SRD5A2
Panax notoginseng (Burkill) F. H. Chen	13246	Cyclododecanone	GLI2
Panax notoginseng (Burkill) F. H. Chen	13246	Cyclododecanone	GLI1
Panax notoginseng (Burkill) F. H. Chen	13246	Cyclododecanone	EPHX1
Panax notoginseng (Burkill) F. H. Chen	13246	Cyclododecanone	CTSK
Panax notoginseng (Burkill) F. H. Chen	13246	Cyclododecanone	SLC6A3
Panax notoginseng (Burkill) F. H. Chen	13246	Cyclododecanone	PAOX
Panax notoginseng (Burkill) F. H. Chen	13246	Cyclododecanone	CTSL
Panax notoginseng (Burkill) F. H. Chen	13246	Cyclododecanone	CTSB
Panax notoginseng (Burkill) F. H. Chen	13246	Cyclododecanone	IDO1
Panax notoginseng (Burkill) F. H. Chen	13246	Cyclododecanone	CHRM1
Panax notoginseng (Burkill) F. H. Chen	12308843	(-)-Cyperene	PPARA
Panax notoginseng (Burkill) F. H. Chen	12308843	(-)-Cyperene	CNR2
Panax notoginseng (Burkill) F. H. Chen	12308843	(-)-Cyperene	NR1I3
Panax notoginseng (Burkill) F. H. Chen	12308843	(-)-Cyperene	AR
Panax notoginseng (Burkill) F. H. Chen	12308843	(-)-Cyperene	CYP19A1
Panax notoginseng (Burkill) F. H. Chen	12308843	(-)-Cyperene	ESR1
Panax notoginseng (Burkill) F. H. Chen	12308843	(-)-Cyperene	CHRM2
Panax notoginseng (Burkill) F. H. Chen	12308843	(-)-Cyperene	SLC6A2
Panax notoginseng (Burkill) F. H. Chen	12308843	(-)-Cyperene	SLC6A4
Panax notoginseng (Burkill) F. H. Chen	12308843	(-)-Cyperene	CYP2C19
Panax notoginseng (Burkill) F. H. Chen	12308843	(-)-Cyperene	UGT2B7
Panax notoginseng (Burkill) F. H. Chen	12308843	(-)-Cyperene	BCHE
Panax notoginseng (Burkill) F. H. Chen	12053	2-Phenyl-2-propanol	CA2
Panax notoginseng (Burkill) F. H. Chen	12053	2-Phenyl-3-propanol	CA4
Panax notoginseng (Burkill) F. H. Chen	12053	2-Phenyl-4-propanol	CYP11B1
Panax notoginseng (Burkill) F. H. Chen	12053	2-Phenyl-5-propanol	CYP11B2
Panax notoginseng (Burkill) F. H. Chen	121712	Di-tert-butyl phthalate	ACHE
Panax notoginseng (Burkill) F. H. Chen	121712	Di-tert-butyl phthalate	ADRA2C
Panax notoginseng (Burkill) F. H. Chen	121712	Di-tert-butyl phthalate	PSMB1
Panax notoginseng (Burkill) F. H. Chen	121712	Di-tert-butyl phthalate	FKBP1A
Panax notoginseng (Burkill) F. H. Chen	121712	Di-tert-butyl phthalate	F2
Panax notoginseng (Burkill) F. H. Chen	121712	Di-tert-butyl phthalate	PLAU
Panax notoginseng (Burkill) F. H. Chen	121712	Di-tert-butyl phthalate	CTRB1
Panax notoginseng (Burkill) F. H. Chen	121712	Di-tert-butyl phthalate	TBXAS1
Panax notoginseng (Burkill) F. H. Chen	121712	Di-tert-butyl phthalate	DRD1
Panax notoginseng (Burkill) F. H. Chen	121712	Di-tert-butyl phthalate	TACR2
Panax notoginseng (Burkill) F. H. Chen	121712	Di-tert-butyl phthalate	DRD3
Panax notoginseng (Burkill) F. H. Chen	121712	Di-tert-butyl phthalate	OPRD1
Panax notoginseng (Burkill) F. H. Chen	121712	Di-tert-butyl phthalate	ADRB3
Panax notoginseng (Burkill) F. H. Chen	121712	Di-tert-butyl phthalate	ADORA3
Panax notoginseng (Burkill) F. H. Chen	121712	Di-tert-butyl phthalate	CYP2C9
Panax notoginseng (Burkill) F. H. Chen	121712	Di-tert-butyl phthalate	CYP3A4
Panax notoginseng (Burkill) F. H. Chen	121712	Di-tert-butyl phthalate	CYP2C19
Panax notoginseng (Burkill) F. H. Chen	121712	Di-tert-butyl phthalate	MIF
Panax notoginseng (Burkill) F. H. Chen	121712	Di-tert-butyl phthalate	CYP11B1
Panax notoginseng (Burkill) F. H. Chen	121712	Di-tert-butyl phthalate	GABRA2
Panax notoginseng (Burkill) F. H. Chen	121712	Di-tert-butyl phthalate	GABRG2
Panax notoginseng (Burkill) F. H. Chen	121712	Di-tert-butyl phthalate	GABRB2
Panax notoginseng (Burkill) F. H. Chen	121712	Di-tert-butyl phthalate	CYP11B2
Panax notoginseng (Burkill) F. H. Chen	121712	Di-tert-butyl phthalate	GALR3
Panax notoginseng (Burkill) F. H. Chen	121712	Di-tert-butyl phthalate	PABPC1
Panax notoginseng (Burkill) F. H. Chen	121712	Di-tert-butyl phthalate	PREP
Panax notoginseng (Burkill) F. H. Chen	121712	Di-tert-butyl phthalate	GABRB3
Panax notoginseng (Burkill) F. H. Chen	121712	Di-tert-butyl phthalate	GABRA3
Panax notoginseng (Burkill) F. H. Chen	121712	Di-tert-butyl phthalate	GABRA1
Panax notoginseng (Burkill) F. H. Chen	121712	Di-tert-butyl phthalate	GABRA5
Panax notoginseng (Burkill) F. H. Chen	121712	Di-tert-butyl phthalate	GRM5
Panax notoginseng (Burkill) F. H. Chen	121712	Di-tert-butyl phthalate	TRPA1
Panax notoginseng (Burkill) F. H. Chen	121712	Di-tert-butyl phthalate	TNKS2
Panax notoginseng (Burkill) F. H. Chen	121712	Di-tert-butyl phthalate	ADORA1
Panax notoginseng (Burkill) F. H. Chen	121712	Di-tert-butyl phthalate	ADORA2A
Panax notoginseng (Burkill) F. H. Chen	121712	Di-tert-butyl phthalate	PDE10A
Panax notoginseng (Burkill) F. H. Chen	121712	Di-tert-butyl phthalate	CXCR2
Panax notoginseng (Burkill) F. H. Chen	121712	Di-tert-butyl phthalate	CNR2
Panax notoginseng (Burkill) F. H. Chen	121712	Di-tert-butyl phthalate	MEN1
Panax notoginseng (Burkill) F. H. Chen	121712	Di-tert-butyl phthalate	RGS4
Panax notoginseng (Burkill) F. H. Chen	121712	Di-tert-butyl phthalate	CTSG
Panax notoginseng (Burkill) F. H. Chen	121712	Di-tert-butyl phthalate	TSPO
Panax notoginseng (Burkill) F. H. Chen	121712	Di-tert-butyl phthalate	BCHE
Panax notoginseng (Burkill) F. H. Chen	121712	Di-tert-butyl phthalate	EPHX1
Panax notoginseng (Burkill) F. H. Chen	121712	Di-tert-butyl phthalate	PIM1
Panax notoginseng (Burkill) F. H. Chen	121712	Di-tert-butyl phthalate	PTGS2
Panax notoginseng (Burkill) F. H. Chen	121712	Di-tert-butyl phthalate	METAP1
Panax notoginseng (Burkill) F. H. Chen	121712	Di-tert-butyl phthalate	CACNA1C
Panax notoginseng (Burkill) F. H. Chen	121712	Di-tert-butyl phthalate	CTSK
Panax notoginseng (Burkill) F. H. Chen	121712	Di-tert-butyl phthalate	CTSL
Panax notoginseng (Burkill) F. H. Chen	121712	Di-tert-butyl phthalate	CTSB
Panax notoginseng (Burkill) F. H. Chen	121712	Di-tert-butyl phthalate	GPR55
Panax notoginseng (Burkill) F. H. Chen	121712	Di-tert-butyl phthalate	PIK3CD
Panax notoginseng (Burkill) F. H. Chen	121712	Di-tert-butyl phthalate	PIK3R1
Panax notoginseng (Burkill) F. H. Chen	121712	Di-tert-butyl phthalate	ABCB1
Panax notoginseng (Burkill) F. H. Chen	121712	Di-tert-butyl phthalate	HSD17B3
Panax notoginseng (Burkill) F. H. Chen	121712	Di-tert-butyl phthalate	CES1
Panax notoginseng (Burkill) F. H. Chen	121712	Di-tert-butyl phthalate	PDE5A
Panax notoginseng (Burkill) F. H. Chen	121712	Di-tert-butyl phthalate	CTSC
Panax notoginseng (Burkill) F. H. Chen	121712	Di-tert-butyl phthalate	PDE3A
Panax notoginseng (Burkill) F. H. Chen	121712	Di-tert-butyl phthalate	PDE4A
Panax notoginseng (Burkill) F. H. Chen	121712	Di-tert-butyl phthalate	PDE2A
Panax notoginseng (Burkill) F. H. Chen	121712	Di-tert-butyl phthalate	PDE11A
Panax notoginseng (Burkill) F. H. Chen	121712	Di-tert-butyl phthalate	CTSS
Panax notoginseng (Burkill) F. H. Chen	121712	Di-tert-butyl phthalate	PDE7A
Panax notoginseng (Burkill) F. H. Chen	121712	Di-tert-butyl phthalate	CTSV
Panax notoginseng (Burkill) F. H. Chen	121712	Di-tert-butyl phthalate	PLA2G2A
Panax notoginseng (Burkill) F. H. Chen	121712	Di-tert-butyl phthalate	PDE7B
Panax notoginseng (Burkill) F. H. Chen	5317045	3-Nonen-2-one	SRD5A1
Panax notoginseng (Burkill) F. H. Chen	5317045	3-Nonen-2-one	SRD5A2
Panax notoginseng (Burkill) F. H. Chen	5317045	3-Nonen-2-one	GSR
Panax notoginseng (Burkill) F. H. Chen	5317045	3-Nonen-2-one	PGR
Panax notoginseng (Burkill) F. H. Chen	5317045	3-Nonen-2-one	CYP19A1
Panax notoginseng (Burkill) F. H. Chen	5317045	3-Nonen-2-one	PTPN2
Panax notoginseng (Burkill) F. H. Chen	5317045	3-Nonen-2-one	FABP1
Panax notoginseng (Burkill) F. H. Chen	5317045	3-Nonen-2-one	DRD2
Panax notoginseng (Burkill) F. H. Chen	5317045	3-Nonen-2-one	SIGMAR1
Panax notoginseng (Burkill) F. H. Chen	5317045	3-Nonen-2-one	DRD4
Panax notoginseng (Burkill) F. H. Chen	5317045	3-Nonen-2-one	ADH1A
Panax notoginseng (Burkill) F. H. Chen	5317045	3-Nonen-2-one	AR
Panax notoginseng (Burkill) F. H. Chen	5317045	3-Nonen-2-one	ADH1C
Panax notoginseng (Burkill) F. H. Chen	5317045	3-Nonen-2-one	MAOB
Panax notoginseng (Burkill) F. H. Chen	5317045	3-Nonen-2-one	ADH1B
Panax notoginseng (Burkill) F. H. Chen	5317045	3-Nonen-2-one	ADH7
Panax notoginseng (Burkill) F. H. Chen	5317045	3-Nonen-2-one	KAT2B
Panax notoginseng (Burkill) F. H. Chen	5317045	3-Nonen-2-one	TRPA1
Panax notoginseng (Burkill) F. H. Chen	5317045	3-Nonen-2-one	CDC25B
Panax notoginseng (Burkill) F. H. Chen	5317045	3-Nonen-2-one	CHRNA4
Panax notoginseng (Burkill) F. H. Chen	5317045	3-Nonen-2-one	CHRNB2
Panax notoginseng (Burkill) F. H. Chen	5317045	3-Nonen-2-one	SIRT2
Panax notoginseng (Burkill) F. H. Chen	5317045	3-Nonen-2-one	CYP17A1
Panax notoginseng (Burkill) F. H. Chen	5317045	3-Nonen-2-one	AHR
Panax notoginseng (Burkill) F. H. Chen	5317045	3-Nonen-2-one	MAOA
Panax notoginseng (Burkill) F. H. Chen	5317045	3-Nonen-2-one	MPO
Panax notoginseng (Burkill) F. H. Chen	5317045	3-Nonen-2-one	GLI2
Panax notoginseng (Burkill) F. H. Chen	5317045	3-Nonen-2-one	GLI1
Panax notoginseng (Burkill) F. H. Chen	5317045	3-Nonen-2-one	MTNR1A
Panax notoginseng (Burkill) F. H. Chen	5317045	3-Nonen-2-one	GSK3B
Panax notoginseng (Burkill) F. H. Chen	5317045	3-Nonen-2-one	CHRM1
Panax notoginseng (Burkill) F. H. Chen	5317045	3-Nonen-2-one	CHRM3
Panax notoginseng (Burkill) F. H. Chen	5317045	3-Nonen-2-one	PDE7A
Panax notoginseng (Burkill) F. H. Chen	5317045	3-Nonen-2-one	PSMB5
Panax ginseng C. A. Meyer	15560276	alpha-Gurjunene	PPARA
Panax ginseng C. A. Meyer	15560276	alpha-Gurjunene	CNR2
Panax ginseng C. A. Meyer	15560276	alpha-Gurjunene	NR1I3
Panax ginseng C. A. Meyer	15560276	alpha-Gurjunene	FAAH
Panax ginseng C. A. Meyer	15560276	alpha-Gurjunene	TRPV1
Panax ginseng C. A. Meyer	6432312	gamma-Elemene	PPARA
Panax ginseng C. A. Meyer	6432312	gamma-Elemene	CNR2
Panax ginseng C. A. Meyer	6432312	gamma-Elemene	NR1H3
Panax ginseng C. A. Meyer	6432312	gamma-Elemene	CXCR3
Panax ginseng C. A. Meyer	5281515	beta-Caryophyllene	PPARA
Panax ginseng C. A. Meyer	5281515	beta-Caryophyllene	CNR2
Panax ginseng C. A. Meyer	5281515	beta-Caryophyllene	FAAH
Panax ginseng C. A. Meyer	5281515	beta-Caryophyllene	TRPV1
Panax ginseng C. A. Meyer	5280863	Kaempferol	NOX4
Panax ginseng C. A. Meyer	5280863	Kaempferol	AKR1B1
Panax ginseng C. A. Meyer	5280863	Kaempferol	XDH
Panax ginseng C. A. Meyer	5280863	Kaempferol	TYR
Panax ginseng C. A. Meyer	5280863	Kaempferol	FLT3
Panax ginseng C. A. Meyer	5280863	Kaempferol	CA2
Panax ginseng C. A. Meyer	5280863	Kaempferol	ALOX5
Panax ginseng C. A. Meyer	5280863	Kaempferol	CA7
Panax ginseng C. A. Meyer	5280863	Kaempferol	HSD17B2
Panax ginseng C. A. Meyer	5280863	Kaempferol	ABCC1
Panax ginseng C. A. Meyer	5280863	Kaempferol	HSD17B1
Panax ginseng C. A. Meyer	5280863	Kaempferol	AHR
Panax ginseng C. A. Meyer	5280863	Kaempferol	CA12
Panax ginseng C. A. Meyer	5280863	Kaempferol	ESRRA
Panax ginseng C. A. Meyer	5280863	Kaempferol	ABCB1
Panax ginseng C. A. Meyer	5280863	Kaempferol	CYP1B1
Panax ginseng C. A. Meyer	5280863	Kaempferol	ABCG2
Panax ginseng C. A. Meyer	5280863	Kaempferol	ADORA1
Panax ginseng C. A. Meyer	5280863	Kaempferol	CA4
Panax ginseng C. A. Meyer	5280863	Kaempferol	ACHE
Panax ginseng C. A. Meyer	5280863	Kaempferol	MAOA
Panax ginseng C. A. Meyer	5280863	Kaempferol	GLO1
Panax ginseng C. A. Meyer	5280863	Kaempferol	SYK
Panax ginseng C. A. Meyer	5280863	Kaempferol	GSK3B
Panax ginseng C. A. Meyer	5280863	Kaempferol	MMP9
Panax ginseng C. A. Meyer	5280863	Kaempferol	MMP2
Panax ginseng C. A. Meyer	5280863	Kaempferol	ALOX15
Panax ginseng C. A. Meyer	5280863	Kaempferol	ALOX12
Panax ginseng C. A. Meyer	5280863	Kaempferol	PTPRS
Panax ginseng C. A. Meyer	5280863	Kaempferol	ADORA2A
Panax ginseng C. A. Meyer	5280863	Kaempferol	CDK5R1
Panax ginseng C. A. Meyer	5280863	Kaempferol	CCNB3
Panax ginseng C. A. Meyer	5280863	Kaempferol	CDK5
Panax ginseng C. A. Meyer	5280863	Kaempferol	CDK1
Panax ginseng C. A. Meyer	5280863	Kaempferol	CCNB1
Panax ginseng C. A. Meyer	5280863	Kaempferol	CCNB2
Panax ginseng C. A. Meyer	5280863	Kaempferol	ARG1
Panax ginseng C. A. Meyer	5280863	Kaempferol	GPR35
Panax ginseng C. A. Meyer	5280863	Kaempferol	ESR2
Panax ginseng C. A. Meyer	5280863	Kaempferol	DAPK1
Panax ginseng C. A. Meyer	5280863	Kaempferol	MPG
Panax ginseng C. A. Meyer	5280863	Kaempferol	SLC22A12
Panax ginseng C. A. Meyer	5280863	Kaempferol	TTR
Panax ginseng C. A. Meyer	5280863	Kaempferol	AKR1B10
Panax ginseng C. A. Meyer	5280863	Kaempferol	TNKS2
Panax ginseng C. A. Meyer	5280863	Kaempferol	TNKS
Panax ginseng C. A. Meyer	5280863	Kaempferol	CDK6
Panax ginseng C. A. Meyer	5280863	Kaempferol	CDK2
Panax ginseng C. A. Meyer	5280863	Kaempferol	CYP19A1
Panax ginseng C. A. Meyer	5280863	Kaempferol	CSNK2A1
Panax ginseng C. A. Meyer	5280863	Kaempferol	EGFR
Panax ginseng C. A. Meyer	5280863	Kaempferol	AVPR2
Panax ginseng C. A. Meyer	5280863	Kaempferol	IGF1R
Panax ginseng C. A. Meyer	5280863	Kaempferol	F2
Panax ginseng C. A. Meyer	5280863	Kaempferol	PIM1
Panax ginseng C. A. Meyer	5280863	Kaempferol	AURKB
Panax ginseng C. A. Meyer	5280863	Kaempferol	DRD4
Panax ginseng C. A. Meyer	5280863	Kaempferol	MPO
Panax ginseng C. A. Meyer	5280863	Kaempferol	PIK3R1
Panax ginseng C. A. Meyer	5280863	Kaempferol	PYGL
Panax ginseng C. A. Meyer	5280863	Kaempferol	CA1
Panax ginseng C. A. Meyer	5280863	Kaempferol	SRC
Panax ginseng C. A. Meyer	5280863	Kaempferol	PTK2
Panax ginseng C. A. Meyer	5280863	Kaempferol	KDR
Panax ginseng C. A. Meyer	5280863	Kaempferol	MMP13
Panax ginseng C. A. Meyer	5280863	Kaempferol	MMP3
Panax ginseng C. A. Meyer	5280863	Kaempferol	CA3
Panax ginseng C. A. Meyer	5280863	Kaempferol	PLK1
Panax ginseng C. A. Meyer	5280863	Kaempferol	CA6
Panax ginseng C. A. Meyer	5280863	Kaempferol	PKN1
Panax ginseng C. A. Meyer	5280863	Kaempferol	CA14
Panax ginseng C. A. Meyer	5280863	Kaempferol	CA9
Panax ginseng C. A. Meyer	5280863	Kaempferol	MET
Panax ginseng C. A. Meyer	5280863	Kaempferol	NEK2
Panax ginseng C. A. Meyer	5280863	Kaempferol	CXCR1
Panax ginseng C. A. Meyer	5280863	Kaempferol	CAMK2B
Panax ginseng C. A. Meyer	5280863	Kaempferol	ALK
Panax ginseng C. A. Meyer	5280863	Kaempferol	AKT1
Panax ginseng C. A. Meyer	5280863	Kaempferol	NEK6
Panax ginseng C. A. Meyer	5280863	Kaempferol	PLA2G1B
Panax ginseng C. A. Meyer	5280863	Kaempferol	CA5A
Panax ginseng C. A. Meyer	5280863	Kaempferol	BACE1
Panax ginseng C. A. Meyer	5280863	Kaempferol	AXL
Panax ginseng C. A. Meyer	5280863	Kaempferol	NUAK1
Panax ginseng C. A. Meyer	5280863	Kaempferol	AKR1C2
Panax ginseng C. A. Meyer	5280863	Kaempferol	AKR1C1
Panax ginseng C. A. Meyer	5280863	Kaempferol	AKR1C3
Panax ginseng C. A. Meyer	5280863	Kaempferol	AKR1C4
Panax ginseng C. A. Meyer	5280863	Kaempferol	CA13
Panax ginseng C. A. Meyer	5280863	Kaempferol	AKR1A1
Panax ginseng C. A. Meyer	5280863	Kaempferol	APP
Panax ginseng C. A. Meyer	5280863	Kaempferol	PARP1
Panax ginseng C. A. Meyer	5280863	Kaempferol	MMP12
Panax ginseng C. A. Meyer	5280863	Kaempferol	CD38
Panax ginseng C. A. Meyer	5280863	Kaempferol	TOP1
Panax ginseng C. A. Meyer	5280863	Kaempferol	ESR1
Panax ginseng C. A. Meyer	5280863	Kaempferol	PTGS2
Panax ginseng C. A. Meyer	5280863	Kaempferol	CFTR
Panax ginseng C. A. Meyer	5280863	Kaempferol	PFKFB3
Panax ginseng C. A. Meyer	5280863	Kaempferol	AMY1A
Panax ginseng C. A. Meyer	5280863	Kaempferol	GRK6
Panax ginseng C. A. Meyer	5280863	Kaempferol	TERT
Panax ginseng C. A. Meyer	5280863	Kaempferol	MAPT
Panax ginseng C. A. Meyer	65575	Cedrol	UGT2B7
Panax ginseng C. A. Meyer	65575	Cedrol	CDC25A
Panax ginseng C. A. Meyer	65575	Cedrol	CDC25B
Panax ginseng C. A. Meyer	65575	Cedrol	NR1I3
Panax ginseng C. A. Meyer	65575	Cedrol	AR
Panax ginseng C. A. Meyer	65575	Cedrol	SHBG
Panax ginseng C. A. Meyer	65575	Cedrol	HSD11B1
Panax ginseng C. A. Meyer	65575	Cedrol	POLA1
Panax ginseng C. A. Meyer	65575	Cedrol	NR1H4
Panax ginseng C. A. Meyer	65575	Cedrol	SHH
Panax ginseng C. A. Meyer	65575	Cedrol	TRPM8
Panax ginseng C. A. Meyer	65575	Cedrol	ESR1
Panax ginseng C. A. Meyer	65575	Cedrol	ESR2
Panax ginseng C. A. Meyer	65575	Cedrol	CA2
Panax ginseng C. A. Meyer	65575	Cedrol	CA1
Panax ginseng C. A. Meyer	65575	Cedrol	CA4
Panax ginseng C. A. Meyer	65575	Cedrol	NPC1L1
Panax ginseng C. A. Meyer	65575	Cedrol	GPBAR1
Panax ginseng C. A. Meyer	65575	Cedrol	CYP19A1
Panax ginseng C. A. Meyer	65575	Cedrol	NR1H3
Panax ginseng C. A. Meyer	65575	Cedrol	IDO1
Panax ginseng C. A. Meyer	65575	Cedrol	G6PD
Panax ginseng C. A. Meyer	65575	Cedrol	GABBR1
Panax ginseng C. A. Meyer	338	Salicylic acid	CA2
Panax ginseng C. A. Meyer	338	Salicylic acid	CA1
Panax ginseng C. A. Meyer	338	Salicylic acid	CA12
Panax ginseng C. A. Meyer	338	Salicylic acid	CA9
Panax ginseng C. A. Meyer	338	Salicylic acid	CA7
Panax ginseng C. A. Meyer	338	Salicylic acid	CA14
Panax ginseng C. A. Meyer	338	Salicylic acid	CA6
Panax ginseng C. A. Meyer	338	Salicylic acid	CA3
Panax ginseng C. A. Meyer	338	Salicylic acid	CA4
Panax ginseng C. A. Meyer	338	Salicylic acid	CA5B
Panax ginseng C. A. Meyer	338	Salicylic acid	CA5A
Panax ginseng C. A. Meyer	338	Salicylic acid	CA13
Panax ginseng C. A. Meyer	338	Salicylic acid	LDHA
Panax ginseng C. A. Meyer	338	Salicylic acid	LDHB
Panax ginseng C. A. Meyer	338	Salicylic acid	ERN1
Panax ginseng C. A. Meyer	338	Salicylic acid	AKR1C2
Panax ginseng C. A. Meyer	338	Salicylic acid	AKR1C1
Panax ginseng C. A. Meyer	338	Salicylic acid	HDAC6
Panax ginseng C. A. Meyer	338	Salicylic acid	HDAC8
Panax ginseng C. A. Meyer	338	Salicylic acid	DPP4
Panax ginseng C. A. Meyer	338	Salicylic acid	FUT7
Panax ginseng C. A. Meyer	338	Salicylic acid	DAO
Panax ginseng C. A. Meyer	338	Salicylic acid	ESR2
Panax ginseng C. A. Meyer	338	Salicylic acid	ALB
Panax ginseng C. A. Meyer	338	Salicylic acid	MCL1
Panax ginseng C. A. Meyer	1110	Succinic Acid	EGLN1
Panax ginseng C. A. Meyer	1110	Succinic Acid	HDAC3
Panax ginseng C. A. Meyer	60961	Adenosine	ADORA1
Panax ginseng C. A. Meyer	60961	Adenosine	ADORA2A
Panax ginseng C. A. Meyer	60961	Adenosine	ADORA3
Panax ginseng C. A. Meyer	60961	Adenosine	DPP4
Panax ginseng C. A. Meyer	60961	Adenosine	ADK
Panax ginseng C. A. Meyer	60961	Adenosine	HSPA8
Panax ginseng C. A. Meyer	60961	Adenosine	HSPA5
Panax ginseng C. A. Meyer	60961	Adenosine	ADA
Panax ginseng C. A. Meyer	60961	Adenosine	AHCY
Panax ginseng C. A. Meyer	60961	Adenosine	GAPDH
Panax ginseng C. A. Meyer	60961	Adenosine	EHMT1
Panax ginseng C. A. Meyer	60961	Adenosine	EHMT2
Panax ginseng C. A. Meyer	60961	Adenosine	MCL1
Panax ginseng C. A. Meyer	60961	Adenosine	SETD7
Panax ginseng C. A. Meyer	60961	Adenosine	AMD1
Panax ginseng C. A. Meyer	60961	Adenosine	EGFR
Panax ginseng C. A. Meyer	60961	Adenosine	SRM
Panax ginseng C. A. Meyer	60961	Adenosine	PDCD4
Panax ginseng C. A. Meyer	60961	Adenosine	SRC
Panax ginseng C. A. Meyer	60961	Adenosine	ADORA2B
Panax ginseng C. A. Meyer	60961	Adenosine	MAPK1
Panax ginseng C. A. Meyer	60961	Adenosine	SLC29A1
Panax ginseng C. A. Meyer	60961	Adenosine	PNP
Panax ginseng C. A. Meyer	60961	Adenosine	SETD2
Panax ginseng C. A. Meyer	60961	Adenosine	CARM1
Panax ginseng C. A. Meyer	60961	Adenosine	PRMT1
Panax ginseng C. A. Meyer	60961	Adenosine	DOT1L
Panax ginseng C. A. Meyer	60961	Adenosine	GRK1
Panax ginseng C. A. Meyer	60961	Adenosine	P2RY1
Panax ginseng C. A. Meyer	60961	Adenosine	P2RY11
Panax ginseng C. A. Meyer	60961	Adenosine	MTAP
Panax ginseng C. A. Meyer	60961	Adenosine	ROCK2
Panax ginseng C. A. Meyer	60961	Adenosine	PRKACA
Panax ginseng C. A. Meyer	60961	Adenosine	SMS
Panax ginseng C. A. Meyer	60961	Adenosine	FBP1
Panax ginseng C. A. Meyer	60961	Adenosine	FHIT
Panax ginseng C. A. Meyer	60961	Adenosine	CDA
Panax ginseng C. A. Meyer	60961	Adenosine	KMT2A
Panax ginseng C. A. Meyer	60961	Adenosine	SUV39H1
Panax ginseng C. A. Meyer	60961	Adenosine	DNMT1
Panax ginseng C. A. Meyer	60961	Adenosine	INMT
Panax ginseng C. A. Meyer	60961	Adenosine	SMYD2
Panax ginseng C. A. Meyer	60961	Adenosine	EZH2
Panax ginseng C. A. Meyer	60961	Adenosine	EZH1
Panax ginseng C. A. Meyer	60961	Adenosine	SETDB1
Panax ginseng C. A. Meyer	60961	Adenosine	PNMT
Panax ginseng C. A. Meyer	60961	Adenosine	DNMT3B
Panax ginseng C. A. Meyer	60961	Adenosine	MAPKAPK2
Panax ginseng C. A. Meyer	60961	Adenosine	HSPA1A
Panax ginseng C. A. Meyer	60961	Adenosine	RARS
Panax ginseng C. A. Meyer	60961	Adenosine	CA2
Panax ginseng C. A. Meyer	60961	Adenosine	CA1
Panax ginseng C. A. Meyer	60961	Adenosine	CA12
Panax ginseng C. A. Meyer	60961	Adenosine	CA9
Panax ginseng C. A. Meyer	60961	Adenosine	OGA
Panax ginseng C. A. Meyer	60961	Adenosine	CCND1
Panax ginseng C. A. Meyer	60961	Adenosine	CDK4
Panax ginseng C. A. Meyer	60961	Adenosine	CA14
Panax ginseng C. A. Meyer	60961	Adenosine	FUCA1
Panax ginseng C. A. Meyer	60961	Adenosine	HSD17B1
Panax ginseng C. A. Meyer	60961	Adenosine	PIM1
Panax ginseng C. A. Meyer	60961	Adenosine	GBA
Panax ginseng C. A. Meyer	60961	Adenosine	GAA
Panax ginseng C. A. Meyer	60961	Adenosine	MARS
Panax ginseng C. A. Meyer	60961	Adenosine	GSK3B
Panax ginseng C. A. Meyer	60961	Adenosine	PRMT7
Panax ginseng C. A. Meyer	60961	Adenosine	PARG
Panax ginseng C. A. Meyer	60961	Adenosine	IDO1
Panax ginseng C. A. Meyer	60961	Adenosine	SLC28A2
Panax ginseng C. A. Meyer	60961	Adenosine	IARS
Panax ginseng C. A. Meyer	60961	Adenosine	DAO
Panax ginseng C. A. Meyer	60961	Adenosine	F2
Panax ginseng C. A. Meyer	5317844	alpha-Guaiene	PPARA
Panax ginseng C. A. Meyer	5317844	alpha-Guaiene	CNR2
Panax ginseng C. A. Meyer	5317844	alpha-Guaiene	CXCR3
Panax ginseng C. A. Meyer	5317844	alpha-Guaiene	NR1I3
Panax ginseng C. A. Meyer	101596917	beta-Maaliene	PPARA
Panax ginseng C. A. Meyer	101596917	beta-Maaliene	CNR2
Panax ginseng C. A. Meyer	101596917	beta-Maaliene	BCHE
Panax ginseng C. A. Meyer	101596917	beta-Maaliene	AR
Panax ginseng C. A. Meyer	101596917	beta-Maaliene	CYP19A1
Panax ginseng C. A. Meyer	101596917	beta-Maaliene	ESR1
Panax ginseng C. A. Meyer	101596917	beta-Maaliene	CHRM2
Panax ginseng C. A. Meyer	101596917	beta-Maaliene	SLC6A2
Panax ginseng C. A. Meyer	101596917	beta-Maaliene	SLC6A4
Panax ginseng C. A. Meyer	101596917	beta-Maaliene	CYP2C19
Panax ginseng C. A. Meyer	101596917	beta-Maaliene	PTPN1
Panax ginseng C. A. Meyer	101596917	beta-Maaliene	NR1I3
Panax ginseng C. A. Meyer	14211700	Qacsyxcuewlgne-morslucnsa-	KIT
Panax ginseng C. A. Meyer	14211700	Qacsyxcuewlgne-morslucnsa-	SRC
Panax ginseng C. A. Meyer	14211700	Qacsyxcuewlgne-morslucnsa-	KDR
Panax ginseng C. A. Meyer	14211700	Qacsyxcuewlgne-morslucnsa-	FGFR1
Panax ginseng C. A. Meyer	14211700	Qacsyxcuewlgne-morslucnsa-	MET
Panax ginseng C. A. Meyer	14211700	Qacsyxcuewlgne-morslucnsa-	MMP9
Panax ginseng C. A. Meyer	14211700	Qacsyxcuewlgne-morslucnsa-	CA3
Panax ginseng C. A. Meyer	14211700	Qacsyxcuewlgne-morslucnsa-	CA5B
Panax ginseng C. A. Meyer	14211700	Qacsyxcuewlgne-morslucnsa-	PYGL
Panax ginseng C. A. Meyer	14211700	Qacsyxcuewlgne-morslucnsa-	ALOX15
Panax ginseng C. A. Meyer	14211700	Qacsyxcuewlgne-morslucnsa-	MMP1
Panax ginseng C. A. Meyer	14211700	Qacsyxcuewlgne-morslucnsa-	ADAM17
Panax ginseng C. A. Meyer	14211700	Qacsyxcuewlgne-morslucnsa-	MMP7
Panax ginseng C. A. Meyer	14211700	Qacsyxcuewlgne-morslucnsa-	MMP8
Panax ginseng C. A. Meyer	14211700	Qacsyxcuewlgne-morslucnsa-	MT-ND4
Panax ginseng C. A. Meyer	938	Nicotinic acid	HCAR2
Panax ginseng C. A. Meyer	938	Nicotinic acid	DDO
Panax ginseng C. A. Meyer	938	Nicotinic acid	SIRT3
Panax ginseng C. A. Meyer	938	Nicotinic acid	SIRT2
Panax ginseng C. A. Meyer	938	Nicotinic acid	SLC22A6
Panax ginseng C. A. Meyer	938	Nicotinic acid	FYN
Panax ginseng C. A. Meyer	938	Nicotinic acid	LCK
Panax ginseng C. A. Meyer	1130	Thiamine	TKT
Panax ginseng C. A. Meyer	1130	Thiamine	HPGD
Panax ginseng C. A. Meyer	1130	Thiamine	CA2
Panax ginseng C. A. Meyer	1130	Thiamine	CA1
Panax ginseng C. A. Meyer	1130	Thiamine	HCAR2
Panax ginseng C. A. Meyer	1130	Thiamine	AKR1C3
Panax ginseng C. A. Meyer	1130	Thiamine	NR1H4
Panax ginseng C. A. Meyer	1130	Thiamine	ADAMTS5
Panax ginseng C. A. Meyer	1130	Thiamine	MMP1
Panax ginseng C. A. Meyer	1130	Thiamine	MMP14
Panax ginseng C. A. Meyer	1130	Thiamine	CYP26B1
Panax ginseng C. A. Meyer	1130	Thiamine	MDM2
Panax ginseng C. A. Meyer	1130	Thiamine	CYP26A1
Panax ginseng C. A. Meyer	1130	Thiamine	PPARG
Panax ginseng C. A. Meyer	1130	Thiamine	PPARA
Panax ginseng C. A. Meyer	1130	Thiamine	PPARD
Panax ginseng C. A. Meyer	1130	Thiamine	CSF1R
Panax ginseng C. A. Meyer	1130	Thiamine	METAP2
Panax ginseng C. A. Meyer	1130	Thiamine	GPR35
Panax ginseng C. A. Meyer	1130	Thiamine	PTGER1
Panax ginseng C. A. Meyer	1130	Thiamine	RBP4
Panax ginseng C. A. Meyer	1130	Thiamine	GRM2
Panax ginseng C. A. Meyer	1130	Thiamine	GRM3
Panax ginseng C. A. Meyer	1130	Thiamine	GRIN1
Panax ginseng C. A. Meyer	1130	Thiamine	CHRM3
Panax ginseng C. A. Meyer	1130	Thiamine	MCL1
Panax ginseng C. A. Meyer	1130	Thiamine	CTSV
Panax ginseng C. A. Meyer	1130	Thiamine	CTSL
Panax ginseng C. A. Meyer	1130	Thiamine	BCL2
Panax ginseng C. A. Meyer	1130	Thiamine	KDM4C
Panax ginseng C. A. Meyer	12766	Cyclooctanol	CA2
Panax ginseng C. A. Meyer	12766	Cyclooctanol	CA1
Panax ginseng C. A. Meyer	12766	Cyclooctanol	CA4
Panax ginseng C. A. Meyer	12766	Cyclooctanol	TRPM8
Panax ginseng C. A. Meyer	12766	Cyclooctanol	ESR1
Panax ginseng C. A. Meyer	12766	Cyclooctanol	SHBG
Panax ginseng C. A. Meyer	12766	Cyclooctanol	CDC25A
Panax ginseng C. A. Meyer	12766	Cyclooctanol	CDC25B
Panax ginseng C. A. Meyer	12766	Cyclooctanol	NR1I3
Panax ginseng C. A. Meyer	12766	Cyclooctanol	AR
Panax ginseng C. A. Meyer	12766	Cyclooctanol	NR1H4
Panax ginseng C. A. Meyer	12766	Cyclooctanol	GPBAR1
Panax ginseng C. A. Meyer	12766	Cyclooctanol	SHH
Panax ginseng C. A. Meyer	12766	Cyclooctanol	ESR2
Panax ginseng C. A. Meyer	12766	Cyclooctanol	SIGMAR1
Panax ginseng C. A. Meyer	12766	Cyclooctanol	DRD2
Panax ginseng C. A. Meyer	12766	Cyclooctanol	UGT2B7
Panax ginseng C. A. Meyer	12766	Cyclooctanol	POLA1
Panax ginseng C. A. Meyer	12766	Cyclooctanol	NPC1L1
Panax ginseng C. A. Meyer	12766	Cyclooctanol	SLC6A3
Panax ginseng C. A. Meyer	15560278	CID 15560278	PPARA
Panax ginseng C. A. Meyer	15560278	CID 15560278	CNR2
Panax ginseng C. A. Meyer	15560278	CID 15560278	BCHE
Panax ginseng C. A. Meyer	15560278	CID 15560278	AR
Panax ginseng C. A. Meyer	15560278	CID 15560278	CYP19A1
Panax ginseng C. A. Meyer	15560278	CID 15560278	ESR1
Panax ginseng C. A. Meyer	15560278	CID 15560278	CHRM2
Panax ginseng C. A. Meyer	15560278	CID 15560278	SLC6A2
Panax ginseng C. A. Meyer	15560278	CID 15560278	SLC6A4
Panax ginseng C. A. Meyer	15560278	CID 15560278	CYP2C19
Panax ginseng C. A. Meyer	15560278	CID 15560278	PTPN1
Panax ginseng C. A. Meyer	15560278	CID 15560278	NR1I3
Panax ginseng C. A. Meyer	12313993	(1S,4R,7R)-1,4,9,9-Tetramethyl-1,2,3,4,5,6,7,8-octahydro-4,7-methanoazulene	PPARA
Panax ginseng C. A. Meyer	12313993	(1S,4R,7R)-1,4,9,9-Tetramethyl-1,2,3,4,5,6,7,8-octahydro-4,7-methanoazulene	CNR2
Panax ginseng C. A. Meyer	12313993	(1S,4R,7R)-1,4,9,9-Tetramethyl-1,2,3,4,5,6,7,8-octahydro-4,7-methanoazulene	AR
Panax ginseng C. A. Meyer	12313993	(1S,4R,7R)-1,4,9,9-Tetramethyl-1,2,3,4,5,6,7,8-octahydro-4,7-methanoazulene	CYP19A1
Panax ginseng C. A. Meyer	12313993	(1S,4R,7R)-1,4,9,9-Tetramethyl-1,2,3,4,5,6,7,8-octahydro-4,7-methanoazulene	ESR1
Panax ginseng C. A. Meyer	12313993	(1S,4R,7R)-1,4,9,9-Tetramethyl-1,2,3,4,5,6,7,8-octahydro-4,7-methanoazulene	CHRM2
Panax ginseng C. A. Meyer	12313993	(1S,4R,7R)-1,4,9,9-Tetramethyl-1,2,3,4,5,6,7,8-octahydro-4,7-methanoazulene	SLC6A2
Panax ginseng C. A. Meyer	12313993	(1S,4R,7R)-1,4,9,9-Tetramethyl-1,2,3,4,5,6,7,8-octahydro-4,7-methanoazulene	SLC6A4
Panax ginseng C. A. Meyer	12313993	(1S,4R,7R)-1,4,9,9-Tetramethyl-1,2,3,4,5,6,7,8-octahydro-4,7-methanoazulene	CYP2C19
Panax ginseng C. A. Meyer	12313993	(1S,4R,7R)-1,4,9,9-Tetramethyl-1,2,3,4,5,6,7,8-octahydro-4,7-methanoazulene	NR1I3
Panax ginseng C. A. Meyer	5316891	7-Hydroxy-2,5-dimethyl-4H-1-benzopyran-4-one	PIM1
Panax ginseng C. A. Meyer	5316891	7-Hydroxy-2,5-dimethyl-4H-1-benzopyran-4-one	AURKB
Panax ginseng C. A. Meyer	5316891	7-Hydroxy-2,5-dimethyl-4H-1-benzopyran-4-one	IGF1R
Panax ginseng C. A. Meyer	5316891	7-Hydroxy-2,5-dimethyl-4H-1-benzopyran-4-one	KDR
Panax ginseng C. A. Meyer	5316891	7-Hydroxy-2,5-dimethyl-4H-1-benzopyran-4-one	PLK1
Panax ginseng C. A. Meyer	5316891	7-Hydroxy-2,5-dimethyl-4H-1-benzopyran-4-one	MET
Panax ginseng C. A. Meyer	5316891	7-Hydroxy-2,5-dimethyl-4H-1-benzopyran-4-one	ALK
Panax ginseng C. A. Meyer	5316891	7-Hydroxy-2,5-dimethyl-4H-1-benzopyran-4-one	AXL
Panax ginseng C. A. Meyer	5316891	7-Hydroxy-2,5-dimethyl-4H-1-benzopyran-4-one	PTGS2
Panax ginseng C. A. Meyer	5316891	7-Hydroxy-2,5-dimethyl-4H-1-benzopyran-4-one	CYP19A1
Panax ginseng C. A. Meyer	5316891	7-Hydroxy-2,5-dimethyl-4H-1-benzopyran-4-one	CA2
Panax ginseng C. A. Meyer	5316891	7-Hydroxy-2,5-dimethyl-4H-1-benzopyran-4-one	CA1
Panax ginseng C. A. Meyer	5316891	7-Hydroxy-2,5-dimethyl-4H-1-benzopyran-4-one	HSD17B1
Panax ginseng C. A. Meyer	5316891	7-Hydroxy-2,5-dimethyl-4H-1-benzopyran-4-one	CA12
Panax ginseng C. A. Meyer	5316891	7-Hydroxy-2,5-dimethyl-4H-1-benzopyran-4-one	CA9
Panax ginseng C. A. Meyer	5316891	7-Hydroxy-2,5-dimethyl-4H-1-benzopyran-4-one	AKR1B10
Panax ginseng C. A. Meyer	5316891	7-Hydroxy-2,5-dimethyl-4H-1-benzopyran-4-one	AR
Panax ginseng C. A. Meyer	5316891	7-Hydroxy-2,5-dimethyl-4H-1-benzopyran-4-one	PARP1
Panax ginseng C. A. Meyer	5316891	7-Hydroxy-2,5-dimethyl-4H-1-benzopyran-4-one	TNKS2
Panax ginseng C. A. Meyer	5316891	7-Hydroxy-2,5-dimethyl-4H-1-benzopyran-4-one	TNKS
Panax ginseng C. A. Meyer	5316891	7-Hydroxy-2,5-dimethyl-4H-1-benzopyran-4-one	ESR1
Panax ginseng C. A. Meyer	5316891	7-Hydroxy-2,5-dimethyl-4H-1-benzopyran-4-one	ESR2
Panax ginseng C. A. Meyer	5316891	7-Hydroxy-2,5-dimethyl-4H-1-benzopyran-4-one	CDK5R1
Panax ginseng C. A. Meyer	5316891	7-Hydroxy-2,5-dimethyl-4H-1-benzopyran-4-one	XDH
Panax ginseng C. A. Meyer	5316891	7-Hydroxy-2,5-dimethyl-4H-1-benzopyran-4-one	CDK5
Panax ginseng C. A. Meyer	5316891	7-Hydroxy-2,5-dimethyl-4H-1-benzopyran-4-one	CDK1
Panax ginseng C. A. Meyer	5316891	7-Hydroxy-2,5-dimethyl-4H-1-benzopyran-4-one	CCNB1
Panax ginseng C. A. Meyer	5316891	7-Hydroxy-2,5-dimethyl-4H-1-benzopyran-4-one	CCNB2
Panax ginseng C. A. Meyer	5316891	7-Hydroxy-2,5-dimethyl-4H-1-benzopyran-4-one	CCNB3
Panax ginseng C. A. Meyer	5316891	7-Hydroxy-2,5-dimethyl-4H-1-benzopyran-4-one	CA7
Panax ginseng C. A. Meyer	5316891	7-Hydroxy-2,5-dimethyl-4H-1-benzopyran-4-one	CDK6
Panax ginseng C. A. Meyer	5316891	7-Hydroxy-2,5-dimethyl-4H-1-benzopyran-4-one	CA4
Panax ginseng C. A. Meyer	5316891	7-Hydroxy-2,5-dimethyl-4H-1-benzopyran-4-one	ABCB1
Panax ginseng C. A. Meyer	5316891	7-Hydroxy-2,5-dimethyl-4H-1-benzopyran-4-one	CYP1B1
Panax ginseng C. A. Meyer	5316891	7-Hydroxy-2,5-dimethyl-4H-1-benzopyran-4-one	ABCG2
Panax ginseng C. A. Meyer	5316891	7-Hydroxy-2,5-dimethyl-4H-1-benzopyran-4-one	CBR1
Panax ginseng C. A. Meyer	5316891	7-Hydroxy-2,5-dimethyl-4H-1-benzopyran-4-one	MAOA
Panax ginseng C. A. Meyer	5316891	7-Hydroxy-2,5-dimethyl-4H-1-benzopyran-4-one	CFTR
Panax ginseng C. A. Meyer	5316891	7-Hydroxy-2,5-dimethyl-4H-1-benzopyran-4-one	NOX4
Panax ginseng C. A. Meyer	5316891	7-Hydroxy-2,5-dimethyl-4H-1-benzopyran-4-one	FLT3
Panax ginseng C. A. Meyer	5316891	7-Hydroxy-2,5-dimethyl-4H-1-benzopyran-4-one	ACHE
Panax ginseng C. A. Meyer	5316891	7-Hydroxy-2,5-dimethyl-4H-1-benzopyran-4-one	SYK
Panax ginseng C. A. Meyer	5316891	7-Hydroxy-2,5-dimethyl-4H-1-benzopyran-4-one	GSK3B
Panax ginseng C. A. Meyer	5316891	7-Hydroxy-2,5-dimethyl-4H-1-benzopyran-4-one	ABCC1
Panax ginseng C. A. Meyer	5316891	7-Hydroxy-2,5-dimethyl-4H-1-benzopyran-4-one	TTR
Panax ginseng C. A. Meyer	5316891	7-Hydroxy-2,5-dimethyl-4H-1-benzopyran-4-one	CSNK2A1
Panax ginseng C. A. Meyer	5316891	7-Hydroxy-2,5-dimethyl-4H-1-benzopyran-4-one	ALOX12
Panax ginseng C. A. Meyer	5316891	7-Hydroxy-2,5-dimethyl-4H-1-benzopyran-4-one	GRK6
Panax ginseng C. A. Meyer	5316891	7-Hydroxy-2,5-dimethyl-4H-1-benzopyran-4-one	COMT
Panax ginseng C. A. Meyer	5316891	7-Hydroxy-2,5-dimethyl-4H-1-benzopyran-4-one	ALOX5
Panax ginseng C. A. Meyer	5316891	7-Hydroxy-2,5-dimethyl-4H-1-benzopyran-4-one	IKBKB
Panax ginseng C. A. Meyer	5316891	7-Hydroxy-2,5-dimethyl-4H-1-benzopyran-4-one	NTRK2
Panax ginseng C. A. Meyer	5316891	7-Hydroxy-2,5-dimethyl-4H-1-benzopyran-4-one	HTR2B
Panax ginseng C. A. Meyer	5316891	7-Hydroxy-2,5-dimethyl-4H-1-benzopyran-4-one	HTR3A
Panax ginseng C. A. Meyer	12306048	(+)-alpha-Cadinene	PPARA
Panax ginseng C. A. Meyer	12306048	(+)-alpha-Cadinene	CNR2
Panax ginseng C. A. Meyer	12306048	(+)-alpha-Cadinene	NR1H3
Panax ginseng C. A. Meyer	12306048	(+)-alpha-Cadinene	CYP19A1
Panax ginseng C. A. Meyer	13894537	Bicyclogermacrene	PPARA
Panax ginseng C. A. Meyer	13894537	Bicyclogermacrene	CNR2
Panax ginseng C. A. Meyer	13894537	Bicyclogermacrene	FAAH
Panax ginseng C. A. Meyer	13894537	Bicyclogermacrene	TRPV1
Panax ginseng C. A. Meyer	171548	Biotin	IDE
Panax ginseng C. A. Meyer	171548	Biotin	HLCS
Panax ginseng C. A. Meyer	171548	Biotin	ECE1
Panax ginseng C. A. Meyer	171548	Biotin	TBXAS1
Panax ginseng C. A. Meyer	171548	Biotin	GRM4
Panax ginseng C. A. Meyer	171548	Biotin	ITGAL
Panax ginseng C. A. Meyer	171548	Biotin	ICAM1
Panax ginseng C. A. Meyer	171548	Biotin	ITGB2
Panax ginseng C. A. Meyer	171548	Biotin	PTGDR2
Panax ginseng C. A. Meyer	171548	Biotin	PTGS2
Panax ginseng C. A. Meyer	171548	Biotin	PLA2G2A
Panax ginseng C. A. Meyer	171548	Biotin	PDE5A
Panax ginseng C. A. Meyer	171548	Biotin	PDE9A
Panax ginseng C. A. Meyer	171548	Biotin	HSPA1A
Panax ginseng C. A. Meyer	171548	Biotin	PPARG
Panax ginseng C. A. Meyer	171548	Biotin	PPARA
Panax ginseng C. A. Meyer	171548	Biotin	PTPRC
Panax ginseng C. A. Meyer	171548	Biotin	CXCL8
Panax ginseng C. A. Meyer	171548	Biotin	CDC25A
Panax ginseng C. A. Meyer	171548	Biotin	CDC25B
Panax ginseng C. A. Meyer	171548	Biotin	CA2
Panax ginseng C. A. Meyer	171548	Biotin	MIF
Panax ginseng C. A. Meyer	171548	Biotin	CA1
Panax ginseng C. A. Meyer	171548	Biotin	ACE2
Panax ginseng C. A. Meyer	171548	Biotin	MMP12
Panax ginseng C. A. Meyer	171548	Biotin	ITGAV
Panax ginseng C. A. Meyer	171548	Biotin	ITGB3
Panax ginseng C. A. Meyer	171548	Biotin	MTNR1A
Panax ginseng C. A. Meyer	171548	Biotin	AKR1B1
Panax ginseng C. A. Meyer	171548	Biotin	SLC22A12
Panax ginseng C. A. Meyer	171548	Biotin	PARP1
Panax ginseng C. A. Meyer	171548	Biotin	PARP2
Panax ginseng C. A. Meyer	171548	Biotin	PTGS1
Panax ginseng C. A. Meyer	171548	Biotin	TTR
Panax ginseng C. A. Meyer	171548	Biotin	CXCR1
Panax ginseng C. A. Meyer	171548	Biotin	AKR1C3
Panax ginseng C. A. Meyer	171548	Biotin	FABP1
Panax ginseng C. A. Meyer	171548	Biotin	AKR1B10
Panax ginseng C. A. Meyer	171548	Biotin	NOTUM
Panax ginseng C. A. Meyer	171548	Biotin	OXER1
Panax ginseng C. A. Meyer	171548	Biotin	AKR1A1
Panax ginseng C. A. Meyer	171548	Biotin	PDE7A
Panax ginseng C. A. Meyer	171548	Biotin	CTSA
Panax ginseng C. A. Meyer	171548	Biotin	PARP10
Panax ginseng C. A. Meyer	171548	Biotin	BCAT2
Panax ginseng C. A. Meyer	171548	Biotin	GRK2
Panax ginseng C. A. Meyer	171548	Biotin	CXCR2
Panax ginseng C. A. Meyer	171548	Biotin	KDM6B
Panax ginseng C. A. Meyer	171548	Biotin	KDM4C
Panax ginseng C. A. Meyer	171548	Biotin	SLC16A3
Panax ginseng C. A. Meyer	171548	Biotin	DYRK1A
Panax ginseng C. A. Meyer	171548	Biotin	MMP13
Panax ginseng C. A. Meyer	171548	Biotin	ITGB1
Panax ginseng C. A. Meyer	171548	Biotin	ITGA2
Panax ginseng C. A. Meyer	171548	Biotin	CSNK2A1
Panax ginseng C. A. Meyer	171548	Biotin	CNR1
Panax ginseng C. A. Meyer	171548	Biotin	CPA1
Panax ginseng C. A. Meyer	171548	Biotin	CA12
Panax ginseng C. A. Meyer	171548	Biotin	CA9
Panax ginseng C. A. Meyer	171548	Biotin	PARP15
Panax ginseng C. A. Meyer	171548	Biotin	ADORA1
Panax ginseng C. A. Meyer	171548	Biotin	CES1
Panax ginseng C. A. Meyer	171548	Biotin	CES2
Panax ginseng C. A. Meyer	171548	Biotin	CHRM1
Panax ginseng C. A. Meyer	171548	Biotin	EDNRA
Panax ginseng C. A. Meyer	171548	Biotin	CREBBP
Panax ginseng C. A. Meyer	171548	Biotin	TNKS
Panax ginseng C. A. Meyer	171548	Biotin	THRA
Panax ginseng C. A. Meyer	171548	Biotin	THRB
Panax ginseng C. A. Meyer	171548	Biotin	AKR1C1
Panax ginseng C. A. Meyer	171548	Biotin	FOLH1
Panax ginseng C. A. Meyer	171548	Biotin	PLCD1
Panax ginseng C. A. Meyer	171548	Biotin	CAPN1
Panax ginseng C. A. Meyer	171548	Biotin	APEX1
Panax ginseng C. A. Meyer	171548	Biotin	GRK6
Panax ginseng C. A. Meyer	171548	Biotin	HCAR2
Panax ginseng C. A. Meyer	171548	Biotin	NEK2
Panax ginseng C. A. Meyer	171548	Biotin	EGFR
Panax ginseng C. A. Meyer	171548	Biotin	MAPK10
Panax ginseng C. A. Meyer	171548	Biotin	FDFT1
Panax ginseng C. A. Meyer	171548	Biotin	DAO
Panax ginseng C. A. Meyer	171548	Biotin	PAM
Panax ginseng C. A. Meyer	171548	Biotin	PDE4A
Panax ginseng C. A. Meyer	171548	Biotin	ADAM12
Panax ginseng C. A. Meyer	171548	Biotin	KDM4D
Panax ginseng C. A. Meyer	171548	Biotin	P4HTM
Panax ginseng C. A. Meyer	171548	Biotin	PIM2
Panax ginseng C. A. Meyer	171548	Biotin	PTPsigma
Panax ginseng C. A. Meyer	171548	Biotin	DUSP3
Panax ginseng C. A. Meyer	171548	Biotin	CPA3
Panax ginseng C. A. Meyer	171548	Biotin	HSP90AA1
Panax ginseng C. A. Meyer	171548	Biotin	CLK4
Panax ginseng C. A. Meyer	171548	Biotin	EGLN3
Panax ginseng C. A. Meyer	171548	Biotin	PPP5C
Panax ginseng C. A. Meyer	171548	Biotin	PPP1CA
Panax ginseng C. A. Meyer	171548	Biotin	SLC6A4
Panax ginseng C. A. Meyer	171548	Biotin	PYGL
Panax ginseng C. A. Meyer	171548	Biotin	IMPDH2
Panax ginseng C. A. Meyer	171548	Biotin	PIM1
Panax ginseng C. A. Meyer	171548	Biotin	CYP26A1
Panax ginseng C. A. Meyer	171548	Biotin	FFAR1
Panax ginseng C. A. Meyer	171548	Biotin	MAOB
Panax ginseng C. A. Meyer	171548	Biotin	KMO
Panax ginseng C. A. Meyer	92313	gamma-Cadinene	PPARA
Panax ginseng C. A. Meyer	92313	gamma-Cadinene	CNR2
Panax ginseng C. A. Meyer	92313	gamma-Cadinene	NR1H3
Panax ginseng C. A. Meyer	92313	gamma-Cadinene	CYP19A1
Panax ginseng C. A. Meyer	92313	gamma-Cadinene	AR
Panax ginseng C. A. Meyer	92313	gamma-Cadinene	ESR1
Panax ginseng C. A. Meyer	92313	gamma-Cadinene	CHRM2
Panax ginseng C. A. Meyer	92313	gamma-Cadinene	ACHE
Panax ginseng C. A. Meyer	92313	gamma-Cadinene	SLC6A2
Panax ginseng C. A. Meyer	92313	gamma-Cadinene	SLC6A4
Panax ginseng C. A. Meyer	92313	gamma-Cadinene	CYP2C19
Panax ginseng C. A. Meyer	441005	(+)-delta-Cadinene	PPARA
Panax ginseng C. A. Meyer	441005	(+)-delta-Cadinene	CNR2
Panax ginseng C. A. Meyer	441005	(+)-delta-Cadinene	TRPV1
Panax ginseng C. A. Meyer	441005	(+)-delta-Cadinene	GLI2
Panax ginseng C. A. Meyer	441005	(+)-delta-Cadinene	GLI1
Panax ginseng C. A. Meyer	158103	Gomisin N	ATR
Panax ginseng C. A. Meyer	31404	Butylated hydroxytoluene	CA2
Panax ginseng C. A. Meyer	31404	Butylated hydroxytoluene	GABRA1
Panax ginseng C. A. Meyer	31404	Butylated hydroxytoluene	GABRB2
Panax ginseng C. A. Meyer	31404	Butylated hydroxytoluene	GABRG2
Panax ginseng C. A. Meyer	31404	Butylated hydroxytoluene	HTR2B
Panax ginseng C. A. Meyer	31404	Butylated hydroxytoluene	GABRB3
Panax ginseng C. A. Meyer	31404	Butylated hydroxytoluene	PTGS1
Panax ginseng C. A. Meyer	31404	Butylated hydroxytoluene	SLC6A2
Panax ginseng C. A. Meyer	31404	Butylated hydroxytoluene	HTR2C
Panax ginseng C. A. Meyer	31404	Butylated hydroxytoluene	GABBR2
Panax ginseng C. A. Meyer	31404	Butylated hydroxytoluene	GABBR1
Panax ginseng C. A. Meyer	31404	Butylated hydroxytoluene	RORC
Panax ginseng C. A. Meyer	31404	Butylated hydroxytoluene	ESRRG
Panax ginseng C. A. Meyer	31404	Butylated hydroxytoluene	TRPA1
Panax ginseng C. A. Meyer	31404	Butylated hydroxytoluene	ESR2
Panax ginseng C. A. Meyer	31404	Butylated hydroxytoluene	ESR1
Panax ginseng C. A. Meyer	31404	Butylated hydroxytoluene	HTR6
Panax ginseng C. A. Meyer	31404	Butylated hydroxytoluene	TYR
Panax ginseng C. A. Meyer	31404	Butylated hydroxytoluene	NOS1
Panax ginseng C. A. Meyer	31404	Butylated hydroxytoluene	NOS3
Panax ginseng C. A. Meyer	3082861	Ginsenol	UGT2B7
Panax ginseng C. A. Meyer	3082861	Ginsenol	CDC25A
Panax ginseng C. A. Meyer	3082861	Ginsenol	CDC25B
Panax ginseng C. A. Meyer	3082861	Ginsenol	AR
Panax ginseng C. A. Meyer	3082861	Ginsenol	POLA1
Panax ginseng C. A. Meyer	3082861	Ginsenol	NR1H4
Panax ginseng C. A. Meyer	3082861	Ginsenol	SHH
Panax ginseng C. A. Meyer	3082861	Ginsenol	ESR1
Panax ginseng C. A. Meyer	3082861	Ginsenol	ESR2
Panax ginseng C. A. Meyer	3082861	Ginsenol	TRPM8
Panax ginseng C. A. Meyer	3082861	Ginsenol	HSD11B1
Panax ginseng C. A. Meyer	3082861	Ginsenol	SHBG
Panax ginseng C. A. Meyer	3082861	Ginsenol	CA2
Panax ginseng C. A. Meyer	3082861	Ginsenol	CA1
Panax ginseng C. A. Meyer	3082861	Ginsenol	CA4
Panax ginseng C. A. Meyer	3082861	Ginsenol	NR1I3
Panax ginseng C. A. Meyer	3082861	Ginsenol	NPC1L1
Panax ginseng C. A. Meyer	3082861	Ginsenol	GPBAR1
Panax ginseng C. A. Meyer	3082861	Ginsenol	G6PD
Panax ginseng C. A. Meyer	3082861	Ginsenol	GABBR1
Panax ginseng C. A. Meyer	3082861	Ginsenol	CYP19A1
Panax ginseng C. A. Meyer	21574489	(1R,6R,9R)-4,9,11,11-Tetramethyltricyclo[4.3.2.01,5]undec-4-ene	PPARA
Panax ginseng C. A. Meyer	21574489	(1R,6R,9R)-4,9,11,11-Tetramethyltricyclo[4.3.2.01,5]undec-4-ene	CNR2
Panax ginseng C. A. Meyer	21574489	(1R,6R,9R)-4,9,11,11-Tetramethyltricyclo[4.3.2.01,5]undec-4-ene	NR1I3
Panax ginseng C. A. Meyer	21574489	(1R,6R,9R)-4,9,11,11-Tetramethyltricyclo[4.3.2.01,5]undec-4-ene	AR
Panax ginseng C. A. Meyer	21574489	(1R,6R,9R)-4,9,11,11-Tetramethyltricyclo[4.3.2.01,5]undec-4-ene	CYP19A1
Panax ginseng C. A. Meyer	21574489	(1R,6R,9R)-4,9,11,11-Tetramethyltricyclo[4.3.2.01,5]undec-4-ene	ESR1
Panax ginseng C. A. Meyer	21574489	(1R,6R,9R)-4,9,11,11-Tetramethyltricyclo[4.3.2.01,5]undec-4-ene	CHRM2
Panax ginseng C. A. Meyer	21574489	(1R,6R,9R)-4,9,11,11-Tetramethyltricyclo[4.3.2.01,5]undec-4-ene	SLC6A2
Panax ginseng C. A. Meyer	21574489	(1R,6R,9R)-4,9,11,11-Tetramethyltricyclo[4.3.2.01,5]undec-4-ene	SLC6A4
Panax ginseng C. A. Meyer	21574489	(1R,6R,9R)-4,9,11,11-Tetramethyltricyclo[4.3.2.01,5]undec-4-ene	CYP2C19
Panax ginseng C. A. Meyer	21574489	(1R,6R,9R)-4,9,11,11-Tetramethyltricyclo[4.3.2.01,5]undec-4-ene	UGT2B7
Panax ginseng C. A. Meyer	21574489	(1R,6R,9R)-4,9,11,11-Tetramethyltricyclo[4.3.2.01,5]undec-4-ene	BCHE
Panax ginseng C. A. Meyer	21574489	(1R,6R,9R)-4,9,11,11-Tetramethyltricyclo[4.3.2.01,5]undec-4-ene	ACHE
Panax ginseng C. A. Meyer	3001662	Gomisin A	ATR
Panax ginseng C. A. Meyer	3001662	Gomisin A	ALOX5
Panax ginseng C. A. Meyer	3001662	Gomisin A	MAPK14
Panax ginseng C. A. Meyer	3001662	Gomisin A	CCND1
Panax ginseng C. A. Meyer	3001662	Gomisin A	CCNE2
Panax ginseng C. A. Meyer	3001662	Gomisin A	CDK4
Panax ginseng C. A. Meyer	3001662	Gomisin A	CDK2
Panax ginseng C. A. Meyer	3001662	Gomisin A	CCNE1
Panax ginseng C. A. Meyer	3001662	Gomisin A	JAK1
Panax ginseng C. A. Meyer	3001662	Gomisin A	TGFBR1
Panax ginseng C. A. Meyer	3001662	Gomisin A	CFD
Panax ginseng C. A. Meyer	3001662	Gomisin A	JAK2
Panax ginseng C. A. Meyer	3001662	Gomisin A	NQO1
Panax ginseng C. A. Meyer	3001662	Gomisin A	LTB4R
Panax ginseng C. A. Meyer	3001662	Gomisin A	NQO2
Panax ginseng C. A. Meyer	3001662	Gomisin A	PIK3CA
Panax ginseng C. A. Meyer	3001662	Gomisin A	HMGCR
Panax ginseng C. A. Meyer	3001662	Gomisin A	TYRO3
Panax ginseng C. A. Meyer	3001662	Gomisin A	MAPK8
Panax ginseng C. A. Meyer	3001662	Gomisin A	PDE2A
Panax ginseng C. A. Meyer	3001662	Gomisin A	PDE10A
Panax ginseng C. A. Meyer	3001662	Gomisin A	MTOR
Panax ginseng C. A. Meyer	3001662	Gomisin A	PSEN2
Panax ginseng C. A. Meyer	3001662	Gomisin A	PSENEN
Panax ginseng C. A. Meyer	3001662	Gomisin A	NCSTN
Panax ginseng C. A. Meyer	3001662	Gomisin A	APH1A
Panax ginseng C. A. Meyer	3001662	Gomisin A	PSEN1
Panax ginseng C. A. Meyer	3001662	Gomisin A	APH1B
Panax ginseng C. A. Meyer	3001662	Gomisin A	GPR88
Panax ginseng C. A. Meyer	3001662	Gomisin A	EGFR
Panax ginseng C. A. Meyer	3001662	Gomisin A	GCK
Panax ginseng C. A. Meyer	3001662	Gomisin A	MDM2
Panax ginseng C. A. Meyer	3001662	Gomisin A	PDE5A
Panax ginseng C. A. Meyer	3001662	Gomisin A	THRB
Panax ginseng C. A. Meyer	3001662	Gomisin A	KCNH2
Panax ginseng C. A. Meyer	3001662	Gomisin A	NPY5R
Panax ginseng C. A. Meyer	3001662	Gomisin A	NTRK1
Panax ginseng C. A. Meyer	3001662	Gomisin A	LRRK2
Panax ginseng C. A. Meyer	3001662	Gomisin A	GABRB3
Panax ginseng C. A. Meyer	3001662	Gomisin A	GABRA2
Panax ginseng C. A. Meyer	3001662	Gomisin A	GABRA3
Panax ginseng C. A. Meyer	3001662	Gomisin A	GABRG2
Panax ginseng C. A. Meyer	3001662	Gomisin A	GABRA1
Panax ginseng C. A. Meyer	3001662	Gomisin A	GABRA5
Panax ginseng C. A. Meyer	3001662	Gomisin A	GSK3B
Panax ginseng C. A. Meyer	3001662	Gomisin A	PRKCB
Panax ginseng C. A. Meyer	3001662	Gomisin A	PRKDC
Panax ginseng C. A. Meyer	3001662	Gomisin A	JAK3
Panax ginseng C. A. Meyer	3001662	Gomisin A	CDK5R1
Panax ginseng C. A. Meyer	3001662	Gomisin A	CDK5
Panax ginseng C. A. Meyer	3001662	Gomisin A	ABCC9
Panax ginseng C. A. Meyer	3001662	Gomisin A	F10
Panax ginseng C. A. Meyer	3001662	Gomisin A	ABCB1
Panax ginseng C. A. Meyer	3001662	Gomisin A	CSNK2A1
Panax ginseng C. A. Meyer	3001662	Gomisin A	MET
Panax ginseng C. A. Meyer	3001662	Gomisin A	CSNK2A2
Panax ginseng C. A. Meyer	3001662	Gomisin A	PIM1
Panax ginseng C. A. Meyer	3001662	Gomisin A	KCNK3
Panax ginseng C. A. Meyer	3001662	Gomisin A	MAPK11
Panax ginseng C. A. Meyer	3001662	Gomisin A	PIM2
Panax ginseng C. A. Meyer	3001662	Gomisin A	MKNK1
Panax ginseng C. A. Meyer	3001662	Gomisin A	ERBB2
Panax ginseng C. A. Meyer	3001662	Gomisin A	FLT3
Panax ginseng C. A. Meyer	3001662	Gomisin A	KDR
Panax ginseng C. A. Meyer	3001662	Gomisin A	TACR1
Panax ginseng C. A. Meyer	3001662	Gomisin A	NAMPT
Panax ginseng C. A. Meyer	3001662	Gomisin A	RAF1
Panax ginseng C. A. Meyer	3001662	Gomisin A	CDK1
Panax ginseng C. A. Meyer	3001662	Gomisin A	BRAF
Panax ginseng C. A. Meyer	3001662	Gomisin A	FKBP1A
Panax ginseng C. A. Meyer	3001662	Gomisin A	CHEK1
Panax ginseng C. A. Meyer	3001662	Gomisin A	SYK
Panax ginseng C. A. Meyer	3001662	Gomisin A	ADAM17
Panax ginseng C. A. Meyer	3001662	Gomisin A	PTGER1
Panax ginseng C. A. Meyer	3001662	Gomisin A	ALOX5AP
Panax ginseng C. A. Meyer	3001662	Gomisin A	MAPK10
Panax ginseng C. A. Meyer	3001662	Gomisin A	ROCK2
Panax ginseng C. A. Meyer	3001662	Gomisin A	P2RX3
Panax ginseng C. A. Meyer	3001662	Gomisin A	PRKCA
Panax ginseng C. A. Meyer	3001662	Gomisin A	ROCK1
Panax ginseng C. A. Meyer	3001662	Gomisin A	TYK2
Panax ginseng C. A. Meyer	3001662	Gomisin A	AURKA
Panax ginseng C. A. Meyer	3001662	Gomisin A	DYRK1A
Panax ginseng C. A. Meyer	3001662	Gomisin A	CCR1
Panax ginseng C. A. Meyer	3001662	Gomisin A	CXCR2
Panax ginseng C. A. Meyer	3001662	Gomisin A	CLK4
Panax ginseng C. A. Meyer	3001662	Gomisin A	CLK1
Panax ginseng C. A. Meyer	3001662	Gomisin A	CLK2
Panax ginseng C. A. Meyer	3001662	Gomisin A	CLK3
Panax ginseng C. A. Meyer	3001662	Gomisin A	CX3CR1
Panax ginseng C. A. Meyer	3001662	Gomisin A	DYRK1B
Panax ginseng C. A. Meyer	3001662	Gomisin A	LIMK2
Panax ginseng C. A. Meyer	3001662	Gomisin A	SMO
Panax ginseng C. A. Meyer	3001662	Gomisin A	AR
Panax ginseng C. A. Meyer	3001662	Gomisin A	MMP13
Panax ginseng C. A. Meyer	3001662	Gomisin A	PRKCD
Panax ginseng C. A. Meyer	3001662	Gomisin A	PRKD1
Panax ginseng C. A. Meyer	3001662	Gomisin A	MMP14
Panax ginseng C. A. Meyer	3001662	Gomisin A	STAT3
Panax ginseng C. A. Meyer	3001662	Gomisin A	MMP7
Panax ginseng C. A. Meyer	3001662	Gomisin A	KCNA5
Panax ginseng C. A. Meyer	3001662	Gomisin A	ADAM10
Panax ginseng C. A. Meyer	3001662	Gomisin A	F2
Panax ginseng C. A. Meyer	3001662	Gomisin A	THRA
Panax ginseng C. A. Meyer	3001662	Gomisin A	CCNA2
Panax ginseng C. A. Meyer	3001662	Gomisin A	EPHB4
Panax ginseng C. A. Meyer	3001662	Gomisin A	HRH1
Panax ginseng C. A. Meyer	3001662	Gomisin A	CCR3
Panax ginseng C. A. Meyer	3001662	Gomisin A	HDAC4
Panax ginseng C. A. Meyer	3001662	Gomisin A	AXL
Panax ginseng C. A. Meyer	12306049	(+)-alpha-Muurolene	PPARA
Panax ginseng C. A. Meyer	12306049	(+)-alpha-Muurolene	CNR2
Panax ginseng C. A. Meyer	12306049	(+)-alpha-Muurolene	NR1H3
Panax ginseng C. A. Meyer	12306049	(+)-alpha-Muurolene	CYP19A1
Panax ginseng C. A. Meyer	15973057	alpha-Neoclovene	PPARA
Panax ginseng C. A. Meyer	15973057	alpha-Neoclovene	CNR2
Panax ginseng C. A. Meyer	15973057	alpha-Neoclovene	AR
Panax ginseng C. A. Meyer	15973057	alpha-Neoclovene	CYP19A1
Panax ginseng C. A. Meyer	15973057	alpha-Neoclovene	ESR1
Panax ginseng C. A. Meyer	15973057	alpha-Neoclovene	CHRM2
Panax ginseng C. A. Meyer	15973057	alpha-Neoclovene	SLC6A2
Panax ginseng C. A. Meyer	15973057	alpha-Neoclovene	SLC6A4
Panax ginseng C. A. Meyer	15973057	alpha-Neoclovene	CYP2C19
Panax ginseng C. A. Meyer	15973057	alpha-Neoclovene	BCHE
Panax ginseng C. A. Meyer	15973057	alpha-Neoclovene	PTPN1
Panax ginseng C. A. Meyer	15973057	alpha-Neoclovene	ACHE
Panax ginseng C. A. Meyer	15973057	alpha-Neoclovene	NR1I3
Panax ginseng C. A. Meyer	15973057	alpha-Neoclovene	RORC
Panax ginseng C. A. Meyer	15973057	alpha-Neoclovene	SREBF2
Panax ginseng C. A. Meyer	15973057	alpha-Neoclovene	NPC1L1
Panax ginseng C. A. Meyer	15973057	alpha-Neoclovene	ESR2
Panax ginseng C. A. Meyer	15973057	alpha-Neoclovene	CTSD
Panax ginseng C. A. Meyer	15973057	alpha-Neoclovene	NR1H3
Panax ginseng C. A. Meyer	15973057	alpha-Neoclovene	SHBG
Panax ginseng C. A. Meyer	15973057	alpha-Neoclovene	CYP17A1
Panax ginseng C. A. Meyer	15973057	alpha-Neoclovene	HMGCR
Panax ginseng C. A. Meyer	15973057	alpha-Neoclovene	CYP51A1
Panax ginseng C. A. Meyer	15973057	alpha-Neoclovene	FAAH
Panax ginseng C. A. Meyer	15973057	alpha-Neoclovene	TRPV1
Panax ginseng C. A. Meyer	15973057	alpha-Neoclovene	SRD5A1
Panax ginseng C. A. Meyer	15973057	alpha-Neoclovene	SRD5A2
Panax ginseng C. A. Meyer	15973057	alpha-Neoclovene	NR3C2
Panax ginseng C. A. Meyer	15973057	alpha-Neoclovene	NR3C1
Panax ginseng C. A. Meyer	15973057	alpha-Neoclovene	PGR
Panax ginseng C. A. Meyer	15973057	alpha-Neoclovene	SERPINA6
Panax ginseng C. A. Meyer	15973057	alpha-Neoclovene	SIGMAR1
Panax ginseng C. A. Meyer	15973057	alpha-Neoclovene	NR1I2
Panax ginseng C. A. Meyer	15973057	alpha-Neoclovene	HSD17B3
Panax ginseng C. A. Meyer	15973057	alpha-Neoclovene	FABP1
Panax ginseng C. A. Meyer	11877394	Neointermedeol	UGT2B7
Panax ginseng C. A. Meyer	11877394	Neointermedeol	HSD11B1
Panax ginseng C. A. Meyer	11877394	Neointermedeol	PTGS1
Panax ginseng C. A. Meyer	11877394	Neointermedeol	NR1H3
Panax ginseng C. A. Meyer	11877394	Neointermedeol	CYP19A1
Panax ginseng C. A. Meyer	11877394	Neointermedeol	SLC6A4
Panax ginseng C. A. Meyer	11877394	Neointermedeol	SAE1
Panax ginseng C. A. Meyer	11877394	Neointermedeol	UBA2
Panax ginseng C. A. Meyer	11877394	Neointermedeol	POLB
Panax ginseng C. A. Meyer	11877394	Neointermedeol	AKR1B10
Panax ginseng C. A. Meyer	11877394	Neointermedeol	BCHE
Panax ginseng C. A. Meyer	11877394	Neointermedeol	AR
Panax ginseng C. A. Meyer	11877394	Neointermedeol	TRPM8
Panax ginseng C. A. Meyer	11877394	Neointermedeol	ICMT
Panax ginseng C. A. Meyer	11877394	Neointermedeol	PABPC1
Panax ginseng C. A. Meyer	21574488	(1R,3As,8aS)-1,4,4,6-tetramethyl-2,3,3a,5,7,8-hexahydro-1H-cyclopenta[h]pentalene	PPARA
Panax ginseng C. A. Meyer	21574488	(1R,3As,8aS)-1,4,4,6-tetramethyl-2,3,3a,5,7,8-hexahydro-1H-cyclopenta[h]pentalene	CNR2
Panax ginseng C. A. Meyer	21574488	(1R,3As,8aS)-1,4,4,6-tetramethyl-2,3,3a,5,7,8-hexahydro-1H-cyclopenta[h]pentalene	NR1I3
Panax ginseng C. A. Meyer	21574488	(1R,3As,8aS)-1,4,4,6-tetramethyl-2,3,3a,5,7,8-hexahydro-1H-cyclopenta[h]pentalene	FAAH
Panax ginseng C. A. Meyer	21574488	(1R,3As,8aS)-1,4,4,6-tetramethyl-2,3,3a,5,7,8-hexahydro-1H-cyclopenta[h]pentalene	TRPV1
Panax ginseng C. A. Meyer	21574488	(1R,3As,8aS)-1,4,4,6-tetramethyl-2,3,3a,5,7,8-hexahydro-1H-cyclopenta[h]pentalene	AR
Panax ginseng C. A. Meyer	21574488	(1R,3As,8aS)-1,4,4,6-tetramethyl-2,3,3a,5,7,8-hexahydro-1H-cyclopenta[h]pentalene	CYP19A1
Panax ginseng C. A. Meyer	21574488	(1R,3As,8aS)-1,4,4,6-tetramethyl-2,3,3a,5,7,8-hexahydro-1H-cyclopenta[h]pentalene	ESR1
Panax ginseng C. A. Meyer	21574488	(1R,3As,8aS)-1,4,4,6-tetramethyl-2,3,3a,5,7,8-hexahydro-1H-cyclopenta[h]pentalene	CHRM2
Panax ginseng C. A. Meyer	21574488	(1R,3As,8aS)-1,4,4,6-tetramethyl-2,3,3a,5,7,8-hexahydro-1H-cyclopenta[h]pentalene	SLC6A2
Panax ginseng C. A. Meyer	21574488	(1R,3As,8aS)-1,4,4,6-tetramethyl-2,3,3a,5,7,8-hexahydro-1H-cyclopenta[h]pentalene	SLC6A4
Panax ginseng C. A. Meyer	21574488	(1R,3As,8aS)-1,4,4,6-tetramethyl-2,3,3a,5,7,8-hexahydro-1H-cyclopenta[h]pentalene	CYP2C19
Panax ginseng C. A. Meyer	23242103	(2As,4aR,8aR)-2,2,4a-trimethyl-8-methylidene-2a,3,4,5,6,7-hexahydro-1H-cyclobuta[i]indene	HSD11B1
Panax ginseng C. A. Meyer	23242103	(2As,4aR,8aR)-2,2,4a-trimethyl-8-methylidene-2a,3,4,5,6,7-hexahydro-1H-cyclobuta[i]indene	UGT2B7
Panax ginseng C. A. Meyer	23242103	(2As,4aR,8aR)-2,2,4a-trimethyl-8-methylidene-2a,3,4,5,6,7-hexahydro-1H-cyclobuta[i]indene	PPARA
Panax ginseng C. A. Meyer	23242103	(2As,4aR,8aR)-2,2,4a-trimethyl-8-methylidene-2a,3,4,5,6,7-hexahydro-1H-cyclobuta[i]indene	CNR2
Panax ginseng C. A. Meyer	91748736	alpha-Panasinsen	PPARA
Panax ginseng C. A. Meyer	91748736	alpha-Panasinsen	CNR2
Panax ginseng C. A. Meyer	91748736	alpha-Panasinsen	AR
Panax ginseng C. A. Meyer	91748736	alpha-Panasinsen	CYP19A1
Panax ginseng C. A. Meyer	91748736	alpha-Panasinsen	ESR1
Panax ginseng C. A. Meyer	91748736	alpha-Panasinsen	CHRM2
Panax ginseng C. A. Meyer	91748736	alpha-Panasinsen	SLC6A2
Panax ginseng C. A. Meyer	91748736	alpha-Panasinsen	SLC6A4
Panax ginseng C. A. Meyer	91748736	alpha-Panasinsen	CYP2C19
Panax ginseng C. A. Meyer	91748736	alpha-Panasinsen	BCHE
Panax ginseng C. A. Meyer	21574487	(1R,2S,5S)-1-Isopropenyl-2-ethenyl-2,6,6-trimethylbicyclo[3.2.0]heptane-	PPARA
Panax ginseng C. A. Meyer	21574487	(1R,2S,5S)-1-Isopropenyl-2-ethenyl-2,6,6-trimethylbicyclo[3.2.0]heptane-	CNR2
Panax ginseng C. A. Meyer	10655819	Selina-4(15),7(11)-diene	PPARA
Panax ginseng C. A. Meyer	10655819	Selina-4(15),7(11)-diene	CNR2
Panax ginseng C. A. Meyer	11052745	5-Epi-alpha-selinene	CYP19A1
Panax ginseng C. A. Meyer	11052745	5-Epi-alpha-selinene	AR
Panax ginseng C. A. Meyer	11052745	5-Epi-alpha-selinene	ESR1
Panax ginseng C. A. Meyer	11052745	5-Epi-alpha-selinene	CHRM2
Panax ginseng C. A. Meyer	11052745	5-Epi-alpha-selinene	ACHE
Panax ginseng C. A. Meyer	11052745	5-Epi-alpha-selinene	SLC6A2
Panax ginseng C. A. Meyer	11052745	5-Epi-alpha-selinene	SLC6A4
Panax ginseng C. A. Meyer	11052745	5-Epi-alpha-selinene	CYP2C19
Panax ginseng C. A. Meyer	11052745	5-Epi-alpha-selinene	NR1H3
Panax ginseng C. A. Meyer	11052745	5-Epi-alpha-selinene	BCHE
Panax ginseng C. A. Meyer	11052745	5-Epi-alpha-selinene	PTPN1
Panax ginseng C. A. Meyer	11052745	5-Epi-alpha-selinene	PPARA
Panax ginseng C. A. Meyer	11052745	5-Epi-alpha-selinene	CNR2
Panax ginseng C. A. Meyer	11052745	5-Epi-alpha-selinene	NR1I3
Panax ginseng C. A. Meyer	11052745	5-Epi-alpha-selinene	FAAH
Panax ginseng C. A. Meyer	11052745	5-Epi-alpha-selinene	TRPV1
Panax ginseng C. A. Meyer	11052745	5-Epi-alpha-selinene	ESR2
Panax ginseng C. A. Meyer	94334	Widdrol	CYP17A1
Panax ginseng C. A. Meyer	94334	Widdrol	CYP19A1
Panax ginseng C. A. Meyer	94334	Widdrol	NR1H3
Panax ginseng C. A. Meyer	94334	Widdrol	RORC
Panax ginseng C. A. Meyer	94334	Widdrol	SREBF2
Panax ginseng C. A. Meyer	94334	Widdrol	NPC1L1
Panax ginseng C. A. Meyer	94334	Widdrol	CYP51A1
Panax ginseng C. A. Meyer	94334	Widdrol	HMGCR
Panax ginseng C. A. Meyer	94334	Widdrol	AR
Panax ginseng C. A. Meyer	94334	Widdrol	ESR1
Panax ginseng C. A. Meyer	94334	Widdrol	SHBG
Panax ginseng C. A. Meyer	94334	Widdrol	BCHE
Panax ginseng C. A. Meyer	94334	Widdrol	ESR2
Panax ginseng C. A. Meyer	94334	Widdrol	RORA
Panax ginseng C. A. Meyer	94334	Widdrol	NR1I3
Panax ginseng C. A. Meyer	94334	Widdrol	G6PD
Panax ginseng C. A. Meyer	94334	Widdrol	UGT2B7
Panax ginseng C. A. Meyer	94334	Widdrol	CHRM2
Panax ginseng C. A. Meyer	94334	Widdrol	ACHE
Panax ginseng C. A. Meyer	94334	Widdrol	SLC6A2
Panax ginseng C. A. Meyer	94334	Widdrol	SLC6A4
Panax ginseng C. A. Meyer	94334	Widdrol	CYP2C19
Panax ginseng C. A. Meyer	94334	Widdrol	IDO1
Panax ginseng C. A. Meyer	94334	Widdrol	SQLE
Panax ginseng C. A. Meyer	94334	Widdrol	PTGER1
Panax ginseng C. A. Meyer	94334	Widdrol	PTGER2
Panax ginseng C. A. Meyer	94334	Widdrol	PPARA
Panax ginseng C. A. Meyer	94334	Widdrol	PPARD
Panax ginseng C. A. Meyer	94334	Widdrol	PTPN1
Panax ginseng C. A. Meyer	94334	Widdrol	VDR
Panax ginseng C. A. Meyer	94334	Widdrol	SERPINA6
Panax ginseng C. A. Meyer	94334	Widdrol	CES2
Panax ginseng C. A. Meyer	94334	Widdrol	HSD11B1
Panax ginseng C. A. Meyer	94334	Widdrol	TBXAS1
Panax ginseng C. A. Meyer	94334	Widdrol	PTPN6
Panax ginseng C. A. Meyer	94334	Widdrol	PTPN2
Panax ginseng C. A. Meyer	94334	Widdrol	FDFT1
Panax ginseng C. A. Meyer	94334	Widdrol	PTGES
Rhodiola crenulata( Hook.f.et Thoms.)H. Ohba	5280863	Kaempferol	NOX4
Rhodiola crenulata( Hook.f.et Thoms.)H. Ohba	5280863	Kaempferol	AKR1B1
Rhodiola crenulata( Hook.f.et Thoms.)H. Ohba	5280863	Kaempferol	XDH
Rhodiola crenulata( Hook.f.et Thoms.)H. Ohba	5280863	Kaempferol	TYR
Rhodiola crenulata( Hook.f.et Thoms.)H. Ohba	5280863	Kaempferol	FLT3
Rhodiola crenulata( Hook.f.et Thoms.)H. Ohba	5280863	Kaempferol	CA2
Rhodiola crenulata( Hook.f.et Thoms.)H. Ohba	5280863	Kaempferol	ALOX5
Rhodiola crenulata( Hook.f.et Thoms.)H. Ohba	5280863	Kaempferol	CA7
Rhodiola crenulata( Hook.f.et Thoms.)H. Ohba	5280863	Kaempferol	HSD17B2
Rhodiola crenulata( Hook.f.et Thoms.)H. Ohba	5280863	Kaempferol	ABCC1
Rhodiola crenulata( Hook.f.et Thoms.)H. Ohba	5280863	Kaempferol	HSD17B1
Rhodiola crenulata( Hook.f.et Thoms.)H. Ohba	5280863	Kaempferol	AHR
Rhodiola crenulata( Hook.f.et Thoms.)H. Ohba	5280863	Kaempferol	CA12
Rhodiola crenulata( Hook.f.et Thoms.)H. Ohba	5280863	Kaempferol	ESRRA
Rhodiola crenulata( Hook.f.et Thoms.)H. Ohba	5280863	Kaempferol	ABCB1
Rhodiola crenulata( Hook.f.et Thoms.)H. Ohba	5280863	Kaempferol	CYP1B1
Rhodiola crenulata( Hook.f.et Thoms.)H. Ohba	5280863	Kaempferol	ABCG2
Rhodiola crenulata( Hook.f.et Thoms.)H. Ohba	5280863	Kaempferol	ADORA1
Rhodiola crenulata( Hook.f.et Thoms.)H. Ohba	5280863	Kaempferol	CA4
Rhodiola crenulata( Hook.f.et Thoms.)H. Ohba	5280863	Kaempferol	ACHE
Rhodiola crenulata( Hook.f.et Thoms.)H. Ohba	5280863	Kaempferol	MAOA
Rhodiola crenulata( Hook.f.et Thoms.)H. Ohba	5280863	Kaempferol	GLO1
Rhodiola crenulata( Hook.f.et Thoms.)H. Ohba	5280863	Kaempferol	SYK
Rhodiola crenulata( Hook.f.et Thoms.)H. Ohba	5280863	Kaempferol	GSK3B
Rhodiola crenulata( Hook.f.et Thoms.)H. Ohba	5280863	Kaempferol	MMP9
Rhodiola crenulata( Hook.f.et Thoms.)H. Ohba	5280863	Kaempferol	MMP2
Rhodiola crenulata( Hook.f.et Thoms.)H. Ohba	5280863	Kaempferol	ALOX15
Rhodiola crenulata( Hook.f.et Thoms.)H. Ohba	5280863	Kaempferol	ALOX12
Rhodiola crenulata( Hook.f.et Thoms.)H. Ohba	5280863	Kaempferol	PTPRS
Rhodiola crenulata( Hook.f.et Thoms.)H. Ohba	5280863	Kaempferol	ADORA2A
Rhodiola crenulata( Hook.f.et Thoms.)H. Ohba	5280863	Kaempferol	CDK5R1
Rhodiola crenulata( Hook.f.et Thoms.)H. Ohba	5280863	Kaempferol	CCNB3
Rhodiola crenulata( Hook.f.et Thoms.)H. Ohba	5280863	Kaempferol	CDK5
Rhodiola crenulata( Hook.f.et Thoms.)H. Ohba	5280863	Kaempferol	CDK1
Rhodiola crenulata( Hook.f.et Thoms.)H. Ohba	5280863	Kaempferol	CCNB1
Rhodiola crenulata( Hook.f.et Thoms.)H. Ohba	5280863	Kaempferol	CCNB2
Rhodiola crenulata( Hook.f.et Thoms.)H. Ohba	5280863	Kaempferol	ARG1
Rhodiola crenulata( Hook.f.et Thoms.)H. Ohba	5280863	Kaempferol	GPR35
Rhodiola crenulata( Hook.f.et Thoms.)H. Ohba	5280863	Kaempferol	ESR2
Rhodiola crenulata( Hook.f.et Thoms.)H. Ohba	5280863	Kaempferol	DAPK1
Rhodiola crenulata( Hook.f.et Thoms.)H. Ohba	5280863	Kaempferol	MPG
Rhodiola crenulata( Hook.f.et Thoms.)H. Ohba	5280863	Kaempferol	SLC22A12
Rhodiola crenulata( Hook.f.et Thoms.)H. Ohba	5280863	Kaempferol	TTR
Rhodiola crenulata( Hook.f.et Thoms.)H. Ohba	5280863	Kaempferol	AKR1B10
Rhodiola crenulata( Hook.f.et Thoms.)H. Ohba	5280863	Kaempferol	TNKS2
Rhodiola crenulata( Hook.f.et Thoms.)H. Ohba	5280863	Kaempferol	TNKS
Rhodiola crenulata( Hook.f.et Thoms.)H. Ohba	5280863	Kaempferol	CDK6
Rhodiola crenulata( Hook.f.et Thoms.)H. Ohba	5280863	Kaempferol	CDK2
Rhodiola crenulata( Hook.f.et Thoms.)H. Ohba	5280863	Kaempferol	CYP19A1
Rhodiola crenulata( Hook.f.et Thoms.)H. Ohba	5280863	Kaempferol	CSNK2A1
Rhodiola crenulata( Hook.f.et Thoms.)H. Ohba	5280863	Kaempferol	EGFR
Rhodiola crenulata( Hook.f.et Thoms.)H. Ohba	5280863	Kaempferol	AVPR2
Rhodiola crenulata( Hook.f.et Thoms.)H. Ohba	5280863	Kaempferol	IGF1R
Rhodiola crenulata( Hook.f.et Thoms.)H. Ohba	5280863	Kaempferol	F2
Rhodiola crenulata( Hook.f.et Thoms.)H. Ohba	5280863	Kaempferol	PIM1
Rhodiola crenulata( Hook.f.et Thoms.)H. Ohba	5280863	Kaempferol	AURKB
Rhodiola crenulata( Hook.f.et Thoms.)H. Ohba	5280863	Kaempferol	DRD4
Rhodiola crenulata( Hook.f.et Thoms.)H. Ohba	5280863	Kaempferol	MPO
Rhodiola crenulata( Hook.f.et Thoms.)H. Ohba	5280863	Kaempferol	PIK3R1
Rhodiola crenulata( Hook.f.et Thoms.)H. Ohba	5280863	Kaempferol	PYGL
Rhodiola crenulata( Hook.f.et Thoms.)H. Ohba	5280863	Kaempferol	CA1
Rhodiola crenulata( Hook.f.et Thoms.)H. Ohba	5280863	Kaempferol	SRC
Rhodiola crenulata( Hook.f.et Thoms.)H. Ohba	5280863	Kaempferol	PTK2
Rhodiola crenulata( Hook.f.et Thoms.)H. Ohba	5280863	Kaempferol	KDR
Rhodiola crenulata( Hook.f.et Thoms.)H. Ohba	5280863	Kaempferol	MMP13
Rhodiola crenulata( Hook.f.et Thoms.)H. Ohba	5280863	Kaempferol	MMP3
Rhodiola crenulata( Hook.f.et Thoms.)H. Ohba	5280863	Kaempferol	CA3
Rhodiola crenulata( Hook.f.et Thoms.)H. Ohba	5280863	Kaempferol	PLK1
Rhodiola crenulata( Hook.f.et Thoms.)H. Ohba	5280863	Kaempferol	CA6
Rhodiola crenulata( Hook.f.et Thoms.)H. Ohba	5280863	Kaempferol	PKN1
Rhodiola crenulata( Hook.f.et Thoms.)H. Ohba	5280863	Kaempferol	CA14
Rhodiola crenulata( Hook.f.et Thoms.)H. Ohba	5280863	Kaempferol	CA9
Rhodiola crenulata( Hook.f.et Thoms.)H. Ohba	5280863	Kaempferol	MET
Rhodiola crenulata( Hook.f.et Thoms.)H. Ohba	5280863	Kaempferol	NEK2
Rhodiola crenulata( Hook.f.et Thoms.)H. Ohba	5280863	Kaempferol	CXCR1
Rhodiola crenulata( Hook.f.et Thoms.)H. Ohba	5280863	Kaempferol	CAMK2B
Rhodiola crenulata( Hook.f.et Thoms.)H. Ohba	5280863	Kaempferol	ALK
Rhodiola crenulata( Hook.f.et Thoms.)H. Ohba	5280863	Kaempferol	AKT1
Rhodiola crenulata( Hook.f.et Thoms.)H. Ohba	5280863	Kaempferol	NEK6
Rhodiola crenulata( Hook.f.et Thoms.)H. Ohba	5280863	Kaempferol	PLA2G1B
Rhodiola crenulata( Hook.f.et Thoms.)H. Ohba	5280863	Kaempferol	CA5A
Rhodiola crenulata( Hook.f.et Thoms.)H. Ohba	5280863	Kaempferol	BACE1
Rhodiola crenulata( Hook.f.et Thoms.)H. Ohba	5280863	Kaempferol	AXL
Rhodiola crenulata( Hook.f.et Thoms.)H. Ohba	5280863	Kaempferol	NUAK1
Rhodiola crenulata( Hook.f.et Thoms.)H. Ohba	5280863	Kaempferol	AKR1C2
Rhodiola crenulata( Hook.f.et Thoms.)H. Ohba	5280863	Kaempferol	AKR1C1
Rhodiola crenulata( Hook.f.et Thoms.)H. Ohba	5280863	Kaempferol	AKR1C3
Rhodiola crenulata( Hook.f.et Thoms.)H. Ohba	5280863	Kaempferol	AKR1C4
Rhodiola crenulata( Hook.f.et Thoms.)H. Ohba	5280863	Kaempferol	CA13
Rhodiola crenulata( Hook.f.et Thoms.)H. Ohba	5280863	Kaempferol	AKR1A1
Rhodiola crenulata( Hook.f.et Thoms.)H. Ohba	5280863	Kaempferol	APP
Rhodiola crenulata( Hook.f.et Thoms.)H. Ohba	5280863	Kaempferol	PARP1
Rhodiola crenulata( Hook.f.et Thoms.)H. Ohba	5280863	Kaempferol	MMP12
Rhodiola crenulata( Hook.f.et Thoms.)H. Ohba	5280863	Kaempferol	CD38
Rhodiola crenulata( Hook.f.et Thoms.)H. Ohba	5280863	Kaempferol	TOP1
Rhodiola crenulata( Hook.f.et Thoms.)H. Ohba	5280863	Kaempferol	ESR1
Rhodiola crenulata( Hook.f.et Thoms.)H. Ohba	5280863	Kaempferol	PTGS2
Rhodiola crenulata( Hook.f.et Thoms.)H. Ohba	5280863	Kaempferol	CFTR
Rhodiola crenulata( Hook.f.et Thoms.)H. Ohba	5280863	Kaempferol	PFKFB3
Rhodiola crenulata( Hook.f.et Thoms.)H. Ohba	5280863	Kaempferol	AMY1A
Rhodiola crenulata( Hook.f.et Thoms.)H. Ohba	5280863	Kaempferol	GRK6
Rhodiola crenulata( Hook.f.et Thoms.)H. Ohba	5280863	Kaempferol	TERT
Rhodiola crenulata( Hook.f.et Thoms.)H. Ohba	5280863	Kaempferol	MAPT
Rhodiola crenulata( Hook.f.et Thoms.)H. Ohba	159278	Salidroside	TYR
Rhodiola crenulata( Hook.f.et Thoms.)H. Ohba	159278	Salidroside	CA2
Rhodiola crenulata( Hook.f.et Thoms.)H. Ohba	159278	Salidroside	CA7
Rhodiola crenulata( Hook.f.et Thoms.)H. Ohba	159278	Salidroside	CA1
Rhodiola crenulata( Hook.f.et Thoms.)H. Ohba	159278	Salidroside	CA3
Rhodiola crenulata( Hook.f.et Thoms.)H. Ohba	159278	Salidroside	CA12
Rhodiola crenulata( Hook.f.et Thoms.)H. Ohba	159278	Salidroside	CA14
Rhodiola crenulata( Hook.f.et Thoms.)H. Ohba	159278	Salidroside	CA9
Rhodiola crenulata( Hook.f.et Thoms.)H. Ohba	159278	Salidroside	CA4
Rhodiola crenulata( Hook.f.et Thoms.)H. Ohba	159278	Salidroside	CA5A
Rhodiola crenulata( Hook.f.et Thoms.)H. Ohba	159278	Salidroside	CA6
Rhodiola crenulata( Hook.f.et Thoms.)H. Ohba	159278	Salidroside	ADK
Rhodiola crenulata( Hook.f.et Thoms.)H. Ohba	159278	Salidroside	ADA
Rhodiola crenulata( Hook.f.et Thoms.)H. Ohba	159278	Salidroside	ADORA2A
Rhodiola crenulata( Hook.f.et Thoms.)H. Ohba	159278	Salidroside	AKR1C3
Rhodiola crenulata( Hook.f.et Thoms.)H. Ohba	159278	Salidroside	ADORA3
Rhodiola crenulata( Hook.f.et Thoms.)H. Ohba	159278	Salidroside	PNP
Rhodiola crenulata( Hook.f.et Thoms.)H. Ohba	13250	Ethyl gallate	SQLE
Rhodiola crenulata( Hook.f.et Thoms.)H. Ohba	13250	Ethyl gallate	CA2
Rhodiola crenulata( Hook.f.et Thoms.)H. Ohba	13250	Ethyl gallate	CA7
Rhodiola crenulata( Hook.f.et Thoms.)H. Ohba	13250	Ethyl gallate	CA1
Rhodiola crenulata( Hook.f.et Thoms.)H. Ohba	13250	Ethyl gallate	CA12
Rhodiola crenulata( Hook.f.et Thoms.)H. Ohba	13250	Ethyl gallate	CA14
Rhodiola crenulata( Hook.f.et Thoms.)H. Ohba	13250	Ethyl gallate	CA9
Rhodiola crenulata( Hook.f.et Thoms.)H. Ohba	13250	Ethyl gallate	FUT7
Rhodiola crenulata( Hook.f.et Thoms.)H. Ohba	13250	Ethyl gallate	CA13
Rhodiola crenulata( Hook.f.et Thoms.)H. Ohba	13250	Ethyl gallate	CA4
Rhodiola crenulata( Hook.f.et Thoms.)H. Ohba	13250	Ethyl gallate	SERPINE1
Rhodiola crenulata( Hook.f.et Thoms.)H. Ohba	13250	Ethyl gallate	CA3
Rhodiola crenulata( Hook.f.et Thoms.)H. Ohba	13250	Ethyl gallate	CA5A
Rhodiola crenulata( Hook.f.et Thoms.)H. Ohba	13250	Ethyl gallate	ESR2
Rhodiola crenulata( Hook.f.et Thoms.)H. Ohba	13250	Ethyl gallate	IGF1R
Rhodiola crenulata( Hook.f.et Thoms.)H. Ohba	13250	Ethyl gallate	ALK
Rhodiola crenulata( Hook.f.et Thoms.)H. Ohba	13250	Ethyl gallate	AURKB
Rhodiola crenulata( Hook.f.et Thoms.)H. Ohba	13250	Ethyl gallate	SRC
Rhodiola crenulata( Hook.f.et Thoms.)H. Ohba	13250	Ethyl gallate	PTK2
Rhodiola crenulata( Hook.f.et Thoms.)H. Ohba	13250	Ethyl gallate	KDR
Rhodiola crenulata( Hook.f.et Thoms.)H. Ohba	13250	Ethyl gallate	MET
Rhodiola crenulata( Hook.f.et Thoms.)H. Ohba	13250	Ethyl gallate	NEK2
Rhodiola crenulata( Hook.f.et Thoms.)H. Ohba	13250	Ethyl gallate	AXL
Rhodiola crenulata( Hook.f.et Thoms.)H. Ohba	13250	Ethyl gallate	CA6
Rhodiola crenulata( Hook.f.et Thoms.)H. Ohba	13250	Ethyl gallate	CA5B
Rhodiola crenulata( Hook.f.et Thoms.)H. Ohba	13250	Ethyl gallate	BCL2L1
Rhodiola crenulata( Hook.f.et Thoms.)H. Ohba	13250	Ethyl gallate	TYR
Rhodiola crenulata( Hook.f.et Thoms.)H. Ohba	13250	Ethyl gallate	ADAMTS5
Rhodiola crenulata( Hook.f.et Thoms.)H. Ohba	13250	Ethyl gallate	SNCA
Rhodiola crenulata( Hook.f.et Thoms.)H. Ohba	10393	2-(4-Hydroxyphenyl)ethanol	CA2
Rhodiola crenulata( Hook.f.et Thoms.)H. Ohba	10393	2-(4-Hydroxyphenyl)ethanol	ESRRG
Rhodiola crenulata( Hook.f.et Thoms.)H. Ohba	10393	2-(4-Hydroxyphenyl)ethanol	GABRA1
Rhodiola crenulata( Hook.f.et Thoms.)H. Ohba	10393	2-(4-Hydroxyphenyl)ethanol	GABRB2
Rhodiola crenulata( Hook.f.et Thoms.)H. Ohba	10393	2-(4-Hydroxyphenyl)ethanol	GABRG2
Rhodiola crenulata( Hook.f.et Thoms.)H. Ohba	10393	2-(4-Hydroxyphenyl)ethanol	PTGS1
Rhodiola crenulata( Hook.f.et Thoms.)H. Ohba	10393	2-(4-Hydroxyphenyl)ethanol	AR
Rhodiola crenulata( Hook.f.et Thoms.)H. Ohba	10393	2-(4-Hydroxyphenyl)ethanol	GABRB3
Rhodiola crenulata( Hook.f.et Thoms.)H. Ohba	10393	2-(4-Hydroxyphenyl)ethanol	CA4
Rhodiola crenulata( Hook.f.et Thoms.)H. Ohba	10393	2-(4-Hydroxyphenyl)ethanol	AKR1B1
Rhodiola crenulata( Hook.f.et Thoms.)H. Ohba	10393	2-(4-Hydroxyphenyl)ethanol	SHBG
Rhodiola crenulata( Hook.f.et Thoms.)H. Ohba	10393	2-(4-Hydroxyphenyl)ethanol	GABBR2
Rhodiola crenulata( Hook.f.et Thoms.)H. Ohba	10393	2-(4-Hydroxyphenyl)ethanol	GABBR1
Rhodiola crenulata( Hook.f.et Thoms.)H. Ohba	10393	2-(4-Hydroxyphenyl)ethanol	PTGS2
Rhodiola crenulata( Hook.f.et Thoms.)H. Ohba	10393	2-(4-Hydroxyphenyl)ethanol	TYR
Rhodiola crenulata( Hook.f.et Thoms.)H. Ohba	10393	2-(4-Hydroxyphenyl)ethanol	AKR1C3
Aconitum carmichaeli Debx	440988	(R)-Norcoclaurine	DRD2
Aconitum carmichaeli Debx	440988	(R)-Norcoclaurine	DRD4
Aconitum carmichaeli Debx	440988	(R)-Norcoclaurine	ADRB2
Aconitum carmichaeli Debx	440988	(R)-Norcoclaurine	ADRB1
Aconitum carmichaeli Debx	440988	(R)-Norcoclaurine	DRD3
Aconitum carmichaeli Debx	440988	(R)-Norcoclaurine	DRD1
Aconitum carmichaeli Debx	440988	(R)-Norcoclaurine	TBXA2R
Aconitum carmichaeli Debx	440988	(R)-Norcoclaurine	SIGMAR1
Aconitum carmichaeli Debx	440988	(R)-Norcoclaurine	SLC6A3
Aconitum carmichaeli Debx	440988	(R)-Norcoclaurine	DRD5
Aconitum carmichaeli Debx	440988	(R)-Norcoclaurine	ADRA1D
Aconitum carmichaeli Debx	440988	(R)-Norcoclaurine	ADRA1A
Aconitum carmichaeli Debx	440988	(R)-Norcoclaurine	ADRB3
Aconitum carmichaeli Debx	440988	(R)-Norcoclaurine	PRCP
Aconitum carmichaeli Debx	440988	(R)-Norcoclaurine	ADRA1B
Aconitum carmichaeli Debx	440988	(R)-Norcoclaurine	SLC6A4
Aconitum carmichaeli Debx	440988	(R)-Norcoclaurine	OPRM1
Aconitum carmichaeli Debx	440988	(R)-Norcoclaurine	OPRK1
Aconitum carmichaeli Debx	440988	(R)-Norcoclaurine	ESR2
Aconitum carmichaeli Debx	440988	(R)-Norcoclaurine	PNMT
Aconitum carmichaeli Debx	440988	(R)-Norcoclaurine	DHCR7
Aconitum carmichaeli Debx	440988	(R)-Norcoclaurine	CHRM4
Aconitum carmichaeli Debx	440988	(R)-Norcoclaurine	BCHE
Aconitum carmichaeli Debx	440988	(R)-Norcoclaurine	ACHE
Aconitum carmichaeli Debx	440988	(R)-Norcoclaurine	KCNN1
Aconitum carmichaeli Debx	440988	(R)-Norcoclaurine	KCNN3
Aconitum carmichaeli Debx	440988	(R)-Norcoclaurine	KCNN2
Aconitum carmichaeli Debx	440988	(R)-Norcoclaurine	OPRD1
Aconitum carmichaeli Debx	440988	(R)-Norcoclaurine	F3
Aconitum carmichaeli Debx	440988	(R)-Norcoclaurine	SLC6A2
Aconitum carmichaeli Debx	440988	(R)-Norcoclaurine	HTR1A
Aconitum carmichaeli Debx	440988	(R)-Norcoclaurine	ESR1
Aconitum carmichaeli Debx	440988	(R)-Norcoclaurine	RBBP9
Aconitum carmichaeli Debx	440988	(R)-Norcoclaurine	ADRA2A
Aconitum carmichaeli Debx	440988	(R)-Norcoclaurine	ADRA2C
Aconitum carmichaeli Debx	440988	(R)-Norcoclaurine	ABCB1
Aconitum carmichaeli Debx	440988	(R)-Norcoclaurine	HCRTR2
Aconitum carmichaeli Debx	440988	(R)-Norcoclaurine	HCRTR1
Aconitum carmichaeli Debx	440988	(R)-Norcoclaurine	MAOA
Aconitum carmichaeli Debx	440988	(R)-Norcoclaurine	MTNR1B
Aconitum carmichaeli Debx	440988	(R)-Norcoclaurine	OPRL1
Aconitum carmichaeli Debx	440988	(R)-Norcoclaurine	SLC47A1
Aconitum carmichaeli Debx	440988	(R)-Norcoclaurine	CHRNA3
Aconitum carmichaeli Debx	440988	(R)-Norcoclaurine	CHRNB4
Ophiopogon japonicus (Linn. f.) Ker-Gawl	99856	Cyperene	PPARA
Ophiopogon japonicus (Linn. f.) Ker-Gawl	99856	Cyperene	CNR2
Ophiopogon japonicus (Linn. f.) Ker-Gawl	99856	Cyperene	NR1I3
Ophiopogon japonicus (Linn. f.) Ker-Gawl	99856	Cyperene	AR
Ophiopogon japonicus (Linn. f.) Ker-Gawl	99856	Cyperene	CYP19A1
Ophiopogon japonicus (Linn. f.) Ker-Gawl	99856	Cyperene	ESR1
Ophiopogon japonicus (Linn. f.) Ker-Gawl	99856	Cyperene	CHRM2
Ophiopogon japonicus (Linn. f.) Ker-Gawl	99856	Cyperene	SLC6A2
Ophiopogon japonicus (Linn. f.) Ker-Gawl	99856	Cyperene	SLC6A4
Ophiopogon japonicus (Linn. f.) Ker-Gawl	99856	Cyperene	CYP2C19
Ophiopogon japonicus (Linn. f.) Ker-Gawl	99856	Cyperene	UGT2B7
Ophiopogon japonicus (Linn. f.) Ker-Gawl	99856	Cyperene	BCHE
Ophiopogon japonicus (Linn. f.) Ker-Gawl	2537	Camphor	NR1I3
Ophiopogon japonicus (Linn. f.) Ker-Gawl	2537	Camphor	CYP19A1
Ophiopogon japonicus (Linn. f.) Ker-Gawl	2537	Camphor	CA2
Ophiopogon japonicus (Linn. f.) Ker-Gawl	2537	Camphor	CA1
Ophiopogon japonicus (Linn. f.) Ker-Gawl	2537	Camphor	CA4
Ophiopogon japonicus (Linn. f.) Ker-Gawl	2537	Camphor	AR
Ophiopogon japonicus (Linn. f.) Ker-Gawl	2537	Camphor	CES1
Ophiopogon japonicus (Linn. f.) Ker-Gawl	2537	Camphor	CES2
Ophiopogon japonicus (Linn. f.) Ker-Gawl	2537	Camphor	ADH1A
Ophiopogon japonicus (Linn. f.) Ker-Gawl	2537	Camphor	ADH1C
Ophiopogon japonicus (Linn. f.) Ker-Gawl	2537	Camphor	SERPINA6
Ophiopogon japonicus (Linn. f.) Ker-Gawl	2537	Camphor	SHBG
Ophiopogon japonicus (Linn. f.) Ker-Gawl	2537	Camphor	G6PD
Ophiopogon japonicus (Linn. f.) Ker-Gawl	2537	Camphor	GABBR1
Ophiopogon japonicus (Linn. f.) Ker-Gawl	2537	Camphor	CTSK
Ophiopogon japonicus (Linn. f.) Ker-Gawl	2537	Camphor	VDR
Ophiopogon japonicus (Linn. f.) Ker-Gawl	2537	Camphor	NPC1L1
Ophiopogon japonicus (Linn. f.) Ker-Gawl	2537	Camphor	NR1H4
Ophiopogon japonicus (Linn. f.) Ker-Gawl	2537	Camphor	GABRA2
Ophiopogon japonicus (Linn. f.) Ker-Gawl	2537	Camphor	GABRB2
Ophiopogon japonicus (Linn. f.) Ker-Gawl	2537	Camphor	GABRG2
Ophiopogon japonicus (Linn. f.) Ker-Gawl	2537	Camphor	CDC25A
Ophiopogon japonicus (Linn. f.) Ker-Gawl	2537	Camphor	GPBAR1
Ophiopogon japonicus (Linn. f.) Ker-Gawl	2537	Camphor	AKR1B10
Ophiopogon japonicus (Linn. f.) Ker-Gawl	2537	Camphor	POLB
Ophiopogon japonicus (Linn. f.) Ker-Gawl	11230	Terpinen-4-ol	AR
Ophiopogon japonicus (Linn. f.) Ker-Gawl	11230	Terpinen-4-ol	CYP19A1
Ophiopogon japonicus (Linn. f.) Ker-Gawl	11230	Terpinen-4-ol	CA2
Ophiopogon japonicus (Linn. f.) Ker-Gawl	11230	Terpinen-4-ol	CA1
Ophiopogon japonicus (Linn. f.) Ker-Gawl	11230	Terpinen-4-ol	CA4
Ophiopogon japonicus (Linn. f.) Ker-Gawl	11230	Terpinen-4-ol	RORC
Ophiopogon japonicus (Linn. f.) Ker-Gawl	11230	Terpinen-4-ol	SREBF2
Ophiopogon japonicus (Linn. f.) Ker-Gawl	11230	Terpinen-4-ol	NPC1L1
Ophiopogon japonicus (Linn. f.) Ker-Gawl	11230	Terpinen-4-ol	NR1H3
Ophiopogon japonicus (Linn. f.) Ker-Gawl	11230	Terpinen-4-ol	HMGCR
Ophiopogon japonicus (Linn. f.) Ker-Gawl	11230	Terpinen-4-ol	TRPM8
Ophiopogon japonicus (Linn. f.) Ker-Gawl	11230	Terpinen-4-ol	ESR2
Ophiopogon japonicus (Linn. f.) Ker-Gawl	11230	Terpinen-4-ol	CHRM2
Ophiopogon japonicus (Linn. f.) Ker-Gawl	11230	Terpinen-4-ol	CYP17A1
Ophiopogon japonicus (Linn. f.) Ker-Gawl	11230	Terpinen-4-ol	PTPN1
Ophiopogon japonicus (Linn. f.) Ker-Gawl	11230	Terpinen-4-ol	RORA
Ophiopogon japonicus (Linn. f.) Ker-Gawl	11230	Terpinen-4-ol	SQLE
Ophiopogon japonicus (Linn. f.) Ker-Gawl	11230	Terpinen-4-ol	DRD2
Ophiopogon japonicus (Linn. f.) Ker-Gawl	11230	Terpinen-4-ol	SLC6A4
Ophiopogon japonicus (Linn. f.) Ker-Gawl	11230	Terpinen-4-ol	CYP51A1
Ophiopogon japonicus (Linn. f.) Ker-Gawl	11230	Terpinen-4-ol	PPARA
Ophiopogon japonicus (Linn. f.) Ker-Gawl	11230	Terpinen-4-ol	PPARD
Ophiopogon japonicus (Linn. f.) Ker-Gawl	11230	Terpinen-4-ol	G6PD
Ophiopogon japonicus (Linn. f.) Ker-Gawl	11230	Terpinen-4-ol	ESR1
Ophiopogon japonicus (Linn. f.) Ker-Gawl	11230	Terpinen-4-ol	ACHE
Ophiopogon japonicus (Linn. f.) Ker-Gawl	11230	Terpinen-4-ol	ADRA2C
Ophiopogon japonicus (Linn. f.) Ker-Gawl	11230	Terpinen-4-ol	HSD17B2
Ophiopogon japonicus (Linn. f.) Ker-Gawl	11230	Terpinen-4-ol	SHBG
Ophiopogon japonicus (Linn. f.) Ker-Gawl	11230	Terpinen-4-ol	SLC6A2
Ophiopogon japonicus (Linn. f.) Ker-Gawl	11230	Terpinen-4-ol	NR3C1
Ophiopogon japonicus (Linn. f.) Ker-Gawl	11230	Terpinen-4-ol	NR3C2
Ophiopogon japonicus (Linn. f.) Ker-Gawl	11230	Terpinen-4-ol	BCHE
Ophiopogon japonicus (Linn. f.) Ker-Gawl	11230	Terpinen-4-ol	PTPRF
Ophiopogon japonicus (Linn. f.) Ker-Gawl	11230	Terpinen-4-ol	PTPN2
Ophiopogon japonicus (Linn. f.) Ker-Gawl	11230	Terpinen-4-ol	PLA2G1B
Ophiopogon japonicus (Linn. f.) Ker-Gawl	11230	Terpinen-4-ol	ACP1
Ophiopogon japonicus (Linn. f.) Ker-Gawl	11230	Terpinen-4-ol	AKR1B10
Ophiopogon japonicus (Linn. f.) Ker-Gawl	6549	Linalool	TRPV3
Ophiopogon japonicus (Linn. f.) Ker-Gawl	6549	Linalool	CA2
Ophiopogon japonicus (Linn. f.) Ker-Gawl	6549	Linalool	CA1
Ophiopogon japonicus (Linn. f.) Ker-Gawl	6549	Linalool	CA4
Ophiopogon japonicus (Linn. f.) Ker-Gawl	6549	Linalool	TRPM8
Ophiopogon japonicus (Linn. f.) Ker-Gawl	6549	Linalool	NR3C2
Ophiopogon japonicus (Linn. f.) Ker-Gawl	6549	Linalool	NR3C1
Ophiopogon japonicus (Linn. f.) Ker-Gawl	6549	Linalool	PGR
Ophiopogon japonicus (Linn. f.) Ker-Gawl	6549	Linalool	SIGMAR1
Ophiopogon japonicus (Linn. f.) Ker-Gawl	6549	Linalool	SLC6A3
Ophiopogon japonicus (Linn. f.) Ker-Gawl	6549	Linalool	SQLE
Ophiopogon japonicus (Linn. f.) Ker-Gawl	6549	Linalool	IDO1
Ophiopogon japonicus (Linn. f.) Ker-Gawl	6549	Linalool	HSD17B2
Ophiopogon japonicus (Linn. f.) Ker-Gawl	6549	Linalool	DRD2
Ophiopogon japonicus (Linn. f.) Ker-Gawl	6549	Linalool	CHRM4
Ophiopogon japonicus (Linn. f.) Ker-Gawl	6549	Linalool	OPRM1
Ophiopogon japonicus (Linn. f.) Ker-Gawl	6549	Linalool	OPRD1
Ophiopogon japonicus (Linn. f.) Ker-Gawl	6549	Linalool	OPRK1
Ophiopogon japonicus (Linn. f.) Ker-Gawl	6549	Linalool	ADRA2C
Ophiopogon japonicus (Linn. f.) Ker-Gawl	6549	Linalool	HMOX1
Ophiopogon japonicus (Linn. f.) Ker-Gawl	6549	Linalool	JAK1
Ophiopogon japonicus (Linn. f.) Ker-Gawl	6549	Linalool	JAK2
Ophiopogon japonicus (Linn. f.) Ker-Gawl	6549	Linalool	PTGS2
Ophiopogon japonicus (Linn. f.) Ker-Gawl	6549	Linalool	KCNA5
Ophiopogon japonicus (Linn. f.) Ker-Gawl	6549	Linalool	PTAFR
Ophiopogon japonicus (Linn. f.) Ker-Gawl	6549	Linalool	SCN5A
Ophiopogon japonicus (Linn. f.) Ker-Gawl	6549	Linalool	SCN9A
Ophiopogon japonicus (Linn. f.) Ker-Gawl	6549	Linalool	PARP1
Ophiopogon japonicus (Linn. f.) Ker-Gawl	6549	Linalool	ADRA1A
Ophiopogon japonicus (Linn. f.) Ker-Gawl	6549	Linalool	HRH3
Ophiopogon japonicus (Linn. f.) Ker-Gawl	6549	Linalool	HRH4
Ophiopogon japonicus (Linn. f.) Ker-Gawl	6549	Linalool	JAK3
Ophiopogon japonicus (Linn. f.) Ker-Gawl	6549	Linalool	TYK2
Ophiopogon japonicus (Linn. f.) Ker-Gawl	6549	Linalool	TNNC1
Ophiopogon japonicus (Linn. f.) Ker-Gawl	6549	Linalool	TNNT2
Ophiopogon japonicus (Linn. f.) Ker-Gawl	6549	Linalool	TNNI3
Ophiopogon japonicus (Linn. f.) Ker-Gawl	6549	Linalool	LRRK2
Ophiopogon japonicus (Linn. f.) Ker-Gawl	6549	Linalool	AR
Ophiopogon japonicus (Linn. f.) Ker-Gawl	60961	Adenosine	ADORA1
Ophiopogon japonicus (Linn. f.) Ker-Gawl	60961	Adenosine	ADORA2A
Ophiopogon japonicus (Linn. f.) Ker-Gawl	60961	Adenosine	ADORA3
Ophiopogon japonicus (Linn. f.) Ker-Gawl	60961	Adenosine	DPP4
Ophiopogon japonicus (Linn. f.) Ker-Gawl	60961	Adenosine	ADK
Ophiopogon japonicus (Linn. f.) Ker-Gawl	60961	Adenosine	HSPA8
Ophiopogon japonicus (Linn. f.) Ker-Gawl	60961	Adenosine	HSPA5
Ophiopogon japonicus (Linn. f.) Ker-Gawl	60961	Adenosine	ADA
Ophiopogon japonicus (Linn. f.) Ker-Gawl	60961	Adenosine	AHCY
Ophiopogon japonicus (Linn. f.) Ker-Gawl	60961	Adenosine	GAPDH
Ophiopogon japonicus (Linn. f.) Ker-Gawl	60961	Adenosine	EHMT1
Ophiopogon japonicus (Linn. f.) Ker-Gawl	60961	Adenosine	EHMT2
Ophiopogon japonicus (Linn. f.) Ker-Gawl	60961	Adenosine	MCL1
Ophiopogon japonicus (Linn. f.) Ker-Gawl	60961	Adenosine	SETD7
Ophiopogon japonicus (Linn. f.) Ker-Gawl	60961	Adenosine	AMD1
Ophiopogon japonicus (Linn. f.) Ker-Gawl	60961	Adenosine	EGFR
Ophiopogon japonicus (Linn. f.) Ker-Gawl	60961	Adenosine	SRM
Ophiopogon japonicus (Linn. f.) Ker-Gawl	60961	Adenosine	PDCD4
Ophiopogon japonicus (Linn. f.) Ker-Gawl	60961	Adenosine	SRC
Ophiopogon japonicus (Linn. f.) Ker-Gawl	60961	Adenosine	ADORA2B
Ophiopogon japonicus (Linn. f.) Ker-Gawl	60961	Adenosine	MAPK1
Ophiopogon japonicus (Linn. f.) Ker-Gawl	60961	Adenosine	SLC29A1
Ophiopogon japonicus (Linn. f.) Ker-Gawl	60961	Adenosine	PNP
Ophiopogon japonicus (Linn. f.) Ker-Gawl	60961	Adenosine	SETD2
Ophiopogon japonicus (Linn. f.) Ker-Gawl	60961	Adenosine	CARM1
Ophiopogon japonicus (Linn. f.) Ker-Gawl	60961	Adenosine	PRMT1
Ophiopogon japonicus (Linn. f.) Ker-Gawl	60961	Adenosine	DOT1L
Ophiopogon japonicus (Linn. f.) Ker-Gawl	60961	Adenosine	GRK1
Ophiopogon japonicus (Linn. f.) Ker-Gawl	60961	Adenosine	P2RY1
Ophiopogon japonicus (Linn. f.) Ker-Gawl	60961	Adenosine	P2RY11
Ophiopogon japonicus (Linn. f.) Ker-Gawl	60961	Adenosine	MTAP
Ophiopogon japonicus (Linn. f.) Ker-Gawl	60961	Adenosine	ROCK2
Ophiopogon japonicus (Linn. f.) Ker-Gawl	60961	Adenosine	PRKACA
Ophiopogon japonicus (Linn. f.) Ker-Gawl	60961	Adenosine	SMS
Ophiopogon japonicus (Linn. f.) Ker-Gawl	60961	Adenosine	FBP1
Ophiopogon japonicus (Linn. f.) Ker-Gawl	60961	Adenosine	FHIT
Ophiopogon japonicus (Linn. f.) Ker-Gawl	60961	Adenosine	CDA
Ophiopogon japonicus (Linn. f.) Ker-Gawl	60961	Adenosine	KMT2A
Ophiopogon japonicus (Linn. f.) Ker-Gawl	60961	Adenosine	SUV39H1
Ophiopogon japonicus (Linn. f.) Ker-Gawl	60961	Adenosine	DNMT1
Ophiopogon japonicus (Linn. f.) Ker-Gawl	60961	Adenosine	INMT
Ophiopogon japonicus (Linn. f.) Ker-Gawl	60961	Adenosine	SMYD2
Ophiopogon japonicus (Linn. f.) Ker-Gawl	60961	Adenosine	EZH2
Ophiopogon japonicus (Linn. f.) Ker-Gawl	60961	Adenosine	EZH1
Ophiopogon japonicus (Linn. f.) Ker-Gawl	60961	Adenosine	SETDB1
Ophiopogon japonicus (Linn. f.) Ker-Gawl	60961	Adenosine	PNMT
Ophiopogon japonicus (Linn. f.) Ker-Gawl	60961	Adenosine	DNMT3B
Ophiopogon japonicus (Linn. f.) Ker-Gawl	60961	Adenosine	MAPKAPK2
Ophiopogon japonicus (Linn. f.) Ker-Gawl	60961	Adenosine	HSPA1A
Ophiopogon japonicus (Linn. f.) Ker-Gawl	60961	Adenosine	RARS
Ophiopogon japonicus (Linn. f.) Ker-Gawl	60961	Adenosine	CA2
Ophiopogon japonicus (Linn. f.) Ker-Gawl	60961	Adenosine	CA1
Ophiopogon japonicus (Linn. f.) Ker-Gawl	60961	Adenosine	CA12
Ophiopogon japonicus (Linn. f.) Ker-Gawl	60961	Adenosine	CA9
Ophiopogon japonicus (Linn. f.) Ker-Gawl	60961	Adenosine	OGA
Ophiopogon japonicus (Linn. f.) Ker-Gawl	60961	Adenosine	CCND1
Ophiopogon japonicus (Linn. f.) Ker-Gawl	60961	Adenosine	CDK4
Ophiopogon japonicus (Linn. f.) Ker-Gawl	60961	Adenosine	CA14
Ophiopogon japonicus (Linn. f.) Ker-Gawl	60961	Adenosine	FUCA1
Ophiopogon japonicus (Linn. f.) Ker-Gawl	60961	Adenosine	HSD17B1
Ophiopogon japonicus (Linn. f.) Ker-Gawl	60961	Adenosine	PIM1
Ophiopogon japonicus (Linn. f.) Ker-Gawl	60961	Adenosine	GBA
Ophiopogon japonicus (Linn. f.) Ker-Gawl	60961	Adenosine	GAA
Ophiopogon japonicus (Linn. f.) Ker-Gawl	60961	Adenosine	MARS
Ophiopogon japonicus (Linn. f.) Ker-Gawl	60961	Adenosine	GSK3B
Ophiopogon japonicus (Linn. f.) Ker-Gawl	60961	Adenosine	PRMT7
Ophiopogon japonicus (Linn. f.) Ker-Gawl	60961	Adenosine	PARG
Ophiopogon japonicus (Linn. f.) Ker-Gawl	60961	Adenosine	IDO1
Ophiopogon japonicus (Linn. f.) Ker-Gawl	60961	Adenosine	SLC28A2
Ophiopogon japonicus (Linn. f.) Ker-Gawl	60961	Adenosine	IARS
Ophiopogon japonicus (Linn. f.) Ker-Gawl	60961	Adenosine	DAO
Ophiopogon japonicus (Linn. f.) Ker-Gawl	60961	Adenosine	F2
Ophiopogon japonicus (Linn. f.) Ker-Gawl	227829	Guaiol	NR1I3
Ophiopogon japonicus (Linn. f.) Ker-Gawl	227829	Guaiol	CYP19A1
Ophiopogon japonicus (Linn. f.) Ker-Gawl	227829	Guaiol	PTPN1
Ophiopogon japonicus (Linn. f.) Ker-Gawl	227829	Guaiol	SLC6A4
Ophiopogon japonicus (Linn. f.) Ker-Gawl	227829	Guaiol	AR
Ophiopogon japonicus (Linn. f.) Ker-Gawl	227829	Guaiol	ESR1
Ophiopogon japonicus (Linn. f.) Ker-Gawl	227829	Guaiol	CHRM2
Ophiopogon japonicus (Linn. f.) Ker-Gawl	227829	Guaiol	ACHE
Ophiopogon japonicus (Linn. f.) Ker-Gawl	227829	Guaiol	SLC6A2
Ophiopogon japonicus (Linn. f.) Ker-Gawl	227829	Guaiol	CYP2C19
Ophiopogon japonicus (Linn. f.) Ker-Gawl	227829	Guaiol	NR1H3
Ophiopogon japonicus (Linn. f.) Ker-Gawl	227829	Guaiol	SQLE
Ophiopogon japonicus (Linn. f.) Ker-Gawl	227829	Guaiol	CYP17A1
Ophiopogon japonicus (Linn. f.) Ker-Gawl	227829	Guaiol	CES2
Ophiopogon japonicus (Linn. f.) Ker-Gawl	227829	Guaiol	BCHE
Ophiopogon japonicus (Linn. f.) Ker-Gawl	227829	Guaiol	UGT2B7
Ophiopogon japonicus (Linn. f.) Ker-Gawl	227829	Guaiol	HSD11B1
Ophiopogon japonicus (Linn. f.) Ker-Gawl	227829	Guaiol	SREBF2
Ophiopogon japonicus (Linn. f.) Ker-Gawl	227829	Guaiol	NPC1L1
Ophiopogon japonicus (Linn. f.) Ker-Gawl	227829	Guaiol	FABP4
Ophiopogon japonicus (Linn. f.) Ker-Gawl	227829	Guaiol	PPARA
Ophiopogon japonicus (Linn. f.) Ker-Gawl	227829	Guaiol	TERT
Ophiopogon japonicus (Linn. f.) Ker-Gawl	227829	Guaiol	FABP3
Ophiopogon japonicus (Linn. f.) Ker-Gawl	227829	Guaiol	FABP5
Ophiopogon japonicus (Linn. f.) Ker-Gawl	227829	Guaiol	PPARD
Ophiopogon japonicus (Linn. f.) Ker-Gawl	227829	Guaiol	FABP1
Ophiopogon japonicus (Linn. f.) Ker-Gawl	227829	Guaiol	CYP51A1
Ophiopogon japonicus (Linn. f.) Ker-Gawl	227829	Guaiol	SHBG
Ophiopogon japonicus (Linn. f.) Ker-Gawl	227829	Guaiol	HMGCR
Ophiopogon japonicus (Linn. f.) Ker-Gawl	227829	Guaiol	POLB
Ophiopogon japonicus (Linn. f.) Ker-Gawl	227829	Guaiol	PDE4D
Ophiopogon japonicus (Linn. f.) Ker-Gawl	227829	Guaiol	PTPRF
Ophiopogon japonicus (Linn. f.) Ker-Gawl	227829	Guaiol	PTPN2
Ophiopogon japonicus (Linn. f.) Ker-Gawl	227829	Guaiol	PLA2G1B
Ophiopogon japonicus (Linn. f.) Ker-Gawl	227829	Guaiol	ACP1
Ophiopogon japonicus (Linn. f.) Ker-Gawl	227829	Guaiol	SCD
Ophiopogon japonicus (Linn. f.) Ker-Gawl	227829	Guaiol	AKR1B10
Ophiopogon japonicus (Linn. f.) Ker-Gawl	227829	Guaiol	CDC25B
Ophiopogon japonicus (Linn. f.) Ker-Gawl	12313993	(1S,4R,7R)-1,4,9,9-Tetramethyl-1,2,3,4,5,6,7,8-octahydro-4,7-methanoazulene	PPARA
Ophiopogon japonicus (Linn. f.) Ker-Gawl	12313993	(1S,4R,7R)-1,4,9,9-Tetramethyl-1,2,3,4,5,6,7,8-octahydro-4,7-methanoazulene	CNR2
Ophiopogon japonicus (Linn. f.) Ker-Gawl	12313993	(1S,4R,7R)-1,4,9,9-Tetramethyl-1,2,3,4,5,6,7,8-octahydro-4,7-methanoazulene	AR
Ophiopogon japonicus (Linn. f.) Ker-Gawl	12313993	(1S,4R,7R)-1,4,9,9-Tetramethyl-1,2,3,4,5,6,7,8-octahydro-4,7-methanoazulene	CYP19A1
Ophiopogon japonicus (Linn. f.) Ker-Gawl	12313993	(1S,4R,7R)-1,4,9,9-Tetramethyl-1,2,3,4,5,6,7,8-octahydro-4,7-methanoazulene	ESR1
Ophiopogon japonicus (Linn. f.) Ker-Gawl	12313993	(1S,4R,7R)-1,4,9,9-Tetramethyl-1,2,3,4,5,6,7,8-octahydro-4,7-methanoazulene	CHRM2
Ophiopogon japonicus (Linn. f.) Ker-Gawl	12313993	(1S,4R,7R)-1,4,9,9-Tetramethyl-1,2,3,4,5,6,7,8-octahydro-4,7-methanoazulene	SLC6A2
Ophiopogon japonicus (Linn. f.) Ker-Gawl	12313993	(1S,4R,7R)-1,4,9,9-Tetramethyl-1,2,3,4,5,6,7,8-octahydro-4,7-methanoazulene	SLC6A4
Ophiopogon japonicus (Linn. f.) Ker-Gawl	12313993	(1S,4R,7R)-1,4,9,9-Tetramethyl-1,2,3,4,5,6,7,8-octahydro-4,7-methanoazulene	CYP2C19
Ophiopogon japonicus (Linn. f.) Ker-Gawl	12313993	(1S,4R,7R)-1,4,9,9-Tetramethyl-1,2,3,4,5,6,7,8-octahydro-4,7-methanoazulene	NR1I3
Ophiopogon japonicus (Linn. f.) Ker-Gawl	5280537	Moupinamide	MMP9
Ophiopogon japonicus (Linn. f.) Ker-Gawl	5280537	Moupinamide	MMP2
Ophiopogon japonicus (Linn. f.) Ker-Gawl	5280537	Moupinamide	MMP1
Ophiopogon japonicus (Linn. f.) Ker-Gawl	5280537	Moupinamide	EGFR
Ophiopogon japonicus (Linn. f.) Ker-Gawl	5280537	Moupinamide	CNR2
Ophiopogon japonicus (Linn. f.) Ker-Gawl	5280537	Moupinamide	TYR
Ophiopogon japonicus (Linn. f.) Ker-Gawl	5280537	Moupinamide	MAOB
Ophiopogon japonicus (Linn. f.) Ker-Gawl	5280537	Moupinamide	PTGS2
Ophiopogon japonicus (Linn. f.) Ker-Gawl	5280537	Moupinamide	BRAF
Ophiopogon japonicus (Linn. f.) Ker-Gawl	5280537	Moupinamide	ALOX5
Ophiopogon japonicus (Linn. f.) Ker-Gawl	5280537	Moupinamide	ALDH2
Ophiopogon japonicus (Linn. f.) Ker-Gawl	5280537	Moupinamide	MMP3
Ophiopogon japonicus (Linn. f.) Ker-Gawl	5280537	Moupinamide	MMP8
Ophiopogon japonicus (Linn. f.) Ker-Gawl	5280537	Moupinamide	CHEK1
Ophiopogon japonicus (Linn. f.) Ker-Gawl	5280537	Moupinamide	WEE1
Ophiopogon japonicus (Linn. f.) Ker-Gawl	5280537	Moupinamide	DNM1
Ophiopogon japonicus (Linn. f.) Ker-Gawl	5280537	Moupinamide	PRKCZ
Ophiopogon japonicus (Linn. f.) Ker-Gawl	5280537	Moupinamide	THRA
Ophiopogon japonicus (Linn. f.) Ker-Gawl	5280537	Moupinamide	CDK5R1
Ophiopogon japonicus (Linn. f.) Ker-Gawl	5280537	Moupinamide	CDK5
Ophiopogon japonicus (Linn. f.) Ker-Gawl	5280537	Moupinamide	THRB
Ophiopogon japonicus (Linn. f.) Ker-Gawl	5280537	Moupinamide	CTSL
Ophiopogon japonicus (Linn. f.) Ker-Gawl	5280537	Moupinamide	HSP90AA1
Ophiopogon japonicus (Linn. f.) Ker-Gawl	5280537	Moupinamide	ABL1
Ophiopogon japonicus (Linn. f.) Ker-Gawl	5280537	Moupinamide	SYK
Ophiopogon japonicus (Linn. f.) Ker-Gawl	5280537	Moupinamide	GLI2
Ophiopogon japonicus (Linn. f.) Ker-Gawl	5280537	Moupinamide	PDK1
Ophiopogon japonicus (Linn. f.) Ker-Gawl	5280537	Moupinamide	BCHE
Ophiopogon japonicus (Linn. f.) Ker-Gawl	5280537	Moupinamide	DRD2
Ophiopogon japonicus (Linn. f.) Ker-Gawl	5280537	Moupinamide	DRD3
Ophiopogon japonicus (Linn. f.) Ker-Gawl	5280537	Moupinamide	BMP1
Ophiopogon japonicus (Linn. f.) Ker-Gawl	5280537	Moupinamide	CDK1
Ophiopogon japonicus (Linn. f.) Ker-Gawl	5280537	Moupinamide	RPS6KB1
Ophiopogon japonicus (Linn. f.) Ker-Gawl	5280537	Moupinamide	CCNE1
Ophiopogon japonicus (Linn. f.) Ker-Gawl	5280537	Moupinamide	CCNB1
Ophiopogon japonicus (Linn. f.) Ker-Gawl	5280537	Moupinamide	CDK2
Ophiopogon japonicus (Linn. f.) Ker-Gawl	5280537	Moupinamide	CDK3
Ophiopogon japonicus (Linn. f.) Ker-Gawl	5280537	Moupinamide	GRK2
Ophiopogon japonicus (Linn. f.) Ker-Gawl	5280537	Moupinamide	ACHE
Ophiopogon japonicus (Linn. f.) Ker-Gawl	5280537	Moupinamide	EP300
Ophiopogon japonicus (Linn. f.) Ker-Gawl	5280537	Moupinamide	DUSP3
Ophiopogon japonicus (Linn. f.) Ker-Gawl	5280537	Moupinamide	ESRRA
Ophiopogon japonicus (Linn. f.) Ker-Gawl	5280537	Moupinamide	ESRRB
Ophiopogon japonicus (Linn. f.) Ker-Gawl	5280537	Moupinamide	HSD17B2
Ophiopogon japonicus (Linn. f.) Ker-Gawl	5280537	Moupinamide	HSD17B1
Ophiopogon japonicus (Linn. f.) Ker-Gawl	5280537	Moupinamide	INSR
Ophiopogon japonicus (Linn. f.) Ker-Gawl	5280537	Moupinamide	EPHA2
Ophiopogon japonicus (Linn. f.) Ker-Gawl	5280537	Moupinamide	EPHB2
Ophiopogon japonicus (Linn. f.) Ker-Gawl	5280537	Moupinamide	EPHA5
Ophiopogon japonicus (Linn. f.) Ker-Gawl	5280537	Moupinamide	EPHA4
Ophiopogon japonicus (Linn. f.) Ker-Gawl	5280537	Moupinamide	EPHA8
Ophiopogon japonicus (Linn. f.) Ker-Gawl	5280537	Moupinamide	EPHA7
Ophiopogon japonicus (Linn. f.) Ker-Gawl	5280537	Moupinamide	EPHB3
Ophiopogon japonicus (Linn. f.) Ker-Gawl	5280537	Moupinamide	EPHA3
Ophiopogon japonicus (Linn. f.) Ker-Gawl	5280537	Moupinamide	EPHB1
Ophiopogon japonicus (Linn. f.) Ker-Gawl	5280537	Moupinamide	EPHA1
Ophiopogon japonicus (Linn. f.) Ker-Gawl	5280537	Moupinamide	MYLK
Ophiopogon japonicus (Linn. f.) Ker-Gawl	5280537	Moupinamide	MTOR
Ophiopogon japonicus (Linn. f.) Ker-Gawl	5280537	Moupinamide	TRPM8
Ophiopogon japonicus (Linn. f.) Ker-Gawl	5280537	Moupinamide	MMP13
Ophiopogon japonicus (Linn. f.) Ker-Gawl	5280537	Moupinamide	MMP7
Ophiopogon japonicus (Linn. f.) Ker-Gawl	5280537	Moupinamide	AKT2
Ophiopogon japonicus (Linn. f.) Ker-Gawl	5280537	Moupinamide	CDK4
Ophiopogon japonicus (Linn. f.) Ker-Gawl	5280537	Moupinamide	MCL1
Ophiopogon japonicus (Linn. f.) Ker-Gawl	5280537	Moupinamide	HPGDS
Ophiopogon japonicus (Linn. f.) Ker-Gawl	5280537	Moupinamide	HDAC1
Ophiopogon japonicus (Linn. f.) Ker-Gawl	5280537	Moupinamide	ANPEP
[truncated: 3,169 more rows]
